# Supplementary material for: Leveraging Public Single-Cell and Bulk Transcriptomic Datasets to Delineate MAIT Cell Roles and Phenotypic Characteristics in Human Malignancies
Source: Front Immunol. 2020 Jul 31;11:1691. doi: 10.3389/fimmu.2020.01691 (PMC7413026; doi:10.3389/fimmu.2020.01691)
Supplement: Supplementary file 1 [file Table_1.xlsx]

## Sheet: Supplementary Table 1
Disease Status (Abbr)	GEO Accession	# Subjects	# Cells	Reference
Hepatocellular Carcinoma (HCC)	GSE98638	6	3792	Zheng et al., Cell (2017)
Colorectal Cancer (CRC)	GSE108989	12	9878	Zhang et al., Nature (2018)
Non-Small Cell Lung Cancer (NSCLC)	GSE99254	14	10202	Guo et al., Nat Med (2018)
None - Healthy Donors (N/A)	GSE124731	6	N/A (Bulk)	Guetierrez-Arcelus et al., Nat Commun (2019)
None - Healthy Donors (N/A)	GSE124731	2	2036	Guetierrez-Arcelus et al., Nat Commun (2019)
Hepatocellular Carcinoma (HCC) - Discovery Set	GSE125449	12	5115	Ma et al., Cancer Cell (2019)
Hepatocellular Carcinoma (HCC) - Validation Set	GSE125449	7	4831	Ma et al., Cancer Cell (2019)
Basal Cell Carcinoma (BCC)	GSE123814	11	33106	Yost et al., Nat Med (2019)
Squamous Cell Carcinoma (SCC)	GSE123814	4	26016	Yost et al., Nat Med (2019)
TCGA Cancer Type	Abbreviation	# Samples
Lung Adenocarcinoma	LUAD	566
Lung Squamous Cell Carcinoma	LUSC	487
Colorectal Adenocarcinoma	COADREAD	594
Liver Hepatocellular Carcinoma	LIHC	369
Skin Cutaneous Melanoma	SKCM	442
Esophageal Adenocarcinoma	ESCA	87
Breast Invasive Carcinoma	BRCA	1075
Stomach Adenocarcinoma	STAD	423
Head and Neck Squamous Cell Carcinoma	HNSC	523
Ovarian Serous Cystadenocarcinoma	OV	585
Prostate Adenocarcinoma	PRAD	494
Thyroid Carcinoma	THCA	499
Kidney Renal Papillary Cell Carcinoma	KIRP	283
Kidney Renal Clear Cell Carcinoma	KIRC	512
Kidney Chromophobe	KICH	65
Pancreatic Adenocarcinoma	PAAD	184
Bladder Urothelial Carcinoma	BLCA	411
Cervical Squamous Cell Carcinoma	CESC	251
Glioblastoma	GBM	585
Brain Lower Grade Glioma	LGG	514
Supplementary Table 1. Datasets used in this study

## Sheet: Supplementary Table 2
Gene	logFC	Mean Exp	t	P.Value	adj.P.Val	B
NSCLC
GMPR2	-3.9588	0.0399439	-4.85724	3.2418e-06	0.000453178	4.27322
S1PR1	-3.94035	-0.946237	-4.74195	5.30032e-06	0.000453178	3.82311
CAPN15	-1.52759	-0.0552254	-4.34614	2.70205e-05	0.00101003	2.33682
MEGF11	-1.0878	0.0485346	-4.32348	2.95767e-05	0.00101003	2.2546
CD55	-4.26308	0.581465	-4.28028	3.51082e-05	0.00101003	2.09873
CENPQ	-1.57219	0.0657483	-4.22784	4.31623e-05	0.00101003	1.91112
FAM86C2P	-1.14356	0.056563	-4.1886	5.03192e-05	0.00101003	1.77188
KCTD18	-2.34495	0.194742	-4.1763	5.27896e-05	0.00101003	1.7284
NOL6	-2.67022	0.163007	-4.1745	5.31592e-05	0.00101003	1.72207
FECH	-1.50834	-0.112982	-4.14228	6.02344e-05	0.00103001	1.60877
FXYD7	-1.03672	-0.108657	-4.05417	8.44869e-05	0.00122007	1.30232
MPND	-0.860587	0.0158307	-4.05068	8.56189e-05	0.00122007	1.29027
PATJ	-3.50382	0.317745	-3.95532	0.000122755	0.00161443	0.964597
PABPC3	-1.15814	-0.0735128	-3.92242	0.000138806	0.00161443	0.853665
PRKAG2-AS1	-1.48219	-0.0510094	-3.89697	0.000152578	0.00161443	0.768335
ANKRD23	-1.57894	-0.0769727	-3.88737	0.000158106	0.00161443	0.736242
CEP131	-0.886784	-0.0253198	-3.8722	0.000167226	0.00161443	0.685686
FARP2	-1.13304	-0.0544646	-3.85372	0.00017901	0.00161443	0.624327
SMTNL1	-0.556317	-0.0428407	-3.85316	0.000179381	0.00161443	0.622459
RPL13A	-1.95771	-0.165742	-3.83917	0.000188844	0.00161462	0.576153
TXLNG	-1.75325	-0.269335	-3.81616	0.000205446	0.00162351	0.50029
FBXL17	-0.922656	-0.0958492	-3.81051	0.000209732	0.00162351	0.481707
MGC16275	-0.973684	0.0208895	-3.79497	0.000221958	0.00162351	0.430729
PRR7	-1.06241	0.0541515	-3.78757	0.00022801	0.00162351	0.406529
RNF2	-1.53124	-0.247444	-3.77651	0.000237356	0.00162351	0.370404
C10orf143	-0.974667	-0.186176	-3.75136	0.000259974	0.00170983	0.288586
CC2D2A	-1.45929	0.0548247	-3.73321	0.000277549	0.00171435	0.229817
TFAP2E	-0.597007	-0.0703471	-3.73006	0.000280712	0.00171435	0.219639
POLR2C	-3.0593	0.376868	-3.69316	0.000320408	0.00175415	0.100908
LY9	-3.788	0.526917	-3.69162	0.000322173	0.00175415	0.0959786
CCDC30	-1.18392	-0.00750238	-3.68534	0.000329475	0.00175415	0.0758738
WSB1	-3.55809	-0.949549	-3.68476	0.000330156	0.00175415	0.074021
ANKRD39	-2.45108	0.0813693	-3.67774	0.000338521	0.00175415	0.0515809
SNX21	-1.88031	-0.0161748	-3.66513	0.000354045	0.00178064	0.0113741
PABPC1	-2.49342	0.180154	-3.59514	0.000453196	0.00210796	-0.209762
RNF111	-2.04453	-0.178428	-3.59397	0.00045506	0.00210796	-0.213433
SLC35A3	-2.46961	0.261898	-3.59331	0.000456108	0.00210796	-0.215491
CCR10	-0.589477	-0.0903442	-3.58489	0.000469747	0.00211386	-0.24185
CLUHP3	-2.93594	0.418051	-3.56613	0.000501541	0.00218054	-0.300414
CXCL13	0.968513	-0.627025	3.56128	0.000510069	0.00218054	-0.315486
POLR1D	-3.14023	-0.0972559	-3.53554	0.000557755	0.00228636	-0.395342
ANKRD11	-2.68306	-0.39232	-3.53145	0.000565707	0.00228636	-0.407985
RAB30-AS1	-1.71649	-0.0334962	-3.51998	0.000588563	0.00228636	-0.443349
TRAPPC2L	-2.36933	-0.168895	-3.51588	0.000596949	0.00228636	-0.455979
MCTP1	-0.671866	-0.032755	-3.50746	0.000614516	0.00228636	-0.481863
MTF2	-3.06808	-0.0865845	-3.50722	0.000615043	0.00228636	-0.482628
DDOST	-3.53843	-0.587838	-3.4193	0.00083014	0.00294706	-0.749871
ZNF208	-1.03095	-0.00896311	-3.41867	0.000831927	0.00294706	-0.751785
RPL23A	-1.53905	-0.378381	-3.41423	0.00084448	0.00294706	-0.76511
LRRC69	-0.738737	-0.0548249	-3.40456	0.000872505	0.00298397	-0.79415
SNORD54	-0.745513	-0.0146883	-3.39368	0.000905028	0.00303451	-0.826692
RPS3A	-1.75284	0.0312305	-3.37719	0.000956532	0.00314552	-0.875885
DPY19L1P1	-0.283763	-0.0617788	-3.36944	0.000981678	0.0031673	-0.898939
SSBP4	-1.56401	-0.348998	-3.32027	0.00115618	0.00366124	-1.04415
OXNAD1	3.54777	0.180759	3.30962	0.00119761	0.00371328	-1.07536
ITIH4	-1.11999	-0.0527701	-3.30499	0.00121605	0.00371328	-1.0889
MRPS27	-2.28379	0.0483976	-3.29688	0.00124901	0.00374702	-1.1126
CD47	-3.16823	-0.607361	-3.22778	0.00156541	0.00461525	-1.31238
DYRK1A	-1.47091	-0.212911	-3.19648	0.00173201	0.00501991	-1.40169
RPL22	-2.25162	0.172267	-3.11483	0.00224744	0.00640519	-1.6312
SLC2A3	2.92654	0.103312	3.08384	0.0024778	0.00694595	-1.71697
RGS1	3.32041	-0.219946	3.0578	0.00268803	0.00741376	-1.78845
PSMD5	-1.84168	-0.283081	-3.01501	0.00306968	0.00833199	-1.90481
FOXJ3	-2.36393	0.156788	-2.99956	0.00321937	0.00860174	-1.94648
ENO4	0.172738	-0.113454	2.86471	0.00484073	0.0127348	-2.30214
BET1	-1.93508	0.116899	-2.85851	0.00493072	0.012775	-2.31815
CCL3L3	1.74916	0.631315	2.84291	0.00516404	0.0130685	-2.35829
RPS16	-1.50003	0.0580106	-2.84077	0.00519684	0.0130685	-2.36378
CXCR3	2.68558	-0.684522	2.79413	0.00596027	0.0147711	-2.48258
RPL30	-1.35625	-0.103481	-2.72105	0.00736354	0.0179881	-2.66518
PIH1D1	-2.2015	-0.347731	-2.66908	0.0085369	0.0205607	-2.7924
GIMAP1	-2.76885	0.143732	-2.65818	0.00880358	0.0209085	-2.81881
RPS23	-1.68852	-0.0984485	-2.64429	0.00915421	0.0214434	-2.85232
TNFAIP3	2.74601	1.69685	2.59412	0.0105282	0.0243287	-2.97206
SKIL	2.44263	0.819925	2.58418	0.0108215	0.0246729	-2.99553
CPNE7	2.02649	0.789815	2.56446	0.0114251	0.0256057	-3.04186
RPL3	-1.0168	0.316824	-2.56112	0.0115301	0.0256057	-3.04966
PDE4DIP	2.51125	0.59272	2.53017	0.012547	0.0273221	-3.12166
GIMAP7	-2.35916	0.0940317	-2.52796	0.0126225	0.0273221	-3.12677
CCL3	1.67689	0.249602	2.47855	0.0144222	0.0304585	-3.23996
RPL34	-1.28641	-0.278836	-2.47841	0.0144277	0.0304585	-3.24028
PXN	-2.34647	-0.234206	-2.45561	0.0153329	0.0319748	-3.29181
KLF2	-1.64748	-0.746847	-2.44205	0.0158951	0.0321433	-3.32226
LDLRAP1	-1.91633	-1.07058	-2.44108	0.0159361	0.0321433	-3.32444
BIN2	-2.66944	0.117929	-2.4401	0.0159777	0.0321433	-3.32664
EEF1G	-1.36794	0.405519	-2.39492	0.0179944	0.0357795	-3.42691
HSPA12A	0.137716	-0.0947715	2.36247	0.0195786	0.038482	-3.49785
PTPN7	2.55764	-0.0189689	2.35802	0.0198052	0.0384851	-3.50751
RPS9	-1.407	0.33947	-2.33661	0.0209284	0.0398978	-3.55377
ABCG1	1.57764	0.199194	2.3353	0.0209988	0.0398978	-3.55659
HLA-DRA	2.16092	-0.48535	2.28749	0.023719	0.0445709	-3.65841
CD101	1.48017	0.154034	2.28206	0.0240468	0.0446294	-3.66985
CLSTN3	1.58398	0.237289	2.27837	0.0242721	0.0446294	-3.67762
SLA	2.23845	0.036278	2.23984	0.0267334	0.0486321	-3.75797
QSOX1	1.53981	0.374407	2.20769	0.0289507	0.0521113	-3.82403
RPS4X	-1.14411	0.516815	-2.19818	0.029637	0.0527909	-3.84341
LYAR	-2.10766	1.50856	-2.1682	0.0318926	0.0562231	-3.90397
IFNG	0.822677	-0.406739	2.15754	0.0327299	0.0571104	-3.92532
RBM39	1.81944	-0.380707	2.14224	0.033965	0.0586668	-3.9558
CAPG	2.03291	0.382088	2.10527	0.0371165	0.0630716	-4.0286
LDHA	2.12239	0.65027	2.10374	0.0372528	0.0630716	-4.0316
ENTPD1	1.66042	0.202285	2.02304	0.0450397	0.0755077	-4.18627
IFIT3	1.29155	-0.00876215	2.00296	0.0471804	0.0783286	-4.22388
TXNIP	-1.11535	0.233417	-1.99748	0.0477797	0.0785608	-4.23409
RIPOR2	-2.13458	-0.778862	-1.97637	0.0501472	0.0816684	-4.27314
ITGA1	1.50901	0.414915	1.92798	0.0559537	0.0902649	-4.36119
MIR497HG	1.63492	-0.18719	1.88893	0.0610418	0.0975529	-4.43073
MALAT1	-0.431707	-0.37597	-1.85733	0.0654387	0.103185	-4.48603
CNN2	-2.0381	0.0865641	-1.855	0.0657727	0.103185	-4.49007
RAB29	-1.73476	0.441583	-1.78907	0.075842	0.1179	-4.60247
CD82	1.93149	-0.209599	1.76204	0.0803223	0.12374	-4.64742
RPS6	-0.624685	0.0440411	-1.71378	0.0888599	0.135195	-4.72606
PLSCR1	1.52688	0.32925	1.71118	0.0893393	0.135195	-4.73023
LY6E	1.75404	-0.572604	1.70226	0.0910042	0.135453	-4.74453
FASLG	1.43615	0.205479	1.69842	0.0917277	0.135453	-4.75065
IL4I1	1.67449	1.56617	1.69758	0.0918859	0.135453	-4.75199
RASA3	-1.34923	-0.459432	-1.68699	0.0939112	0.137255	-4.76882
CCL20	1.4518	0.915032	1.67706	0.0958404	0.138887	-4.7845
OASL	1.40656	-0.340018	1.66557	0.0981133	0.140986	-4.80254
PLAC8	-1.63652	0.190167	-1.5871	0.114826	0.163627	-4.92255
ADD3	-1.75287	-0.548604	-1.56325	0.120331	0.170055	-4.95792
WDR1	-1.63466	-0.264816	-1.53241	0.127756	0.179068	-5.00288
CTSD	1.5277	-0.0927288	1.43106	0.154719	0.215097	-5.14458
ANKRD19P	-0.477917	0.0426846	-1.39392	0.165626	0.228404	-5.19415
CD2	1.25027	-0.460365	1.3813	0.169464	0.231827	-5.21072
SCAMP3	-1.25907	0.161033	-1.36244	0.175324	0.237939	-5.23519
MYBL1	-1.11947	0.844779	-1.35314	0.178268	0.240031	-5.24714
KLRG1	-1.5725	3.20314	-1.33217	0.185045	0.247209	-5.27378
MX1	1.25614	-0.0428432	1.23139	0.220315	0.292046	-5.39619
KLF3	-0.853226	-0.244642	-1.21791	0.225378	0.296458	-5.41184
DUSP4	0.852131	-0.0886984	1.16823	0.244767	0.319505	-5.4681
A2M	-1.2185	2.24275	-1.16013	0.248039	0.321324	-5.47706
NBPF15	-0.15778	-0.438235	-1.14352	0.254841	0.327653	-5.49522
TNF	0.885984	0.292394	1.06661	0.288048	0.367583	-5.57602
PZP	-0.910275	1.71597	-0.896085	0.371799	0.470946	-5.73541
CD96	0.810956	1.42707	0.888794	0.375692	0.472377	-5.74162
BST2	0.897721	-0.305865	0.874609	0.383337	0.476824	-5.75355
PRR29	-0.811203	0.111155	-0.867009	0.387472	0.476824	-5.75986
PTGER2	-0.826807	0.355103	-0.86219	0.390109	0.476824	-5.76384
ITM2C	0.879024	1.57781	0.861692	0.390382	0.476824	-5.76425
LAP3	0.690958	-0.169535	0.836028	0.404614	0.489176	-5.78504
LINC00612	-0.746841	1.17721	-0.833172	0.406217	0.489176	-5.78731
LCP1	-0.553488	1.04474	-0.79117	0.43023	0.514471	-5.81988
IFI44L	0.78629	0.61209	0.747171	0.456257	0.541805	-5.85221
ICAM2	-0.706125	0.0776497	-0.736062	0.462968	0.545983	-5.86008
COTL1	0.740436	-1.69411	0.682069	0.496362	0.580656	-5.89668
TOMM7	-0.509059	-0.0993069	-0.675345	0.500609	0.580656	-5.90104
DPEP2	-0.316866	-0.435283	-0.672273	0.502556	0.580656	-5.90302
SYTL1	0.64494	0.131278	0.64774	0.518251	0.594771	-5.91851
RPL13	-0.193037	0.143258	-0.587643	0.557752	0.635837	-5.95402
BBS2	-0.435511	0.218011	-0.543615	0.587601	0.665429	-5.97786
FTL	-0.257221	-0.0418191	-0.503091	0.615718	0.692683	-5.99817
CD69	-0.454792	1.99086	-0.450531	0.653049	0.729878	-6.02218
GZMK	0.48115	3.27448	0.405244	0.685939	0.75997	-6.04075
KLF3-AS1	-0.19588	-0.0606794	-0.40126	0.688862	0.75997	-6.04229
RBPJ	0.415025	0.373708	0.375009	0.708241	0.776341	-6.05205
PAG1	0.350284	-0.0164053	0.338573	0.735457	0.801039	-6.06452
PLP2	0.33545	0.778927	0.318483	0.75061	0.812369	-6.07084
AES	-0.325363	-0.783387	-0.306154	0.759958	0.817313	-6.07454
GZMB	0.244369	-0.97745	0.274432	0.784171	0.838083	-6.08337
NEAT1	-0.249273	-0.768134	-0.225429	0.821985	0.866676	-6.09511
TBCD	-0.212653	0.896308	-0.2201	0.826125	0.866676	-6.09625
TYMP	-0.157303	-0.112503	-0.220094	0.82613	0.866676	-6.09625
ITGAM	0.0534492	-0.32577	0.191112	0.848725	0.884951	-6.10197
DCDC2B	0.0737075	0.113553	0.162359	0.871266	0.89931	-6.10685
EMP3	-0.119192	-0.0516558	-0.160134	0.873015	0.89931	-6.10719
PDXDC2P-NPIPB14P	-0.0533428	-0.203656	-0.0920369	0.926805	0.949004	-6.11543
TNFSF8	-0.0533275	-1.03467	-0.0567016	0.954867	0.969262	-6.11795
OAS3	-0.0471377	0.342351	-0.0528543	0.957926	0.969262	-6.11815
XBP1	0.0139013	0.623281	0.0122045	0.99028	0.994359	-6.11942
PLEK	0.00784542	1.46089	0.00708282	0.994359	0.994359	-6.11947
CRC
NFKBID	-4.34132	0.50144	-5.90313	5.73688e-08	2.32344e-05	8.08602
GZMB	5.39986	0.576027	5.45207	4.06092e-07	5.89318e-05	6.2433
MANEA	-3.5991	0.137774	-5.4351	4.36532e-07	5.89318e-05	6.17534
ADIPOR2	-2.74342	0.0958797	-5.1408	1.50307e-06	0.000152186	5.01421
GALNT6	-2.7049	0.185684	-4.43957	2.47281e-05	0.00200298	2.39725
NR4A3	-3.07153	0.0926249	-4.37003	3.22405e-05	0.0021459	2.15062
KIR3DL1	-1.91022	0.110085	-4.30198	4.17e-05	0.0021459	1.91169
KIR3DL2	-1.90871	0.120574	-4.29763	4.23882e-05	0.0021459	1.8965
KCNQ1OT1	-2.53918	-0.134499	-4.13354	7.80255e-05	0.00351115	1.33105
PREP	2.77808	-0.0777562	4.08187	9.42782e-05	0.00381827	1.15606
PRDM1	4.00514	0.851979	3.99571	0.000128832	0.00474336	0.867677
HLA-DRA	3.28297	-1.6413	3.95672	0.00014819	0.00487396	0.738568
PER1	-2.93283	0.21179	-3.94155	0.000156448	0.00487396	0.688579
ICA1	-1.65342	-0.757221	-3.88279	0.000192785	0.00531042	0.496227
CXXC1	-3.85592	0.40521	-3.87713	0.000196682	0.00531042	0.477809
HAVCR2	3.46089	-0.205352	3.84436	0.00022077	0.00558825	0.37153
CD160	-3.36717	0.668921	-3.82464	0.000236589	0.0056364	0.307912
KIR2DS4	-1.34992	0.0586959	-3.68515	0.000383595	0.00710438	-0.135465
GZMH	3.13755	-0.438682	3.6845	0.00038445	0.00710438	-0.137503
UBE2S	-1.85159	0.123209	-3.66446	0.00041169	0.00710438	-0.200177
CPNE7	2.70629	0.570801	3.66078	0.000416892	0.00710438	-0.211669
PLEKHG2	-2.36042	-0.0180469	-3.65641	0.000423144	0.00710438	-0.22529
GADD45B	-2.89403	-0.180412	-3.63872	0.000449386	0.00710438	-0.280335
TUBA1C	2.74578	-0.486724	3.62708	0.000467497	0.00710438	-0.316466
GPR35	-2.15135	0.385725	-3.6252	0.000470475	0.00710438	-0.322271
ANKLE2	-2.73793	-0.123585	-3.62141	0.000476562	0.00710438	-0.334023
ADAM19	3.40941	-0.824989	3.61402	0.000488615	0.00710438	-0.356853
ABCD2	-2.17033	-0.271329	-3.60359	0.000506151	0.00710438	-0.389075
OXSR1	-2.42754	0.135601	-3.60209	0.000508709	0.00710438	-0.39368
RASGEF1B	-2.59671	0.543482	-3.57658	0.000554323	0.00729291	-0.472107
KIR2DL4	-1.19201	-0.107996	-3.5745	0.000558222	0.00729291	-0.478505
GSTCD	-1.48184	0.0715289	-3.55906	0.000587867	0.00734665	-0.52573
GNLY	4.2944	1.86133	3.55365	0.000598616	0.00734665	-0.542262
UROS	-2.9482	0.0420941	-3.53734	0.000632118	0.00752964	-0.591931
FAM126A	-2.28617	0.104164	-3.48594	0.000749707	0.00857997	-0.747378
NDUFS8	-3.23059	0.834423	-3.47576	0.000775315	0.00857997	-0.777951
SH3D21	-1.24656	0.0856991	-3.47244	0.000783849	0.00857997	-0.787913
GPR107	-1.73308	-0.351234	-3.42616	0.000912372	0.00966357	-0.925976
TXLNB	-0.961539	0.047931	-3.41794	0.000937194	0.00966357	-0.950363
CRK	-2.03083	0.0917691	-3.40684	0.000971703	0.00966357	-0.983204
ETV3	-1.87413	0.15701	-3.40476	0.000978287	0.00966357	-0.989335
TATDN3	-1.32581	-0.52871	-3.39608	0.00100628	0.00970339	-1.01494
CD82	3.25906	-0.68286	3.38139	0.00105537	0.00975258	-1.05817
PPT2-EGFL8	-2.06505	-0.147702	-3.38018	0.00105954	0.00975258	-1.06175
LAMB1	-1.03484	-0.0445282	-3.36402	0.00111633	0.010047	-1.1091
KLHL24	-2.79028	-0.376988	-3.35002	0.00116786	0.0102822	-1.15001
ITGA5	2.9717	0.623258	3.31941	0.00128838	0.011102	-1.23896
ERP27	-1.95613	-0.259773	-3.30505	0.00134888	0.011191	-1.28049
PERP	3.44134	1.28539	3.30387	0.00135397	0.011191	-1.2839
HNRNPC	1.80204	0.282453	3.29352	0.00139934	0.0113347	-1.31371
LYSMD4	-1.78558	0.0600031	-3.27568	0.00148097	0.0117606	-1.36497
KIAA1147	-1.38021	-0.255843	-3.26176	0.00154767	0.0118603	-1.40477
NAXD	-0.837203	-0.863741	-3.24379	0.00163802	0.0118603	-1.45601
CMPK2	-1.35261	-0.0362874	-3.2424	0.00164523	0.0118603	-1.45997
CARS2	-1.67464	-0.0921418	-3.2403	0.00165613	0.0118603	-1.46593
BRMS1L	-1.46488	0.052296	-3.23624	0.00167743	0.0118603	-1.47746
PTPN13	-2.29794	0.373451	-3.23184	0.00170077	0.0118603	-1.48993
PRG4	-1.84188	-0.296806	-3.22954	0.00171311	0.0118603	-1.49645
MMACHC	-1.15988	-0.11424	-3.22183	0.00175508	0.0118603	-1.51828
ATXN1L	-1.72582	0.0162135	-3.22147	0.00175707	0.0118603	-1.51931
SMG6	-2.28347	-0.0811614	-3.21244	0.0018075	0.0118869	-1.54482
SAMD4B	-1.56583	-0.15689	-3.21029	0.00181972	0.0118869	-1.5509
RNF187	-2.42007	-0.14791	-3.19482	0.00190978	0.0122772	-1.59443
DCTN6	-2.94809	-0.43601	-3.18915	0.00194383	0.0123008	-1.61035
SPATS2	-0.957514	-0.102863	-3.14712	0.00221452	0.01354	-1.72768
H2AFJ	-1.79447	-0.388349	-3.14544	0.00222605	0.01354	-1.73235
PPT2	-1.29431	0.025421	-3.14197	0.00224998	0.01354	-1.74196
ACTR3B	-0.860793	-0.134671	-3.13862	0.00227338	0.01354	-1.75126
TXNDC15	2.4903	0.162656	3.11564	0.00243976	0.0143203	-1.81471
LRWD1	-1.845	0.109458	-3.11057	0.00247803	0.0143372	-1.82869
PAOX	-1.51393	0.21048	-3.08223	0.00270201	0.0154129	-1.90632
GCHFR	2.56068	-0.0776707	3.0642	0.00285428	0.0160158	-1.95546
NARFL	-2.40218	0.241914	-3.06046	0.0028868	0.0160158	-1.96561
ZNF738	-1.54754	0.0421885	-3.02601	0.00320315	0.0174399	-2.05868
PSMD2	-3.27761	0.593635	-3.02215	0.00324053	0.0174399	-2.06905
PRKCE	-1.02729	-0.0430397	-3.01887	0.00327268	0.0174399	-2.07788
VWDE	-1.06203	0.0234705	-3.00976	0.00336337	0.0175681	-2.10231
PARK7	2.97772	-0.944463	3.00257	0.00343656	0.0175681	-2.12155
COPG2	-1.11161	-0.0123839	-2.99871	0.00347636	0.0175681	-2.13183
RAB35	2.3288	0.375119	2.99656	0.00349886	0.0175681	-2.13759
PTMS	1.602	0.298098	2.99515	0.00351362	0.0175681	-2.14135
GFPT2	-1.8027	0.257631	-2.98689	0.00360126	0.0177867	-2.16335
TNKS2	-2.7425	-0.152128	-2.97643	0.00371524	0.0181286	-2.19116
REC8	2.2573	0.277586	2.96654	0.00382596	0.0182377	-2.21735
BTF3	-2.65715	-0.188852	-2.96639	0.00382767	0.0182377	-2.21775
UBXN8	-1.11866	-0.0703755	-2.96039	0.00389634	0.018349	-2.2336
WWTR1	-1.63488	0.311065	-2.93897	0.00415115	0.0193243	-2.29005
CCDC85C	-0.943953	0.00634695	-2.92646	0.00430689	0.0198215	-2.32284
CHKA	-1.28843	0.131785	-2.92196	0.00436417	0.0198594	-2.33459
JAG2	-1.03809	0.0969466	-2.9115	0.00450024	0.0200483	-2.36191
PPP1R10	-2.86208	-0.0412011	-2.91116	0.00450469	0.0200483	-2.36278
TMED8	-0.915889	-0.0932331	-2.87903	0.00494764	0.0217804	-2.44612
SPATA5L1	-1.39842	0.0471318	-2.86969	0.00508371	0.0221387	-2.47021
RPL13P5	-0.906632	0.00827852	-2.86166	0.00520338	0.0224188	-2.49085
SMG1P1	-1.42419	-0.078701	-2.85535	0.00529922	0.0225914	-2.50703
TMEM14EP	-0.856728	-0.00663023	-2.82811	0.00573212	0.0241824	-2.57661
SMG1P3	-1.72226	0.094014	-2.80492	0.00612588	0.0252164	-2.63539
KLRC2	-1.72133	-0.0574519	-2.80289	0.0061614	0.0252164	-2.6405
FTL	-1.72428	-0.109831	-2.80274	0.00616401	0.0252164	-2.64088
NPAS2	-0.702673	0.0147533	-2.78676	0.00645133	0.0261279	-2.68114
PHOSPHO1	-0.836958	0.0432194	-2.77062	0.00675364	0.0268176	-2.72157
SLC27A2	1.6548	-0.113722	2.7706	0.00675406	0.0268176	-2.72162
TYMP	2.12528	-0.648652	2.76105	0.0069392	0.0270902	-2.74548
GPR15	-1.33664	-0.251418	-2.76016	0.0069565	0.0270902	-2.74768
XYLT1	-1.6715	-0.00532768	-2.74461	0.00726847	0.0280355	-2.78635
REL	-2.49489	0.0995528	-2.71401	0.00791961	0.0302589	-2.86187
CCDC138	-0.921155	-0.130408	-2.70847	0.00804321	0.0304439	-2.87549
CCNG2	1.83312	0.394607	2.70008	0.0082333	0.0308749	-2.89602
TOMM7	-1.65428	-0.0856349	-2.68354	0.00862048	0.0320302	-2.93638
TMEM2	-2.23981	-0.992685	-2.67345	0.00886481	0.032617	-2.96091
PHF20	-2.60392	0.091557	-2.66783	0.00900337	0.032617	-2.97451
ADRB1	-1.22147	0.173312	-2.66716	0.00902001	0.032617	-2.97613
CXCR6	3.31416	2.47254	2.65244	0.00939332	0.0336663	-3.01167
FOSB	-2.56574	0.518081	-2.64455	0.00959924	0.0341026	-3.03067
CNIH1	2.03224	-0.505385	2.62742	0.0100602	0.0354294	-3.07171
CXCL13	1.56649	-0.782915	2.62028	0.0102582	0.0358154	-3.08876
ITM2A	-2.80506	-1.74301	-2.61057	0.0105332	0.0364417	-3.11187
C16orf54	2.36562	0.734273	2.60671	0.0106444	0.0364417	-3.12105
NFKBIB	1.66073	0.114877	2.60453	0.0107076	0.0364417	-3.12622
PCNX4	2.22934	0.293249	2.59108	0.0111053	0.0374626	-3.15805
CSRNP1	-2.22975	0.172986	-2.58546	0.0112753	0.0374626	-3.17131
JUN	2.78602	0.204912	2.58514	0.011285	0.0374626	-3.17206
TESC	-1.33111	-0.184085	-2.55728	0.012164	0.0400522	-3.2374
RBKS	-1.61733	0.200524	-2.53394	0.0129476	0.0420351	-3.2917
TCTEX1D4	-1.04776	-0.299076	-2.53318	0.0129738	0.0420351	-3.29346
BRD2	-2.54755	-0.598522	-2.51789	0.013512	0.0434315	-3.32876
SFMBT2	-1.65071	-0.0427436	-2.50687	0.0139127	0.0439912	-3.35411
CD9	1.54613	0.269813	2.50649	0.0139264	0.0439912	-3.35496
TXNDC17	1.90848	-0.0278923	2.50418	0.014012	0.0439912	-3.36028
INPPL1	-1.48931	0.0930472	-2.48676	0.0146709	0.0457056	-3.40009
SAMD3	2.4391	0.836219	2.47385	0.0151767	0.0469204	-3.42943
ACTB	-0.613995	-0.213637	-2.43537	0.0167794	0.0514821	-3.51614
ABCG1	1.56868	-0.578322	2.42711	0.0171423	0.0522002	-3.53459
RASD1	-1.22773	0.301809	-2.42302	0.0173246	0.0523618	-3.54371
KDM5B	2.28809	-0.11856	2.40892	0.0179666	0.0536681	-3.57504
LOC100294362	-1.0126	-0.0308032	-2.40772	0.0180219	0.0536681	-3.57769
GNA15	1.56009	-0.0286387	2.39087	0.0188189	0.0556325	-3.6149
NUP50-AS1	-0.443919	-0.16951	-2.37116	0.019791	0.0580822	-3.65814
ACOT7	-1.01926	-0.305433	-2.35284	0.0207337	0.060411	-3.69803
CIITA	1.21879	-0.026336	2.34567	0.0211133	0.0610778	-3.71357
PLD3	-2.15432	-0.348813	-2.3384	0.0215051	0.06177	-3.72931
TPT1	-0.903458	0.209881	-2.31067	0.023057	0.0657612	-3.78885
MVB12B	-2.0421	1.23929	-2.30113	0.0236137	0.0666751	-3.80919
CSF1	1.3051	-0.441295	2.29955	0.0237067	0.0666751	-3.81255
SCO2	1.46564	-0.605391	2.2962	0.0239057	0.0667711	-3.81967
RPL8	-0.949971	0.0310827	-2.28805	0.0243954	0.0676722	-3.83695
METRNL	1.16483	0.175301	2.27981	0.0249	0.068602	-3.85438
FBXL6	-1.31304	0.0358481	-2.21473	0.0292165	0.0799505	-3.99
MCFD2	-1.18365	-0.50487	-2.20673	0.0297897	0.0806293	-4.00643
METTL26	-2.09093	0.474842	-2.20572	0.0298627	0.0806293	-4.0085
P2RY10	-2.23616	-0.931146	-2.18955	0.0310536	0.0832896	-4.04151
LOC284454	-1.72068	0.828421	-2.17916	0.031841	0.0848396	-4.06262
SLC5A6	-1.91841	0.735807	-2.17194	0.0323983	0.0857601	-4.07723
CTLA4	1.726	-1.96299	2.16408	0.0330146	0.0868242	-4.0931
AKIRIN1	-2.26363	0.137462	-2.14743	0.034354	0.0896795	-4.12653
AMZ2	-2.23444	0.275318	-2.14512	0.0345432	0.0896795	-4.13114
PAK1IP1	-1.18364	-0.0916934	-2.13514	0.0353721	0.0912465	-4.15104
CD38	-1.26381	-0.599831	-2.12975	0.0358277	0.0918368	-4.16177
PFKFB3	2.04288	0.83624	2.12549	0.0361902	0.0921826	-4.1702
HCST	-1.28649	0.782202	-2.11608	0.0370043	0.0936671	-4.18883
ADD3	-2.2466	-0.878962	-2.11164	0.0373935	0.0940643	-4.19759
FAM110A	-1.64523	-0.199752	-2.06402	0.0417951	0.104303	-4.29044
PHTF1	1.58167	-0.29852	2.06213	0.0419788	0.104303	-4.29409
LAIR1	-2.08048	0.795665	-2.05317	0.0428584	0.105839	-4.31133
MSC	1.11531	0.0674451	1.9758	0.0511355	0.125514	-4.45739
EIF4A3	2.0696	0.317652	1.95567	0.0534987	0.130524	-4.49453
PTTG1	-1.12792	-1.25447	-1.94659	0.0545957	0.132158	-4.51118
PLK3	-1.6222	-0.51186	-1.94458	0.0548403	0.132158	-4.51485
MCF2L2	-1.05401	-0.141449	-1.94208	0.0551473	0.132158	-4.51943
BLVRA	0.922034	-0.493182	1.92691	0.0570369	0.135882	-4.54701
RPS8	-1.52678	-0.141273	-1.90999	0.0592094	0.140233	-4.57755
SLC7A5P2	-1.44124	0.255574	-1.90728	0.0595646	0.140254	-4.58243
RPL3	-0.741839	0.233704	-1.87727	0.0636098	0.148468	-4.63591
NFKBIA	2.11095	-0.0241278	1.87599	0.0637864	0.148468	-4.63816
ORMDL2	-1.48911	-0.307821	-1.86529	0.0652872	0.151093	-4.65704
STAM	-1.33091	-1.15914	-1.86053	0.0659635	0.151791	-4.66539
IL21R	1.8132	-0.363627	1.85272	0.0670877	0.153506	-4.67908
RANBP2	-1.87261	0.126141	-1.84117	0.0687778	0.156489	-4.6992
TPI1	1.88017	-0.283719	1.82864	0.0706528	0.159857	-4.72091
GBP2	2.02476	0.129343	1.80315	0.0745967	0.167171	-4.76463
PELO	1.66323	0.59961	1.80243	0.0747109	0.167171	-4.76586
VCP	-1.96846	-0.434727	-1.75814	0.0820066	0.181726	-4.84044
MYADM	-1.64056	0.140345	-1.75752	0.0821133	0.181726	-4.84148
IPMK	-0.946553	0.251457	-1.74628	0.084057	0.185017	-4.86012
DUSP5	-1.08137	0.292694	-1.71304	0.0900312	0.196253	-4.91462
IL21R-AS1	1.45077	-0.384182	1.70986	0.0906192	0.196253	-4.91977
RPS3	-0.650703	0.0563343	-1.70956	0.0906749	0.196253	-4.92026
WDR1	-1.78516	-0.585303	-1.70728	0.0910999	0.196253	-4.92396
AMD1	-1.73588	0.144661	-1.69237	0.0939157	0.200059	-4.948
HSPA1B	1.32669	-0.71165	1.69075	0.0942259	0.200059	-4.9506
ATF7IP2	-1.33269	1.00967	-1.69011	0.0943488	0.200059	-4.95163
RGS16	-1.02763	0.131865	-1.68663	0.0950196	0.200432	-4.95721
EPAS1	1.04044	0.329648	1.68031	0.0962461	0.201967	-4.96731
ZNF365	-0.226404	-0.167455	-1.67728	0.0968397	0.202165	-4.97215
RPL35	-0.802476	0.285232	-1.65555	0.101176	0.208939	-5.00653
GALNT2	1.41727	0.269586	1.65446	0.101399	0.208939	-5.00826
PTGER4	-1.82876	0.878204	-1.65228	0.101843	0.208939	-5.01168
SNX9	1.49284	0.122602	1.65079	0.102148	0.208939	-5.01402
ITGA6	-1.23498	0.0732096	-1.64064	0.104243	0.212152	-5.02989
GIMAP1-GIMAP5	-1.65788	0.609641	-1.61368	0.109977	0.222704	-5.07162
COTL1	-1.70808	-2.48772	-1.61051	0.110668	0.222988	-5.07649
SRSF7	-1.44861	-0.39823	-1.60567	0.111729	0.22376	-5.0839
AP3S1	1.50921	0.245985	1.60169	0.112609	0.22376	-5.08998
SIK1	-1.19935	0.616044	-1.60124	0.112709	0.22376	-5.09067
FAM46C	-1.44393	-0.153778	-1.5968	0.113696	0.22462	-5.09743
BTG2	-1.79889	-0.259021	-1.59242	0.114676	0.225455	-5.10407
RAPGEF6	1.49943	0.262265	1.5864	0.116037	0.227029	-5.1132
KLRG1	1.77579	3.42748	1.56067	0.121992	0.237533	-5.15178
PDCL3	-1.28656	-0.244607	-1.55399	0.123576	0.239465	-5.16169
MIR922	0.519874	-0.0554914	1.54685	0.12529	0.24163	-5.17226
BRE-AS1	-1.26635	0.100725	-1.54425	0.125917	0.24169	-5.17609
ITGB2	1.38696	-1.11396	1.5415	0.126584	0.241824	-5.18014
YPEL5	-1.65686	0.0619814	-1.53565	0.128013	0.243405	-5.18873
SLC7A5	1.35238	0.754961	1.52751	0.13002	0.2453	-5.20062
RGS1	1.53623	-1.32393	1.52671	0.130221	0.2453	-5.20179
CD7	-1.01977	0.0042353	-1.51959	0.131998	0.247497	-5.21213
CYSTM1	-1.40271	0.442499	-1.5081	0.134911	0.251792	-5.22875
PHLDA1	1.50399	-0.127086	1.49515	0.138253	0.256846	-5.24732
CKS2	-0.940974	-0.451899	-1.47786	0.142817	0.262381	-5.27189
MEF2D	0.981335	-0.28898	1.47762	0.14288	0.262381	-5.27223
TNF	1.3935	0.450707	1.47652	0.143176	0.262381	-5.27379
ITK	-1.61654	-1.82209	-1.44636	0.151431	0.275507	-5.31595
ENTPD1	1.44418	-0.20952	1.4454	0.151699	0.275507	-5.31727
RPL29	-0.884801	-0.112691	-1.43997	0.153226	0.277038	-5.32477
DDX24	1.34191	-0.548627	1.41355	0.160826	0.289487	-5.36087
DAPK2	1.12385	0.677446	1.39597	0.16604	0.29755	-5.38454
FOXO1	1.30387	-0.0443625	1.38447	0.169521	0.302449	-5.39986
AK2	-1.44797	0.288057	-1.38112	0.170546	0.302944	-5.40431
IFNG	-1.16863	-0.377957	-1.36963	0.174095	0.307897	-5.41947
SGPL1	-1.12884	0.0314045	-1.35473	0.178778	0.314805	-5.43893
RPUSD1	-0.788607	0.0145668	-1.35179	0.179715	0.315085	-5.44276
C19orf70	-0.856557	-0.193124	-1.34465	0.182003	0.31772	-5.45199
S1PR5	1.3616	1.73563	1.34144	0.183039	0.318157	-5.45614
ATF3	-1.01525	0.525095	-1.33452	0.185285	0.320218	-5.46502
CCL3	1.06567	0.251985	1.33293	0.185805	0.320218	-5.46706
H2AFV	-1.20572	0.0267017	-1.30559	0.194906	0.334479	-5.50171
NDFIP2	1.02811	-0.564701	1.29874	0.197236	0.33705	-5.51028
CLK1	-1.29211	-0.47519	-1.28185	0.203075	0.345569	-5.53123
HLA-F	0.72742	-0.0972881	1.26311	0.209702	0.355353	-5.55418
TCF7	-1.19257	0.126345	-1.25353	0.213148	0.359687	-5.56577
ERAL1	-0.730679	-0.127766	-1.24583	0.215951	0.362905	-5.57504
GZMK	1.2572	2.60405	1.22242	0.22463	0.375931	-5.60285
FOS	-1.60132	0.441432	-1.20981	0.22941	0.382083	-5.61762
RPS21	0.576396	0.144333	1.20777	0.230193	0.382083	-5.62001
EML4	-1.15201	0.224308	-1.20381	0.23171	0.383032	-5.6246
RRAS2	-0.957479	0.983596	-1.19931	0.233448	0.384336	-5.62982
EMP3	0.933102	-0.278465	1.1787	0.241519	0.396012	-5.65344
ADD3-AS1	-0.72745	-0.167716	-1.14957	0.253263	0.413595	-5.68616
C12orf57	0.900295	-0.535559	1.13467	0.259422	0.4215	-5.70258
PTPN22	-1.1467	0.709694	-1.13285	0.260185	0.4215	-5.70458
TRAF1	-0.997683	-0.733651	-1.10794	0.270739	0.436	-5.73153
RPS25	0.551467	-0.169434	1.10666	0.271289	0.436	-5.7329
LYPLAL1	-0.601644	-0.0719015	-1.09945	0.274402	0.43926	-5.74058
TNFAIP3	1.10311	0.298379	1.08318	0.281525	0.448889	-5.75774
H2AFX	-0.590905	0.0251159	-1.0753	0.285017	0.452674	-5.76596
NUP160	0.935215	0.0362284	1.06943	0.287639	0.455055	-5.77205
HSPA1A	0.950871	-0.914492	1.02082	0.309984	0.487156	-5.8212
SRGAP3	0.790926	0.375781	1.02007	0.310336	0.487156	-5.82194
BABAM2	-0.909878	-0.296707	-1.01676	0.311899	0.487719	-5.8252
CDKN1A	-0.888896	0.265208	-1.00981	0.3152	0.490985	-5.83202
KLF2	-0.773296	-0.1259	-0.993505	0.323037	0.501264	-5.84784
RPL19	-0.288795	0.102038	-0.986884	0.326255	0.504325	-5.85419
SH2D2A	0.907292	-0.179713	0.979416	0.32991	0.508037	-5.8613
PSMA1	-0.953485	0.287098	-0.963627	0.337727	0.517951	-5.87617
LDLRAD4	0.840404	-0.517154	0.961265	0.338906	0.517951	-5.87837
RPL34	0.409979	0.227714	0.945637	0.346779	0.52333	-5.89281
ZNRF1	0.631743	0.269839	0.943705	0.34776	0.52333	-5.89458
GMPPB	-0.807955	0.549549	-0.942573	0.348337	0.52333	-5.89562
CD55	0.945419	0.485154	0.94177	0.348745	0.52333	-5.89635
SMAD3	-0.76498	0.367342	-0.939191	0.35006	0.52333	-5.8987
PLAC8	-0.885557	1.04993	-0.93896	0.350179	0.52333	-5.89892
NR4A2	-0.919902	0.335556	-0.929855	0.354849	0.527012	-5.90717
PA2G4	1.06338	0.707579	0.929085	0.355245	0.527012	-5.90786
ITGA1	0.78691	0.467434	0.920869	0.359497	0.531373	-5.91523
SEL1L3	0.742258	-0.50092	0.91618	0.361938	0.533035	-5.91941
ITM2C	-0.9054	0.444061	-0.900904	0.369962	0.542878	-5.93288
RPS27A	-0.301383	0.012049	-0.890729	0.375368	0.548824	-5.94172
PTPN7	0.953741	-0.489345	0.88616	0.377812	0.55041	-5.94566
FGFBP2	-0.305332	-0.334532	-0.877639	0.382397	0.555092	-5.95296
IRF4	0.752953	-0.423066	0.87343	0.384674	0.556403	-5.95654
PLEK	0.961359	1.26576	0.84716	0.399076	0.574879	-5.97849
SESN1	-1.0054	1.66278	-0.84498	0.400286	0.574879	-5.98028
SLC2A3	-0.921253	-0.647617	-0.832246	0.407398	0.581029	-5.99065
RASGRP2	-0.636219	-0.427591	-0.832175	0.407438	0.581029	-5.99071
RPLP2	-0.385358	-0.14702	-0.822404	0.412947	0.585827	-5.99857
RPS24	-0.39812	0.0223244	-0.821081	0.413695	0.585827	-5.99962
RPS18	-0.31453	0.0819502	-0.809348	0.420377	0.590218	-6.00892
CD58	0.821281	-0.672424	0.808479	0.420874	0.590218	-6.0096
KIF5B	0.903421	-0.658196	0.807966	0.421168	0.590218	-6.01001
NAMPT	-0.707899	-0.401353	-0.775529	0.439991	0.61447	-6.03498
MFSD11	0.711989	0.0453877	0.762594	0.447632	0.62137	-6.04466
PPP1CB	-0.729791	-0.586171	-0.761973	0.448	0.62137	-6.04512
RPL14	0.435591	-0.122676	0.755483	0.451864	0.624591	-6.04991
SAMSN1	0.657111	-1.9016	0.719901	0.473388	0.652116	-6.07546
DDIT4	-0.780797	0.532283	-0.709191	0.479977	0.657323	-6.08291
MAFF	0.584361	0.697419	0.708483	0.480414	0.657323	-6.0834
HMGCS1	0.561909	0.11578	0.698655	0.486508	0.661091	-6.09013
STAT4	0.652064	0.520759	0.698243	0.486764	0.661091	-6.09041
LAYN	0.477194	-0.507177	0.696155	0.488065	0.661091	-6.09183
YWHAE	-0.687234	0.302336	-0.689841	0.492009	0.664212	-6.09609
TRAF3IP3	-0.662933	-0.278294	-0.68431	0.495478	0.666295	-6.09979
DNAJA1	0.745874	-0.249441	0.68214	0.496843	0.666295	-6.10124
S1PR1	-0.567473	0.502549	-0.662653	0.509188	0.680598	-6.114
SKIL	0.650281	0.0318241	0.657307	0.512604	0.682909	-6.11744
IVNS1ABP	-0.761252	0.022257	-0.652172	0.515896	0.685042	-6.12072
LPIN1	-0.647011	-0.174628	-0.644171	0.521047	0.689621	-6.12577
MIR636	0.4535	0.240156	0.639247	0.524231	0.691574	-6.12885
RPS3A	0.278789	0.0713063	0.623339	0.534585	0.702944	-6.13864
RPL18	0.287271	0.00250558	0.616081	0.539343	0.706906	-6.14303
CCM2	-0.515549	-0.538422	-0.599225	0.550477	0.718958	-6.15302
PPP1R15B	0.504896	-0.0902866	0.596799	0.552088	0.718958	-6.15443
RPL13	-0.195999	0.108716	-0.580164	0.563204	0.730057	-6.16398
LINC02067	-0.222387	-0.207668	-0.576738	0.565507	0.730057	-6.16591
ZC3H12A	0.561132	-0.0170338	0.574385	0.567091	0.730057	-6.16724
LIME1	-0.567163	-0.629143	-0.572458	0.56839	0.730057	-6.16831
RPS10-NUDT3	0.314963	-0.164388	0.570629	0.569625	0.730057	-6.16933
GAPDH	-0.310828	-0.404938	-0.565876	0.572838	0.73186	-6.17197
OXNAD1	0.569854	-0.545793	0.554984	0.580235	0.738979	-6.17793
MCL1	-0.576657	-0.123403	-0.543587	0.588024	0.74655	-6.18403
CMTM6	0.587511	-0.921885	0.532013	0.595983	0.752403	-6.19011
RPS23	-0.262352	0.129895	-0.531483	0.596349	0.752403	-6.19039
NOP53	-0.50258	-0.164083	-0.523325	0.601991	0.755064	-6.19459
EGR2	0.437301	0.426776	0.523042	0.602187	0.755064	-6.19473
TSPAN32	0.42528	0.0176524	0.515522	0.607409	0.755711	-6.19854
RPL32	-0.223867	0.0794071	-0.515266	0.607588	0.755711	-6.19867
RHOA	0.423823	-0.0620566	0.514241	0.608301	0.755711	-6.19919
UBB	-0.156804	0.0844376	-0.507069	0.613305	0.759597	-6.20276
RNF126	-0.429473	0.441707	-0.484217	0.629368	0.777116	-6.21382
NFKBIZ	-0.547541	0.182946	-0.478249	0.633593	0.779955	-6.21663
SRP14	0.349391	-0.278853	0.46401	0.643722	0.786946	-6.22318
ARID5A	-0.484109	-0.907027	-0.459586	0.646883	0.786946	-6.22518
LINC00861	-0.404975	-0.125039	-0.458008	0.648013	0.786946	-6.22588
ACTR3	0.480162	-1.02497	0.456774	0.648896	0.786946	-6.22643
PIM3	-0.421147	-0.0272737	-0.456647	0.648987	0.786946	-6.22649
EGR1	-0.316963	-0.102353	-0.442258	0.659327	0.797097	-6.23281
CD69	-0.43259	1.59043	-0.428469	0.669298	0.803934	-6.23868
HSPA5	-0.464212	0.782278	-0.427672	0.669876	0.803934	-6.23901
RPL27A	-0.175006	-0.106755	-0.42621	0.670938	0.803934	-6.23962
PPP1R16B	0.393589	0.0197192	0.422561	0.673589	0.80473	-6.24113
VMP1	-0.454655	-0.682832	-0.418491	0.676551	0.805891	-6.2428
TGFBR3	0.356582	0.748327	0.40242	0.688297	0.817478	-6.24925
RPS6	-0.114062	0.119124	-0.394775	0.693911	0.820061	-6.25223
ADGRE5	-0.42448	0.371113	-0.393946	0.694521	0.820061	-6.25255
WDR38	-0.122279	0.0485626	-0.377054	0.706991	0.830598	-6.25892
TFRC	-0.374275	-0.502844	-0.372498	0.710368	0.830598	-6.26058
ITGAE	-0.35138	0.226651	-0.372392	0.710447	0.830598	-6.26062
TPM4	0.400682	-0.0285469	0.368452	0.713372	0.830598	-6.26205
RIPOR2	-0.317737	0.329985	-0.363867	0.716781	0.830598	-6.26369
PTGER2	-0.420603	1.53291	-0.360956	0.71895	0.830598	-6.26472
RPS14	0.143535	0.0169572	0.360331	0.719415	0.830598	-6.26494
NR4A1	-0.297113	-0.0475017	-0.359745	0.719852	0.830598	-6.26515
RGS2	-0.37359	1.32826	-0.349864	0.72723	0.836728	-6.26858
SRSF2	0.33182	0.0273527	0.335087	0.738312	0.847072	-6.27353
RPL36	-0.162951	-0.255505	-0.320921	0.748989	0.856894	-6.27807
SRGN	-0.22697	-0.270459	-0.317952	0.751233	0.85704	-6.279
HSPH1	0.300171	-0.615418	0.310781	0.756662	0.859035	-6.2812
A2M	-0.324416	3.10525	-0.31004	0.757223	0.859035	-6.28143
RPL37A	-0.122661	-0.00598905	-0.303166	0.762439	0.862536	-6.28349
MRI1	0.240077	0.0743656	0.291325	0.77145	0.869714	-6.28693
RPS29	-0.10592	-0.320402	-0.289189	0.773079	0.869714	-6.28754
TLN1	0.271161	0.106153	0.28552	0.775879	0.870446	-6.28857
CTSD	-0.312732	-0.258299	-0.272841	0.785579	0.878894	-6.29203
UBA52	-0.142876	0.0164687	-0.260445	0.795095	0.88709	-6.29527
FOXK1	-0.18118	0.163145	-0.247236	0.80527	0.895111	-6.29855
MYC	0.268536	0.863235	0.245376	0.806705	0.895111	-6.299
RGCC	0.19567	-0.798015	0.23863	0.811917	0.898432	-6.30059
PTGDR	0.184477	0.601571	0.232401	0.816736	0.89934	-6.30203
RPS14P3	0.0953222	-0.0512421	0.23183	0.817178	0.89934	-6.30216
IQSEC1	-0.138457	-0.259165	-0.226158	0.821574	0.901728	-6.30343
PDE4A	-0.148133	0.018237	-0.220364	0.82607	0.904212	-6.3047
SLC1A5	-0.197466	0.226722	-0.21619	0.829312	0.905314	-6.30559
PPP1R15A	0.215048	0.0772637	0.203361	0.839296	0.91375	-6.30822
EZR	0.168654	0.26439	0.198709	0.842923	0.915239	-6.30914
HSP90AA1	0.139385	-0.0159114	0.194048	0.84656	0.91673	-6.31003
LDHA	-0.20352	-0.627667	-0.177494	0.859506	0.928266	-6.31304
GPBP1	-0.181042	-0.303466	-0.166701	0.867966	0.93491	-6.31486
TNFRSF18	0.135136	-0.793838	0.154778	0.877331	0.941723	-6.31674
STK17B	0.100919	-0.645499	0.15273	0.878942	0.941723	-6.31705
LOC100130476	0.137783	0.574595	0.143777	0.885987	0.946767	-6.31835
CAPG	-0.132043	0.466736	-0.132039	0.895238	0.954135	-6.31993
ICAM1	0.116843	0.678613	0.12003	0.904718	0.954762	-6.32141
CCL20	0.111196	0.794111	0.119873	0.904842	0.954762	-6.32143
DUSP10	0.105107	-0.112098	0.118108	0.906236	0.954762	-6.32164
PXN	-0.113717	0.213188	-0.117481	0.906731	0.954762	-6.32171
HADHA	-0.118016	-0.655912	-0.116365	0.907614	0.954762	-6.32184
CPNE2	0.0832375	0.716902	0.108436	0.913883	0.956345	-6.32271
RNF20	-0.0785562	-0.249118	-0.108386	0.913922	0.956345	-6.32271
CD83	0.0932203	0.221677	0.105504	0.916202	0.956345	-6.32302
ZNF331	-0.0898817	-0.480872	-0.0948703	0.924622	0.959604	-6.32406
IDS	0.091188	0.561984	0.0897913	0.928646	0.959604	-6.32452
RASA3	-0.0793276	-0.268253	-0.0892096	0.929107	0.959604	-6.32457
GIMAP4	0.0968447	0.0895734	0.0866222	0.931158	0.959604	-6.32479
RPS20	-0.0408054	0.0603035	-0.0866052	0.931171	0.959604	-6.32479
SERTAD1	-0.0546077	0.098098	-0.0629452	0.949945	0.976466	-6.32653
ELF1	0.0580583	-0.6001	0.0566197	0.954969	0.979146	-6.3269
COL6A2	-0.0232905	0.368265	-0.0475695	0.962161	0.983822	-6.32736
RAP1GAP2	0.029138	0.311256	0.0447676	0.964388	0.983822	-6.32748
ARL4C	0.0431484	1.17909	0.0411791	0.967241	0.984253	-6.32764
CREM	0.0386543	0.230642	0.0379601	0.969801	0.984384	-6.32776
TXNIP	-0.0255381	0.327765	-0.0312802	0.975113	0.984924	-6.32799
ZGPAT	0.0302962	-0.636577	0.0286636	0.977194	0.984924	-6.32806
PZP	-0.0269104	2.578	-0.0266555	0.978792	0.984924	-6.32812
HDAC4	-0.0163229	0.0429735	-0.0235526	0.98126	0.984924	-6.32819
RPL31	-0.0100064	-0.129961	-0.0220036	0.982492	0.984924	-6.32823
TMEM63A	-0.00783844	-0.039575	-0.00880229	0.992996	0.992996	-6.32843
HCC
SLC4A10	-3.0017	6.24021	-6.83425	4.30035e-11	2.82963e-08	14.8174
IL7R	-2.32803	2.64386	-6.07609	3.56465e-09	1.17277e-06	10.6043
ADGRG1	1.58737	-0.521074	5.79128	1.69654e-08	3.72108e-06	9.12135
LYST	2.65406	-0.404286	5.61584	4.31214e-08	6.04458e-06	8.23627
IFNG	1.5536	-0.334956	5.60381	4.59315e-08	6.04458e-06	8.17642
SATB1	-2.75817	2.43468	-5.46955	9.23009e-08	1.01223e-05	7.51524
KLRG1	-2.07319	4.5331	-5.36708	1.55864e-07	1.36317e-05	7.01943
HLA-DRA	1.57563	-1.78068	5.35497	1.65735e-07	1.36317e-05	6.96136
DUSP4	1.01204	-1.40999	5.20304	3.54826e-07	2.46024e-05	6.24203
TNFRSF9	0.94584	-1.20288	5.19247	3.73896e-07	2.46024e-05	6.19261
HAVCR2	1.54522	-0.624514	5.15446	4.50999e-07	2.66277e-05	6.01565
GCG	0.414247	0.0252715	5.13941	4.85612e-07	2.66277e-05	5.94588
HLA-DQB2	0.713996	-0.64314	5.02039	8.66254e-07	4.38458e-05	5.40022
ICOS	1.86819	-1.83464	4.99884	9.60836e-07	4.51593e-05	5.3026
MYO1E	0.831922	-0.242648	4.89612	1.56724e-06	6.87494e-05	4.84209
TBC1D4	1.06806	-2.43874	4.80754	2.37451e-06	9.76516e-05	4.45153
CTLA4	1.01159	-1.88382	4.74434	3.18206e-06	0.000117806	4.17665
HLA-DQB1	1.05409	-1.45944	4.74159	3.22266e-06	0.000117806	4.16474
MYO7A	0.749063	-0.385025	4.68554	4.16689e-06	0.000144306	3.92368
PRSS3P2	0.472541	0.0673155	4.62367	5.51759e-06	0.000178364	3.6605
RGS1	1.95431	-1.72419	4.61676	5.69247e-06	0.000178364	3.63127
TIGIT	1.64449	-2.77455	4.56131	7.30081e-06	0.000205001	3.39828
HLA-DRB5	1.53191	-2.33497	4.55768	7.41992e-06	0.000205001	3.38313
AFAP1L2	1.23241	0.196131	4.55596	7.47724e-06	0.000205001	3.37593
CXCL13	0.701254	-0.235308	4.5068	9.30201e-06	0.000244829	3.17166
PTTG1	0.888555	-1.34563	4.45765	1.15506e-05	0.000292319	2.9693
UBASH3A	2.00947	-0.0758453	4.43122	1.29659e-05	0.000315751	2.86134
PTGIS	0.886125	0.106217	4.42305	1.34362e-05	0.000315751	2.82807
FAM45BP	1.14333	-0.197563	4.39974	1.48696e-05	0.000332621	2.73344
ZEB2-AS1	0.789341	-0.00545898	4.3952	1.51651e-05	0.000332621	2.71508
PTPRN2	0.682086	-0.359845	4.32218	2.07691e-05	0.000431133	2.42181
RIN3	1.41202	-0.121656	4.31997	2.0967e-05	0.000431133	2.41297
CD82	1.68423	-1.91944	4.29871	2.29579e-05	0.000457767	2.32845
TOX2	0.602576	-0.564873	4.28836	2.39919e-05	0.000464314	2.28742
CD27	2.06455	-1.57395	4.24432	2.89093e-05	0.000543495	2.11385
PHEX	0.749052	0.0546406	4.20476	3.41342e-05	0.000623896	1.95932
CSTF3	1.41284	-0.24726	4.13894	4.48793e-05	0.000798124	1.70504
OASL	1.27567	-0.922856	4.12884	4.6789e-05	0.000810188	1.66636
ITGB1	1.59635	-2.94195	4.11209	5.01306e-05	0.000845793	1.60233
HLA-DRB6	1.36897	-2.22727	4.09046	5.47808e-05	0.000896788	1.52004
AKAP5	0.612392	-0.511724	4.0833	5.64065e-05	0.000896788	1.49292
LAT2	0.861837	-0.340724	4.07971	5.72418e-05	0.000896788	1.47929
HLA-DPA1	1.86815	-1.09111	4.06973	5.96205e-05	0.000912333	1.44154
HLA-DRB1	1.55613	-2.63387	4.03907	6.75308e-05	0.00100989	1.32608
SVIP	-1.29844	0.43404	-4.0299	7.00829e-05	0.00102477	1.29172
IL18RAP	-2.01861	3.67517	-4.01848	7.33932e-05	0.00104984	1.24898
TSPAN14	1.81714	-1.21041	4.00151	7.85838e-05	0.00110017	1.18572
CD200	0.455576	-0.294705	3.99348	8.11608e-05	0.00111258	1.15585
KLRC4	1.02703	-0.376782	3.96367	9.14436e-05	0.00119487	1.0455
CD27-AS1	1.79644	-1.42368	3.96213	9.20076e-05	0.00119487	1.03981
CD3G	1.332	-0.26824	3.96049	9.26118e-05	0.00119487	1.03376
GLIDR	0.282286	-0.0679605	3.94958	9.6724e-05	0.00122393	0.993594
MIR155HG	0.991786	-0.405401	3.93224	0.000103619	0.00128644	0.929949
CCR6	-2.00794	2.09169	-3.90615	0.000114878	0.0013998	0.834672
ARID5B	1.28208	-2.90971	3.89445	0.000120295	0.0014378	0.792127
VCAM1	0.371749	-0.146312	3.89011	0.000122366	0.0014378	0.776368
KRT86	0.876195	0.126403	3.86247	0.000136366	0.00157419	0.676413
LOC643733	-1.71662	1.87058	-3.85438	0.000140743	0.00159011	0.647276
ENTPD1	1.25437	-0.820451	3.85106	0.000142578	0.00159011	0.635329
SAMSN1	1.74264	-1.4887	3.83531	0.000151591	0.00166245	0.578814
NCF4	0.937594	-1.02052	3.82889	0.000155416	0.00167645	0.55585
SETD5	1.40348	0.15032	3.80814	0.000168415	0.00178737	0.481841
GPR25	0.760138	-0.130499	3.80308	0.000171744	0.00179377	0.463815
KRT81	0.659907	0.104417	3.79015	0.000180514	0.00185591	0.417957
FAM46C	1.4291	-0.0546163	3.76434	0.000199311	0.00201765	0.326791
CCDC141	0.618035	-1.15576	3.75873	0.000203633	0.00202154	0.307059
LSS	1.06101	-0.0850188	3.75591	0.000205841	0.00202154	0.297141
DNAAF2	1.29907	0.102797	3.73226	0.000225252	0.00217964	0.214283
CLIC3	1.22627	0.458294	3.72443	0.000232053	0.00221291	0.186945
S100A6	-0.783031	0.643605	-3.70502	0.000249756	0.00228966	0.119404
ID3	0.511682	-1.01757	3.70423	0.000250498	0.00228966	0.11668
ADTRP	0.0683867	-0.492647	3.70008	0.000254457	0.00228966	0.102279
IL21R	1.14364	-1.19877	3.69685	0.000257574	0.00228966	0.0910978
CLNK	0.552796	-0.307282	3.69414	0.000260223	0.00228966	0.0817039
LSP1P3	0.272174	-0.130306	3.69337	0.000260979	0.00228966	0.0790393
CYTOR	0.840456	-0.972995	3.66439	0.000291003	0.00251947	-0.0208918
ETV1	0.49866	-0.137836	3.65204	0.000304756	0.00260428	-0.0632446
PGM2	1.10175	-0.235017	3.64373	0.000314354	0.00262373	-0.0916743
PLEKHO1	1.00374	0.00773639	3.64317	0.000315007	0.00262373	-0.0935787
IFNGR1	-1.87689	2.85306	-3.63346	0.000326606	0.00263658	-0.126722
APOBEC3F	1.03725	-0.296997	3.63157	0.000328913	0.00263658	-0.133173
TMIGD2	-1.69715	2.45271	-3.62837	0.000332847	0.00263658	-0.144069
SSH3	0.80639	0.0634666	3.62805	0.000333242	0.00263658	-0.145156
GZMB	1.19589	-0.404676	3.62536	0.000336585	0.00263658	-0.154301
HLA-DQA2	0.535568	-0.764877	3.60518	0.00036272	0.00279911	-0.222797
MIR155	0.480548	-0.22143	3.60286	0.000365842	0.00279911	-0.230642
SESN1	-1.81991	2.51826	-3.58651	0.000388583	0.00286427	-0.285845
FAM49A	0.411623	-0.132012	3.58612	0.000389135	0.00286427	-0.287145
LOC341056	0.220819	-0.0707811	3.58084	0.00039677	0.00286427	-0.304923
HAPLN3	0.967893	-1.26224	3.57985	0.000398213	0.00286427	-0.308246
VMP1	1.69318	-0.742644	3.57945	0.000398795	0.00286427	-0.309581
ENTPD1-AS1	0.918635	-0.54949	3.57831	0.000400476	0.00286427	-0.31343
RORA	-1.40947	1.44161	-3.52481	0.000486888	0.00344487	-0.492029
PPIP5K2	1.32283	-0.291106	3.5171	0.0005007	0.0035049	-0.517574
IKZF2	-1.60818	1.12257	-3.51347	0.000507322	0.00351387	-0.529569
USP34	1.50566	-0.149732	3.49085	0.000550508	0.00377327	-0.604127
NEBL	0.441454	0.0124741	3.47123	0.000590709	0.00400708	-0.668404
KIF2C	0.283402	-0.123662	3.46626	0.000601333	0.00402147	-0.684653
ATP8B4	0.389051	-0.156444	3.46397	0.000606266	0.00402147	-0.692099
PIK3C3	1.33979	-0.13311	3.46173	0.000611166	0.00402147	-0.699436
OGDH	1.52934	-0.779625	3.4389	0.000663027	0.00431952	-0.773634
KCNK5	0.57566	-0.0270585	3.4337	0.000675403	0.00435701	-0.790474
TOR1A	1.40735	-0.339074	3.41378	0.000724837	0.00463051	-0.854764
SLFN12	0.694923	-0.030123	3.40864	0.000738122	0.00464608	-0.871287
TRAT1	-1.7626	0.966926	-3.40739	0.000741395	0.00464608	-0.875312
CSF1	1.0915	-0.5563	3.39477	0.000775121	0.0048116	-0.915767
LOC646214	0.58753	0.10498	3.38802	0.00079377	0.00488132	-0.93738
APOBEC3B	0.249683	-0.131059	3.38384	0.000805499	0.00489793	-0.950712
GOLIM4	0.623259	-0.0778303	3.38085	0.000813998	0.00489793	-0.960251
PSAT1	0.41058	-0.3444	3.37918	0.000818803	0.00489793	-0.9656
IL18R1	-1.64488	1.23238	-3.37629	0.000827146	0.00490326	-0.974811
JAK3	1.60101	-0.362	3.37201	0.000839643	0.0049329	-0.988434
APOBEC3D	1.12317	-0.234439	3.36618	0.000856942	0.00495566	-1.00696
MYBL1	-1.42113	1.68238	-3.36314	0.000866103	0.00495566	-1.01662
LIMK1	1.04366	0.345859	3.36314	0.000866111	0.00495566	-1.01662
RBBP6	1.16811	-0.0742359	3.35846	0.000880366	0.0049938	-1.03145
SARDH	0.794029	-0.383629	3.35256	0.000898682	0.00505412	-1.05014
KLRB1	-0.906673	5.31615	-3.33947	0.0009406	0.00524504	-1.09152
TIGD6	0.682753	-0.108473	3.32345	0.000994331	0.00549807	-1.14191
ETV7	0.519405	-0.577924	3.3045	0.00106159	0.0057859	-1.20123
ADGRG5	1.16027	0.434665	3.30127	0.00107348	0.0057859	-1.21133
PARPBP	0.299021	-0.245322	3.30112	0.00107405	0.0057859	-1.2118
KLRC3	0.529216	-0.236493	3.29909	0.00108156	0.0057859	-1.21812
TCAF2	0.798592	-0.146003	3.2864	0.00112978	0.00587255	-1.25763
EEF1G	-0.57412	0.294189	-3.2838	0.00113988	0.00587255	-1.26568
TNS3	0.393291	-0.256429	3.28343	0.00114133	0.00587255	-1.26683
NBL1	0.633415	0.0898387	3.28135	0.00114951	0.00587255	-1.2733
A2M	-1.30125	3.22749	-3.27856	0.00116053	0.00587255	-1.28194
PTTG3P	0.189523	-0.132385	3.27804	0.00116262	0.00587255	-1.28356
SRSF7	-1.11704	0.328235	-3.27431	0.00117756	0.00587255	-1.29512
FAM174B	0.461354	-0.139809	3.27171	0.00118808	0.00587255	-1.30317
CD74	1.15226	-0.702614	3.2704	0.00119339	0.00587255	-1.30721
CHMP2A	1.41288	-0.487549	3.27036	0.00119356	0.00587255	-1.30734
GPR171	-1.46326	3.07613	-3.26978	0.00119593	0.00587255	-1.30913
SMYD4	0.899944	-0.0899639	3.26429	0.00121856	0.00593935	-1.32609
KLHL21	1.04236	-0.112344	3.2524	0.00126894	0.00613945	-1.36274
PDCD1	1.24631	-0.710359	3.24689	0.00129296	0.00621	-1.37969
MS4A6A	0.683049	-0.0598989	3.23414	0.00135012	0.00643754	-1.41879
CHIC2	1.27069	0.186601	3.22802	0.00137838	0.006525	-1.4375
CCND2	1.55272	0.052658	3.22059	0.00141341	0.00664301	-1.46016
ICAM2	-1.43285	-0.176298	-3.21818	0.00142493	0.00664969	-1.4675
GPR174	1.34882	-0.279081	3.20944	0.00146755	0.00678036	-1.49411
SLC35A2	0.887296	-0.0110615	3.20742	0.00147756	0.00678036	-1.50024
C19orf35	0.424979	0.0510151	3.2046	0.00149163	0.00678036	-1.50879
CRAMP1	0.697659	-0.110381	3.20306	0.00149939	0.00678036	-1.51348
HERC5	0.956194	0.101765	3.20206	0.00150446	0.00678036	-1.51652
COQ8B	0.837455	-0.136651	3.1975	0.00152763	0.00678109	-1.53031
COTL1	1.55409	-2.12428	3.19735	0.00152842	0.00678109	-1.53078
IMPDH1	-1.17046	0.275818	-3.19597	0.00153553	0.00678109	-1.53497
MCPH1	1.14067	-0.112472	3.19077	0.00156251	0.00682647	-1.55067
FAM86C2P	0.350892	0.037311	3.19	0.00156656	0.00682647	-1.55301
IDH2	1.59491	-0.600326	3.18705	0.00158211	0.00684886	-1.56192
RPLP2	-0.483876	0.257704	-3.18346	0.00160124	0.00688638	-1.57276
BST2	1.44461	-0.28675	3.15687	0.00174963	0.00745302	-1.65262
CEBPD	-1.20143	1.48561	-3.15584	0.00175565	0.00745302	-1.65571
ARHGEF3	1.54098	0.273229	3.1529	0.00177288	0.00747793	-1.66451
INTS5	0.935672	0.0654778	3.14752	0.00180479	0.0075405	-1.68056
BCL2L11	0.892406	-0.464798	3.14655	0.00181064	0.0075405	-1.68348
SPATA2L	-0.896956	0.272472	-3.14425	0.00182445	0.00755023	-1.69032
SPG20	-1.10224	0.284114	-3.13912	0.00185569	0.00760101	-1.7056
SNORA70	-1.19303	0.480327	-3.13845	0.00185982	0.00760101	-1.7076
ELP4	0.825754	-0.201561	3.13266	0.00189574	0.00769998	-1.72481
NCR1	0.445891	-0.0997469	3.12926	0.00191716	0.00773921	-1.73492
CANT1	0.90504	0.0133059	3.12427	0.00194893	0.00781949	-1.7497
EGFL8	0.680978	-0.099504	3.11914	0.00198213	0.0079045	-1.76489
LOC728989	0.0701247	-0.150846	3.1159	0.00200338	0.0079411	-1.77448
TIGD1	-0.633145	-0.181067	-3.11084	0.00203697	0.00802589	-1.78942
PARP8	-1.20986	2.27257	-3.10578	0.00207106	0.0080761	-1.80434
TAF1C	1.13412	0.0788651	3.10531	0.00207426	0.0080761	-1.80573
SORL1	-1.49431	0.752499	-3.1013	0.00210168	0.00809445	-1.81753
CD63	1.40008	0.415533	3.09936	0.00211511	0.00809445	-1.82325
RSBN1L	1.04114	-0.118546	3.0981	0.00212387	0.00809445	-1.82696
NCAM1	-0.984419	0.76528	-3.09513	0.00214459	0.00809445	-1.83568
LAYN	0.55897	-0.811027	3.09311	0.00215878	0.00809445	-1.8416
ACP5	1.0158	-1.14929	3.09233	0.00216428	0.00809445	-1.84389
REEP3	-1.07168	0.0888506	-3.09222	0.00216508	0.00809445	-1.84422
USB1	1.0465	-0.350529	3.0865	0.00220594	0.0082006	-1.86101
ASB2	0.8118	-0.738243	3.08296	0.00223153	0.00824915	-1.87136
CLPTM1	1.17821	-0.167624	3.07099	0.0023202	0.00849696	-1.90633
RPS14P3	-0.42218	0.166117	-3.07043	0.0023244	0.00849696	-1.90795
BAD	0.949997	-0.0322633	3.06567	0.00236061	0.00854665	-1.92181
SYT11	0.942379	-0.929937	3.06523	0.00236397	0.00854665	-1.92309
ITGAE	1.16778	-0.0288889	3.05774	0.0024221	0.00870898	-1.94487
RNF10	1.47311	-0.181754	3.04842	0.00249622	0.0089267	-1.97189
BBIP1	-1.14701	1.19368	-3.04184	0.00254986	0.00906924	-1.99094
PRKAG1	1.12898	-0.298431	3.0385	0.00257746	0.00911812	-2.00059
ZNF611	1.04711	0.108747	3.0355	0.00260251	0.00915637	-2.00925
EIF4EBP1	0.646307	-0.108377	3.03257	0.00262715	0.00915637	-2.01769
DLGAP5	0.0683959	-0.111869	3.03048	0.00264487	0.00915637	-2.02371
SNORD36B	0.410491	0.0679384	3.02902	0.00265736	0.00915637	-2.02792
CD38	0.62831	-0.32052	3.02896	0.00265785	0.00915637	-2.02809
FAM49B	1.41074	-0.112184	3.02607	0.00268262	0.00919357	-2.0364
S100A11	1.13097	-0.891305	3.02189	0.00271891	0.00923261	-2.04842
PTTG2	0.0663614	-0.0733371	3.02107	0.00272604	0.00923261	-2.05077
CNTD1	1.17984	-0.334852	3.01949	0.00273987	0.00923261	-2.0553
APTR	0.995476	-0.191912	3.01832	0.00275014	0.00923261	-2.05864
IL2RB	1.52408	-0.339096	3.01636	0.00276749	0.0092437	-2.06427
PHLDA1	0.843524	-0.759851	3.01348	0.00279316	0.00928232	-2.07253
ZNF683	0.674642	-0.341532	3.01065	0.00281854	0.00931958	-2.08062
PAF1	-1.22314	0.0124504	-3.00612	0.00285972	0.00940849	-2.0936
TRAF3IP3	1.25093	-0.767704	2.99472	0.00296567	0.00966041	-2.12612
CXCR3	1.11008	-2.39954	2.99411	0.00297139	0.00966041	-2.12784
MAPKAPK5-AS1	-1.11295	-0.176378	-2.99317	0.00298034	0.00966041	-2.13053
FTL	-0.528156	0.194817	-2.98861	0.00302392	0.00969317	-2.1435
IL21	0.0520021	-0.0842338	2.98678	0.00304155	0.00969317	-2.1487
BRIP1	0.310652	-0.0917157	2.98531	0.00305577	0.00969317	-2.15287
OAS3	0.940693	-0.675548	2.98449	0.00306373	0.00969317	-2.15519
EXOC5	1.24032	0.0819446	2.98399	0.00306865	0.00969317	-2.15662
FUT8	0.916212	-0.559151	2.9822	0.00308611	0.00969317	-2.16169
RUNX2	-1.38011	1.97479	-2.98144	0.00309357	0.00969317	-2.16385
FCRL3	0.772406	-1.00408	2.96626	0.003246	0.0101226	-2.20679
GNPTAB	1.30958	0.262589	2.96344	0.00327503	0.010165	-2.21474
RPL10	-0.413903	0.204411	-2.96078	0.00330267	0.0102026	-2.22224
PLPP1	0.840213	-0.335546	2.95571	0.00335594	0.0103187	-2.23652
IL6ST	0.953788	-1.28143	2.94813	0.00343698	0.0105049	-2.2578
DNAH8	0.0803627	-0.181651	2.94688	0.00345056	0.0105049	-2.26131
AP1S2	1.05004	-0.191715	2.94427	0.003479	0.0105049	-2.26863
TMEM128	1.20673	0.394828	2.94414	0.00348034	0.0105049	-2.26897
TARS	1.17138	-0.171815	2.93899	0.0035371	0.0106274	-2.28339
COPZ1	1.46541	-0.200224	2.93249	0.00360995	0.010797	-2.30156
PMS2P9	0.397658	0.0772567	2.91863	0.00376994	0.0111208	-2.34018
RET	-0.140706	0.04271	-2.91854	0.00377099	0.0111208	-2.34043
PRR29	-1.2338	-0.254535	-2.91851	0.00377127	0.0111208	-2.3405
ZDHHC7	0.809814	-0.0535512	2.91728	0.00378582	0.0111208	-2.34392
TC2N	-1.2668	1.96566	-2.91124	0.00385779	0.0112365	-2.36069
LINC00861	-1.18074	-0.0845749	-2.91111	0.00385933	0.0112365	-2.36104
MARS2	0.519267	-0.130448	2.90915	0.00388297	0.0112555	-2.36648
RTKN2	0.298359	-1.06712	2.90615	0.00391936	0.0113111	-2.37478
ARID5A	1.41271	0.07236	2.90199	0.00397041	0.0114084	-2.38629
CD86	0.171328	-0.0740719	2.89974	0.00399826	0.0114385	-2.39251
CHCHD10	0.46832	0.0328471	2.89582	0.00404727	0.0115286	-2.40334
TRAM1	-1.32024	0.427141	-2.89068	0.00411225	0.0116632	-2.41751
ZNHIT1	1.0069	-0.441591	2.8723	0.0043525	0.0122916	-2.46796
FAM120B	1.36657	-0.370269	2.86351	0.00447192	0.0125749	-2.49199
UBASH3B	0.967037	-0.14555	2.8545	0.00459742	0.0128533	-2.51655
ADCY3	0.621108	-0.303493	2.85361	0.00460999	0.0128533	-2.51897
CCM2	1.13111	-1.26929	2.85043	0.00465508	0.0129049	-2.52761
GABARAPL1	1.14248	0.382677	2.84955	0.00466773	0.0129049	-2.53001
RHOH	1.43797	-0.768859	2.84682	0.00470682	0.0129585	-2.53741
S100PBP	1.14227	0.214816	2.84217	0.00477431	0.013055	-2.55003
SCARNA22	0.0551884	-0.0399439	2.84168	0.00478153	0.013055	-2.55137
IFI16	1.23707	-0.507544	2.83591	0.00486646	0.0131997	-2.56698
VDR	0.369946	-0.538235	2.83536	0.00487465	0.0131997	-2.56847
ZNF594	0.469895	-0.00143399	2.82698	0.00500067	0.0134854	-2.59109
RSAD2	0.664524	0.0474656	2.82441	0.00504006	0.0134927	-2.59804
PLEC	0.992985	-0.669451	2.82412	0.00504437	0.0134927	-2.59879
CPNE8	0.257584	-0.191398	2.8122	0.00523042	0.0139337	-2.63086
IL2RA	0.592522	-1.59249	2.80918	0.00527843	0.0140049	-2.63895
IER5	0.84728	0.238928	2.80167	0.00539976	0.0142692	-2.65905
GMDS	0.858242	-0.133348	2.79382	0.00552924	0.014553	-2.68001
DPP4	-1.4887	2.99287	-2.7848	0.00568152	0.0148813	-2.70402
LOC100507346	0.599342	0.261897	2.78377	0.00569921	0.0148813	-2.70677
RAD23B	0.737551	0.0300152	2.7725	0.00589524	0.0153323	-2.73664
ROGDI	0.703301	0.107011	2.76695	0.00599421	0.0155058	-2.75134
GZMK	-1.35482	3.37094	-2.76612	0.00600909	0.0155058	-2.75353
CEP55	0.0568026	-0.18306	2.76013	0.00611767	0.0157243	-2.76933
LDLRAD4	0.671103	-0.716547	2.75193	0.00626918	0.0160511	-2.79091
UPF2	-0.957091	0.015848	-2.74686	0.00636451	0.016232	-2.80422
TBCD	1.22859	-0.0111462	2.74545	0.00639129	0.0162373	-2.80792
B3GALT2	-1.05754	1.01304	-2.73574	0.00657841	0.0165599	-2.83335
C2orf15	-0.374124	0.0422877	-2.73487	0.00659536	0.0165599	-2.83562
PPM1G	1.16783	-1.08354	2.73478	0.00659706	0.0165599	-2.83584
TTLL4	0.520948	-0.182427	2.73351	0.00662194	0.0165599	-2.83916
LAIR2	0.357116	-0.795035	2.73239	0.00664409	0.0165599	-2.8421
WHRN	0.654751	-0.199409	2.73004	0.00669047	0.0166126	-2.84823
CKAP2	0.807278	-0.535301	2.71612	0.00697146	0.0171404	-2.88445
BECN1	1.30824	-0.386189	2.71612	0.00697148	0.0171404	-2.88445
FAM3C	0.75349	0.242728	2.71565	0.0069812	0.0171404	-2.88567
KLRC2	0.527895	-0.0708292	2.7023	0.007261	0.0177611	-2.92024
RTCB	1.18786	-0.116207	2.69472	0.00742428	0.0180932	-2.93978
KMT5A	-0.582941	0.207588	-2.68746	0.00758393	0.0184141	-2.95848
UBL5	0.775436	-0.0455105	2.68348	0.00767259	0.0185609	-2.96868
EFHD2	1.04457	-0.35842	2.67954	0.00776144	0.0187071	-2.97879
STK16	0.730421	-0.424212	2.66862	0.00801227	0.0192411	-3.0067
ZNF197	0.531016	-0.171827	2.66501	0.00809683	0.0193735	-3.01591
SDC4	0.443496	-0.605456	2.65046	0.00844591	0.0201355	-3.05291
TBC1D31	-1.27903	2.08668	-2.64537	0.00857123	0.0203022	-3.06582
SLCO4A1-AS1	0.0422925	-0.134395	2.64511	0.00857753	0.0203022	-3.06646
COPS3	-1.26545	0.483193	-2.64267	0.0086383	0.0203728	-3.07264
CDC45	0.0505663	-0.103386	2.64124	0.00867396	0.0203838	-3.07625
MIR4707	0.319286	-0.212708	2.63809	0.00875314	0.0204967	-3.08421
PDE4A	-0.682418	-0.060934	-2.61073	0.00946864	0.0220935	-3.15293
GNB1	-1.07489	-0.0382545	-2.60948	0.00950269	0.0220946	-3.15607
UBE2Z	1.03306	0.11016	2.60736	0.00956047	0.0221507	-3.16136
C9orf84	0.495	0.117125	2.60298	0.00968078	0.0223507	-3.17229
NR4A2	0.899819	0.0811416	2.59568	0.00988422	0.0227339	-3.19045
CXCL10	-0.147245	0.0405274	-2.59456	0.00991585	0.0227339	-3.19324
INPP4B	1.25252	-1.21753	2.5808	0.0103112	0.0235581	-3.22734
HNRNPK	1.07382	-0.288493	2.57666	0.0104327	0.0237534	-3.23756
DENND1B	0.991355	-0.0572082	2.57344	0.0105284	0.0238887	-3.24552
RPL13	-0.283224	0.21205	-2.56535	0.0107716	0.0243565	-3.26542
ATP6V1A	0.959753	-0.101775	2.56233	0.0108639	0.0243938	-3.27284
RAP1GAP2	0.654896	-0.0418994	2.56188	0.0108778	0.0243938	-3.27396
WDR83	0.925577	-0.039424	2.56117	0.0108993	0.0243938	-3.27568
XCL1	0.341631	-0.287669	2.53688	0.0116687	0.0260272	-3.33502
CD160	-1.2887	2.69487	-2.53484	0.0117357	0.0260881	-3.34
COL9A2	-0.0695499	-0.366582	-2.52243	0.0121492	0.026905	-3.37008
ADAT2	0.59578	-0.364331	2.52137	0.012185	0.026905	-3.37263
SLAMF7	-1.20029	3.10173	-2.51892	0.0122686	0.0269991	-3.37857
JAML	-1.06322	3.34963	-2.51559	0.0123825	0.027159	-3.38659
AP3S1	1.09589	0.542428	2.50725	0.0126726	0.0277029	-3.40668
GFM2	0.855468	0.0197204	2.50124	0.0128854	0.0280749	-3.42112
TBL1XR1	1.14126	-0.650734	2.47763	0.013752	0.0298642	-3.47749
PRRC2A	1.01429	0.0372411	2.4728	0.0139354	0.0301629	-3.48896
MMEL1	-0.40357	-0.212239	-2.46985	0.0140487	0.0303084	-3.49596
CX3CR1	0.650098	-0.644827	2.46791	0.0141235	0.0303701	-3.50055
TNFSF13B	0.747567	0.32158	2.46397	0.0142769	0.0305999	-3.50989
STAT4	-0.783124	1.34017	-2.40457	0.0167708	0.0358285	-3.64871
CACNA2D4	-0.745687	0.57777	-2.40006	0.0169751	0.0361475	-3.65913
EZR-AS1	0.724587	-0.283398	2.37425	0.0181863	0.0386018	-3.71833
PLXDC1	-0.80004	0.287209	-2.37027	0.0183793	0.0387717	-3.72738
SLAMF1	-1.08411	1.41282	-2.37017	0.0183842	0.0387717	-3.72761
GIMAP7	-0.849208	0.443971	-2.36513	0.0186321	0.0390665	-3.7391
PPP1R10	0.975024	0.288205	2.36491	0.0186427	0.0390665	-3.73958
PSTPIP1	1.17186	0.0683516	2.36187	0.0187937	0.0392581	-3.7465
MIAT	0.938972	-0.960664	2.35537	0.0191198	0.0398128	-3.76124
RPL39	0.4291	-0.00175963	2.34441	0.0196807	0.040832	-3.78599
IFNAR2	1.00007	-0.432332	2.34339	0.0197334	0.040832	-3.78828
TGFBR3	1.04974	0.0734953	2.33667	0.0200856	0.0414305	-3.80342
CAMK1	0.607709	-0.287143	2.31486	0.0212656	0.0437274	-3.85219
TYW3	0.705417	0.0522352	2.31327	0.0213543	0.043773	-3.85574
OR51B6	0.0621715	-0.0106353	2.29255	0.0225353	0.0460505	-3.90163
HLA-A	0.173118	-0.0335438	2.28623	0.0229071	0.0466652	-3.91556
MALAT1	-0.184021	-0.0617295	-2.27813	0.023391	0.0475039	-3.93335
RIPK3	0.830995	-0.122699	2.27525	0.0235654	0.0477108	-3.93966
FYB	0.875889	-1.49979	2.25882	0.0245809	0.0496142	-3.97551
NOSIP	0.935801	-0.769331	2.25241	0.0249875	0.0502807	-3.98944
CD40LG	-1.18134	1.39602	-2.23779	0.0259367	0.0520316	-4.02105
PAM	0.902513	-0.451006	2.23399	0.0261884	0.0523768	-4.02923
EDARADD	0.487048	-0.512652	2.23244	0.0262913	0.0524233	-4.03255
MYL12B	0.583892	-0.0766318	2.22301	0.0269271	0.0535289	-4.05277
JAKMIP2-AS1	0.449821	0.0548653	2.21939	0.0271754	0.0538598	-4.06054
DLEU2	0.653835	-0.234858	2.20693	0.0280428	0.0554119	-4.08709
PZP	-0.93821	2.57839	-2.20419	0.0282369	0.0556284	-4.09292
PAXIP1-AS1	-0.627842	0.0614279	-2.20136	0.0284387	0.0558586	-4.09893
TOX	0.80587	-0.600417	2.19277	0.029058	0.0569052	-4.11711
TYMP	0.632939	-0.91871	2.18577	0.0295711	0.0577383	-4.13186
RPL18	-0.366904	0.0885607	-2.18311	0.0297684	0.0578843	-4.13747
ZNF770	-0.815191	0.0875762	-2.18239	0.0298218	0.0578843	-4.13898
MIR3615	0.572626	-0.137253	2.18067	0.0299501	0.0579623	-4.14259
SNORA5C	0.528195	-0.0752179	2.17357	0.0304847	0.0588239	-4.15749
DENND4B	0.888863	-0.272757	2.16097	0.0314544	0.060512	-4.18383
GNB2	0.748597	0.16684	2.15983	0.0315435	0.060512	-4.18621
PAPOLA	1.07232	-0.131467	2.15181	0.032175	0.0615441	-4.20286
ZC3H12D	0.180545	-0.871015	2.15017	0.0323058	0.0616151	-4.20627
PFN1	0.241991	-0.0825941	2.14458	0.0327544	0.0622902	-4.21784
NDUFA9	0.988918	0.0912183	2.14154	0.0330003	0.0625769	-4.22412
PNRC1	-0.892543	0.287508	-2.13929	0.0331841	0.0627447	-4.22878
B3GNTL1	0.721889	-0.0516637	2.13699	0.0333721	0.0629194	-4.23351
NR4A3	0.298843	0.00922691	2.12672	0.0342238	0.0643407	-4.25463
ANKRD55	0.0361182	-0.205776	2.12112	0.0346959	0.0650075	-4.2661
IL23R	-0.977645	1.84825	-2.12005	0.0347865	0.0650075	-4.26828
RNF149	-0.875953	0.54077	-2.11901	0.0348749	0.0650075	-4.2704
LTB	-0.839963	0.814101	-2.11238	0.035444	0.0658818	-4.28394
DGCR5	-0.0356446	-0.0771161	-2.10911	0.035727	0.0662207	-4.29059
CCL3	0.582936	0.0954693	2.10113	0.0364275	0.0673295	-4.30682
CTSH	-0.90048	1.07553	-2.09335	0.0371205	0.0684182	-4.32255
BNIP3	-0.59044	-0.202286	-2.08837	0.0375709	0.0690548	-4.3326
43896	-0.971469	0.307304	-2.08418	0.0379528	0.0694614	-4.34104
NUDT14	0.430179	-0.25321	2.08363	0.0380032	0.0694614	-4.34214
COLQ	-1.07579	3.71923	-2.04549	0.0416403	0.0758983	-4.41814
RPS3	-0.184378	0.0874116	-2.03734	0.0424551	0.0771698	-4.43421
NR4A1	0.385624	0.0097068	2.02416	0.0438004	0.0793958	-4.46005
PPP1R15B	-0.781796	0.0998399	-2.01603	0.0446486	0.080711	-4.47591
KRR1	-0.882137	0.166387	-2.00195	0.0461504	0.0831972	-4.50324
SRRM1	-0.824972	-0.0288044	-1.99216	0.0472205	0.0848936	-4.52214
SSBP3	0.475143	0.139921	1.9889	0.047581	0.0853087	-4.52841
IL10RA	1.01473	-1.7482	1.98295	0.0482443	0.086263	-4.53981
CAP1	0.71518	-0.037284	1.97604	0.0490259	0.0874001	-4.55304
ADAM19	0.788913	-0.418765	1.97499	0.0491459	0.0874001	-4.55505
ZNF827	0.523761	-0.0753247	1.96929	0.049799	0.0883228	-4.5659
HLA-L	0.214856	0.122931	1.96469	0.0503323	0.0890287	-4.57465
CCL20	0.64837	0.239278	1.96318	0.0505088	0.0891013	-4.57752
KDM2A	0.868049	-0.0456234	1.94725	0.0523971	0.0921852	-4.60763
RASGEF1B	0.417731	0.142877	1.9446	0.0527165	0.0924999	-4.61261
SLC2A3	0.85761	0.52951	1.93374	0.0540445	0.094578	-4.63297
C11orf21	0.725841	0.48723	1.92921	0.0546059	0.0953069	-4.64142
CD2	0.63939	-0.363783	1.90146	0.0581583	0.101239	-4.69284
TCF7	-0.76524	-0.129472	-1.89682	0.0587703	0.102034	-4.70136
RPS6	-0.20288	0.0681526	-1.86057	0.0637405	0.110372	-4.76725
TNFSF9	0.247558	0.0854494	1.84635	0.0657825	0.113609	-4.79275
GALM	0.859381	-0.141872	1.8358	0.0673343	0.115984	-4.81157
SNHG16	-0.739345	0.53273	-1.82431	0.0690568	0.118641	-4.83193
TNFAIP3	0.908503	0.0702346	1.81063	0.0711551	0.121927	-4.856
MTERF1	0.559582	0.0331306	1.80097	0.0726676	0.124196	-4.87288
S1PR1	0.628905	-0.915815	1.79577	0.0734932	0.125281	-4.88194
SAMD3	0.869134	0.505054	1.79107	0.0742462	0.126165	-4.89011
DNAJA1	-0.882865	-0.0819328	-1.79014	0.0743951	0.126165	-4.89172
YIPF3	0.78421	-0.373311	1.78032	0.0759915	0.128541	-4.9087
LPIN2	0.787168	0.414902	1.77309	0.0771842	0.130224	-4.92115
LITAF	0.939095	-0.462724	1.76992	0.0777119	0.130779	-4.92659
RPL7A	0.446318	0.0139577	1.75948	0.0794715	0.133399	-4.94444
AHNAK	0.829259	-0.0553254	1.75642	0.0799919	0.13393	-4.94964
GTF2I	0.670931	0.253066	1.75289	0.0805984	0.134603	-4.95566
PPP1CB	0.774905	-0.169495	1.74737	0.081552	0.135851	-4.96501
PLP2	-0.812787	-0.602327	-1.7394	0.0829446	0.137822	-4.97847
ENOSF1	-0.541971	-0.303895	-1.7123	0.0878299	0.145572	-5.02381
DKK3	-0.727017	1.37897	-1.70504	0.0891771	0.147434	-5.03584
ANXA2P3	0.0876229	-0.0374814	1.70151	0.0898373	0.148153	-5.04166
SERINC1	0.826641	-0.575741	1.69612	0.0908544	0.149456	-5.05054
MIR4632	0.504689	-0.363348	1.69258	0.0915279	0.150188	-5.05636
NFKBIZ	0.618378	-0.321254	1.68527	0.0929304	0.15211	-5.06833
CKS2	0.359341	-0.32709	1.66121	0.0976699	0.159471	-5.10737
HNRNPLL	0.740177	-0.509119	1.65819	0.0982794	0.160069	-5.11224
ARHGAP9	0.775886	-0.863504	1.65175	0.0995862	0.161797	-5.12258
ARRDC2	-0.521895	-0.197549	-1.64837	0.100278	0.162425	-5.12799
SLC25A36	0.611605	0.185918	1.64631	0.100701	0.162425	-5.13128
ZGPAT	0.711455	-0.135979	1.64625	0.100713	0.162425	-5.13137
LIME1	0.686841	-0.181964	1.64269	0.10145	0.163212	-5.13706
TERF2IP	-0.729614	0.497219	-1.63643	0.102752	0.164904	-5.14701
RAB29	0.763923	0.387511	1.63408	0.103246	0.165294	-5.15074
RHOU	-0.227468	0.0271902	-1.62219	0.105768	0.16892	-5.16953
BTG3	0.566151	-0.443392	1.61443	0.10744	0.171176	-5.18172
RPL19	-0.230752	0.0736872	-1.6117	0.108033	0.171704	-5.18598
SOCS1	0.533729	0.312411	1.59981	0.110648	0.175438	-5.20452
HSPA1L	0.538491	-0.463475	1.59147	0.112512	0.177466	-5.21744
TNFRSF1B	0.80086	-0.80795	1.59102	0.112612	0.177466	-5.21813
GLIPR1	-0.765026	0.285523	-1.59047	0.112737	0.177466	-5.21898
CRTC2	0.555743	0.0143423	1.58377	0.114253	0.179423	-5.22929
MMD	0.558702	0.543372	1.57493	0.11628	0.182173	-5.24285
TTC39C	-0.70264	1.16034	-1.55074	0.121972	0.190635	-5.27955
HLA-G	0.122288	0.00246541	1.52913	0.127239	0.198396	-5.31187
ANKRD44	0.617834	0.213173	1.52717	0.127726	0.198684	-5.31478
DNAJC11	-0.484745	-0.118335	-1.51299	0.131288	0.203744	-5.33572
NDFIP1	0.61396	-0.425219	1.51038	0.131952	0.204293	-5.33955
WDR86-AS1	0.436666	0.474526	1.50915	0.132268	0.204301	-5.34137
HSPA1B	0.534635	0.0923558	1.47466	0.141308	0.217753	-5.39136
POTEE	0.16595	0.00684992	1.47307	0.141734	0.217899	-5.39363
GNLY	0.547019	-0.231208	1.46442	0.144082	0.220992	-5.40599
CCL3L1	-0.374557	0.685679	-1.45239	0.147393	0.225546	-5.42304
PIM1	0.680468	0.874503	1.44486	0.149496	0.228233	-5.43364
CD3D	0.215272	-0.0243815	1.44332	0.14993	0.228365	-5.43581
PDE3B	0.578867	-0.176365	1.42619	0.154809	0.235253	-5.4597
PPP2CA	0.717023	0.0295042	1.42171	0.156104	0.236674	-5.4659
EGR1	-0.393529	0.343396	-1.41562	0.15788	0.238328	-5.4743
NR1D1	-0.598569	1.2285	-1.41548	0.157919	0.238328	-5.47449
CD96	-0.518525	1.27683	-1.40415	0.161262	0.242816	-5.49002
PYCARD-AS1	0.350855	-0.365057	1.39036	0.165405	0.248485	-5.50876
SUSD6	0.638569	0.0412753	1.38276	0.167722	0.251392	-5.51901
MIR486-1	-0.0204097	-0.0158486	-1.38086	0.168304	0.251691	-5.52156
ATAD2B	0.561705	-0.0998167	1.373	0.170733	0.254745	-5.53209
FOS	0.650862	0.731694	1.36377	0.173616	0.257912	-5.54437
HSPA1A	0.563995	-0.488967	1.3637	0.17364	0.257912	-5.54447
NTRK1	0.25912	0.0319149	1.34208	0.180542	0.26756	-5.57293
ACTG1	0.241262	0.245829	1.31209	0.190449	0.281313	-5.61166
TRIM2	-0.0190659	-0.0640437	-1.31141	0.190677	0.281313	-5.61252
CMTM3	-0.544916	0.190573	-1.29939	0.194763	0.286699	-5.62779
MIR134	-0.0784083	-0.0786638	-1.29676	0.195666	0.287384	-5.63112
LCP2	0.405393	0.0626691	1.28835	0.198574	0.291006	-5.6417
BCAS4	-0.320974	-0.188755	-1.27568	0.203013	0.29685	-5.65752
MIR497HG	0.491447	-0.576582	1.2684	0.205595	0.299959	-5.66653
FLNA	-0.561457	0.136257	-1.26652	0.206267	0.300273	-5.66885
TMSB4X	-0.133737	-0.114218	-1.2627	0.207636	0.3016	-5.67356
ACTB	0.121797	0.124883	1.25956	0.208764	0.302218	-5.67741
LYPLA1	0.553342	0.0600047	1.25896	0.20898	0.302218	-5.67814
P4HB	-0.600404	1.06004	-1.25604	0.210036	0.303079	-5.68172
PHOSPHO2	0.257582	0.0166795	1.25129	0.211763	0.304901	-5.68752
CMC2	0.422736	-0.278003	1.24908	0.212566	0.30539	-5.6902
COX7B	-0.366174	0.0549251	-1.22666	0.22087	0.316628	-5.71723
PPP1R18	0.461221	0.365534	1.21391	0.225695	0.322842	-5.73239
C22orf29	0.322504	-0.0371512	1.20391	0.229532	0.327618	-5.74416
RPS3A	-0.221883	0.0442063	-1.20119	0.230584	0.32833	-5.74735
TLE1	-0.496878	1.639	-1.20004	0.231029	0.32833	-5.74869
PLAC8	-0.531089	1.90052	-1.18629	0.236404	0.335245	-5.76467
TXNIP	-0.267721	0.289309	-1.18362	0.237459	0.336017	-5.76776
MORF4L2-AS1	0.227502	0.069883	1.17452	0.241079	0.340407	-5.77822
PVRIG	-0.501641	1.27904	-1.15848	0.247549	0.348795	-5.79644
PER1	-0.402907	0.68584	-1.1555	0.248765	0.34976	-5.7998
FAM50A	-0.477577	0.313428	-1.15083	0.250681	0.351701	-5.80506
RPS4X	0.208564	0.169128	1.14549	0.252881	0.354033	-5.81103
SYNE1	0.548778	0.487102	1.1319	0.258539	0.36044	-5.8261
SDF4	0.506732	-0.316747	1.13187	0.258553	0.36044	-5.82614
FOSB	0.445167	0.793516	1.11285	0.266627	0.36979	-5.84695
CD9	-0.378972	0.750434	-1.1126	0.266732	0.36979	-5.84722
ZAP70	0.422936	0.564596	1.1121	0.266946	0.36979	-5.84776
TMEM63A	0.48295	-0.544754	1.09918	0.272534	0.376038	-5.86169
ANKRD28	0.432203	0.274987	1.09903	0.272599	0.376038	-5.86185
FNBP1	-0.453891	0.29314	-1.09556	0.274112	0.377334	-5.86556
PSMD8	-0.508985	-0.0678757	-1.08822	0.277332	0.38097	-5.87337
FAM107B	0.532619	-0.300487	1.07965	0.281127	0.385378	-5.88243
MAPKAPK3	0.469865	-0.104241	1.0645	0.287921	0.393871	-5.89827
USP36	-0.445409	0.311646	-1.05445	0.292489	0.39929	-5.90865
CREM	0.447822	-0.396718	1.05091	0.294108	0.400669	-5.91228
RASA3	0.377178	-1.15202	1.04687	0.295963	0.402135	-5.91641
THTPA	0.331285	-0.0783896	1.04591	0.296407	0.402135	-5.91739
BRWD1	0.5187	0.32087	1.04032	0.298994	0.404811	-5.92309
NCBP2-AS2	-0.386692	0.242456	-1.02576	0.305796	0.413169	-5.93775
PLEK	0.50761	1.60686	1.0229	0.307145	0.414142	-5.94061
FAAH2	-0.145933	-0.434029	-1.00838	0.314047	0.422583	-5.95499
MYADM	-0.406994	0.530906	-1.00296	0.316654	0.425221	-5.96031
TPST2	0.444459	-0.0611184	1.00095	0.317624	0.425655	-5.96228
ZRSR2	-0.278694	-0.0672945	-0.9854	0.325187	0.434904	-5.97734
LYSMD2	0.444735	0.833991	0.982112	0.326802	0.436177	-5.9805
MED13L	0.310211	0.111675	0.97147	0.332063	0.441855	-5.99064
SNORD31	-0.163443	0.039987	-0.970794	0.332399	0.441855	-5.99128
ATP5D	0.354452	-0.201652	0.958602	0.338497	0.449055	-6.00276
NOS3	0.0958238	-0.274946	0.956923	0.339343	0.449271	-6.00433
NSG1	-0.310602	0.245203	-0.949031	0.343336	0.453644	-6.01167
PVALB	-0.0135328	-0.0495522	-0.939587	0.348152	0.459087	-6.02037
ATP6V1G2-DDX39B	-0.401584	-0.553195	-0.93522	0.350394	0.461119	-6.02436
MTUS1	0.156042	-0.0105077	0.932366	0.351865	0.461442	-6.02697
LAG3	0.40984	1.36123	0.932021	0.352042	0.461442	-6.02728
MTRNR2L10	-0.0787834	0.0346815	-0.929038	0.353583	0.462541	-6.02999
PLEKHG3	0.309355	0.270692	0.923156	0.356635	0.465607	-6.0353
PTPN14	-0.0325858	-0.0392572	-0.896586	0.370627	0.482916	-6.0589
RPL3	-0.0866522	0.292173	-0.886622	0.375962	0.487951	-6.06757
IL4I1	-0.370081	0.900301	-0.885418	0.376609	0.487951	-6.06862
PXN	0.415579	-0.304753	0.88522	0.376716	0.487951	-6.06879
ATP5EP2	-0.10214	-0.101119	-0.878253	0.380478	0.491856	-6.07478
C1orf56	-0.245928	0.0877915	-0.874416	0.382561	0.493578	-6.07807
TANK	-0.424054	0.188712	-0.87083	0.384513	0.495126	-6.08112
COL5A3	0.0717181	0.0584511	0.858024	0.391534	0.50262	-6.09193
PCBP1	-0.272902	-0.130212	-0.857432	0.391861	0.50262	-6.09242
MIR3661	0.293194	0.0352347	0.847106	0.397582	0.508966	-6.10102
CDKL3	0.343134	0.0774798	0.843998	0.399314	0.510191	-6.10358
TMEM71	-0.405977	1.67379	-0.841309	0.400816	0.511118	-6.1058
NEDD9	0.402444	0.509245	0.831536	0.406304	0.517114	-6.11378
PTGER4	0.404356	0.409177	0.827712	0.408463	0.518858	-6.11688
ITM2B	-0.222722	0.323563	-0.821842	0.411791	0.522078	-6.1216
CSNK1A1	0.391511	0.189352	0.816969	0.414566	0.524585	-6.1255
MIR5047	-0.277885	-0.669471	-0.8118	0.417522	0.527312	-6.12961
CCL22	-0.0116949	-0.0557769	-0.799033	0.424876	0.534827	-6.13966
TMEM41B	0.309794	0.157691	0.798649	0.425098	0.534827	-6.13996
MYC	-0.325896	-0.0117759	-0.782532	0.434492	0.545603	-6.1524
RHOC	-0.374262	0.942363	-0.775519	0.438617	0.549322	-6.15774
ELOVL4	-0.186683	0.30314	-0.77466	0.439124	0.549322	-6.15839
RPS18	-0.103612	0.206778	-0.748657	0.454625	0.567634	-6.17774
RPP40	0.111211	-0.0407449	0.744042	0.457408	0.570027	-6.1811
PAN3	0.347796	0.287229	0.738786	0.46059	0.572907	-6.18491
PDE7A	-0.334675	0.760415	-0.73642	0.462025	0.573609	-6.18661
PAIP2B	0.105993	0.0472344	0.732886	0.464175	0.575193	-6.18915
PSMA3	-0.304136	-0.14943	-0.730445	0.465663	0.575952	-6.19089
CENPN	0.203056	-0.0607326	0.718539	0.47296	0.583879	-6.19932
ATF7IP	-0.311909	0.489729	-0.712743	0.476534	0.58719	-6.20337
GPR183	-0.341368	-0.972813	-0.706215	0.480579	0.591067	-6.2079
CACNA1C-AS1	-0.102787	0.0780774	-0.700915	0.483875	0.594011	-6.21154
PTPN7	0.327722	0.452932	0.673405	0.501186	0.614116	-6.23002
ID2	0.258745	2.12013	0.671862	0.502166	0.614173	-6.23103
STK17B	-0.177973	-0.285287	-0.664808	0.506662	0.618522	-6.23564
HIST1H3E	0.0425236	0.0041639	0.660587	0.509362	0.620667	-6.23837
KCNAB1	-0.115934	0.0966688	-0.646932	0.518149	0.630207	-6.2471
ITK	0.306665	-0.948262	0.639853	0.522735	0.634324	-6.25155
ZKSCAN7	-0.0840758	-0.0169137	-0.638734	0.523462	0.634324	-6.25225
SLC16A4	0.064708	-0.0760155	0.634434	0.52626	0.636542	-6.25492
UBE2J1	0.257498	0.0970106	0.618592	0.536634	0.6479	-6.26463
EIF5AL1	0.0547262	-0.0291279	0.615914	0.538398	0.648561	-6.26624
LOC100130476	0.215817	-0.00766708	0.614768	0.539154	0.648561	-6.26693
DUSP2	0.313242	1.55313	0.612905	0.540383	0.648854	-6.26805
TNFSF14	-0.285335	2.10454	-0.591536	0.554587	0.664696	-6.28063
WIPF1	-0.200854	0.222497	-0.567202	0.570983	0.683103	-6.29441
APOBEC2	0.0649501	-0.0555352	0.563846	0.573262	0.684585	-6.29627
SEC62	-0.225838	0.398058	-0.560592	0.575476	0.685466	-6.29806
MYL6	0.099514	-0.119352	0.5597	0.576083	0.685466	-6.29854
DNAJC1	-0.236201	0.744666	-0.555625	0.578863	0.687308	-6.30077
MIR3188	-0.0989541	0.267451	-0.55437	0.579721	0.687308	-6.30145
RIPOR2	0.252682	-0.476192	0.54587	0.585543	0.692963	-6.30602
CCR7	0.112696	-1.7034	0.539994	0.589584	0.696493	-6.30914
NKX3-1	0.0330534	0.0294907	0.533749	0.593893	0.700326	-6.31242
RPS10	0.0926965	0.13497	0.525467	0.59963	0.704292	-6.31671
HNRNPDL	0.219859	0.0484337	0.525137	0.599859	0.704292	-6.31687
CBFB	0.202095	-0.694214	0.52426	0.600468	0.704292	-6.31732
ARPC5L	0.228722	0.422212	0.515108	0.60684	0.7105	-6.32198
PXN-AS1	0.160109	-0.0491463	0.505194	0.613777	0.717345	-6.32692
RPL29	-0.127682	-0.0752137	-0.503378	0.615052	0.717561	-6.32782
PDE4D	-0.222506	1.22137	-0.494281	0.621454	0.723746	-6.33225
SRGN	-0.144636	0.380081	-0.491667	0.623298	0.723995	-6.33351
LOC100129917	0.136874	0.0631021	0.490861	0.623868	0.723995	-6.3339
ZFP36	-0.221202	0.215431	-0.485667	0.627542	0.726976	-6.33638
DDX39B	-0.225717	-0.554987	-0.482878	0.629519	0.727986	-6.3377
DUSP1	-0.2407	2.15245	-0.471923	0.63731	0.735	-6.34282
CFAP44-AS1	-0.0380335	-0.00978496	-0.471209	0.637819	0.735	-6.34315
JUND	-0.127705	0.180482	-0.467996	0.640112	0.736353	-6.34462
CCL4L1	0.143261	1.03625	0.464728	0.642449	0.737022	-6.34611
BTG2	0.246296	0.297659	0.464049	0.642934	0.737022	-6.34642
LOC644936	0.040756	0.0321468	0.461203	0.644972	0.738073	-6.34771
PTBP1	-0.220948	-0.266194	-0.45688	0.648074	0.740334	-6.34965
CXCR6	0.22682	2.83896	0.453714	0.650349	0.741186	-6.35106
CCDC157	0.100576	-0.0918501	0.452708	0.651072	0.741186	-6.35151
MIR3064	-0.0965308	-0.366465	-0.446022	0.655889	0.74538	-6.35444
SURF4	0.22218	0.48169	0.443262	0.657882	0.746356	-6.35564
ZNF766	0.165765	0.193016	0.437623	0.661961	0.74969	-6.35807
CD69	0.183783	3.07041	0.434628	0.664131	0.750857	-6.35935
FABP5	0.0575638	-0.0199187	0.426286	0.670192	0.756361	-6.36286
KLRF1	-0.113199	0.36389	-0.424765	0.671299	0.756361	-6.3635
USP4	0.206015	0.00664743	0.421151	0.673933	0.758031	-6.36499
HIST1H1D	0.106533	-0.307129	0.414553	0.678752	0.762149	-6.36769
OXNAD1	-0.184409	0.229083	-0.409026	0.682799	0.765387	-6.36991
GSTP1	0.16671	0.139722	0.399749	0.689613	0.770671	-6.37358
GRAMD1A	0.165299	0.428038	0.399131	0.690068	0.770671	-6.37383
MDFIC	0.180401	0.16222	0.397829	0.691027	0.770671	-6.37433
QRICH1	0.185394	0.181979	0.387939	0.698325	0.777492	-6.37813
HIST1H3F	-0.0228604	0.0237402	-0.376637	0.706698	0.785486	-6.38236
JUN	-0.176542	0.943091	-0.36749	0.713501	0.79171	-6.38569
PHLPP2	-0.0664935	0.0584457	-0.362261	0.717401	0.794233	-6.38756
COX8A	-0.1152	-0.344967	-0.361204	0.71819	0.794233	-6.38793
PDGFA	-0.00807202	-0.168153	-0.359061	0.719791	0.794669	-6.38869
SRSF3	0.152677	0.0796604	0.353479	0.723967	0.79794	-6.39063
MXD3	-0.132483	0.237298	-0.337143	0.736235	0.810104	-6.39615
RPL13A	-0.0629555	-0.145571	-0.335479	0.737488	0.810129	-6.3967
INSL3	-0.0241992	-0.0483772	-0.332397	0.739811	0.811289	-6.39771
NT5E	0.0312668	-0.071373	0.330809	0.74101	0.811289	-6.39822
GNAS	-0.137076	-0.0166131	-0.320755	0.74861	0.818248	-6.40142
CAPG	0.115275	-0.167636	0.317652	0.75096	0.819456	-6.40239
CPNE2	-0.0734559	0.100248	-0.31475	0.753161	0.820496	-6.40329
CDC42SE2	-0.102348	0.159921	-0.295282	0.767974	0.835251	-6.4091
MSX2P1	0.0467698	-0.0388588	0.281607	0.778431	0.845227	-6.41296
REL	-0.116326	0.373655	-0.27912	0.780337	0.8459	-6.41364
MSANTD2	0.0398684	-0.0236592	0.269425	0.78778	0.852564	-6.41625
STK38	0.117705	-0.887115	0.254732	0.799097	0.863392	-6.42001
NFKBIA	-0.137859	0.776531	-0.250718	0.802197	0.86532	-6.42101
PRKCH	-0.0990913	0.753248	-0.242377	0.808646	0.87085	-6.42302
LGR6	0.0426085	-0.140527	0.239445	0.810917	0.871868	-6.42371
SLC2A14	0.0326459	0.136011	0.233178	0.815776	0.875661	-6.42516
ITGA6	-0.0772531	0.0517783	-0.221461	0.824877	0.883989	-6.42776
CLIC1	0.0741217	0.320548	0.216084	0.829063	0.885992	-6.42892
FASLG	-0.106142	1.22373	-0.215601	0.829439	0.885992	-6.42902
SLA	-0.0958217	0.359693	-0.205577	0.837254	0.89289	-6.43108
YWHAH	-0.0901483	0.831814	-0.19979	0.841774	0.896258	-6.43223
YBX1	-0.0579878	-0.315873	-0.188116	0.850907	0.904519	-6.43445
L3MBTL3	-0.0469293	-0.284023	-0.185753	0.852758	0.905024	-6.43488
TMEM2	-0.0776544	-0.144047	-0.178887	0.858142	0.909271	-6.4361
HIST2H2AC	0.0308192	0.048412	0.175743	0.860609	0.909378	-6.43665
AGTPBP1	-0.0629344	-0.101269	-0.173669	0.862238	0.909378	-6.437
TPRG1-AS2	-0.0107973	-0.0339671	-0.173476	0.862389	0.909378	-6.43704
RNASEK-C17orf49	0.0560431	-0.214554	0.166192	0.868113	0.913756	-6.43825
HMGN1	-0.0671621	0.0595617	-0.164659	0.869318	0.913756	-6.4385
RPS10-NUDT3	-0.0308354	0.191512	-0.157357	0.875065	0.917164	-6.43965
ZFP36L2	-0.0615539	0.52252	-0.156998	0.875348	0.917164	-6.4397
NUP153	-0.0639302	0.0498813	-0.153376	0.8782	0.917673	-6.44025
C1orf162	0.0205958	-0.644313	0.15284	0.878623	0.917673	-6.44033
SNORD4A	0.0120026	0.0140815	0.146501	0.88362	0.92143	-6.44126
TTC16	-0.0398863	-0.042431	-0.143011	0.886374	0.922072	-6.44176
KLF2	0.0401191	-0.83055	0.14168	0.887424	0.922072	-6.44194
JUNB	-0.0618084	1.12939	-0.140393	0.88844	0.922072	-6.44212
SPATA6	-0.00661076	0.00226286	-0.124538	0.900969	0.933603	-6.44417
PRELID1	0.0524093	0.25584	0.121404	0.903449	0.934422	-6.44455
LARGE2	-0.00868543	-0.010684	-0.11995	0.9046	0.934422	-6.44472
LEXM	-0.0048353	-0.0466246	-0.117298	0.906699	0.935122	-6.44503
SELL	-0.0201588	-3.27849	-0.112974	0.910124	0.937185	-6.44552
S1PR4	0.0448961	-0.546145	0.106014	0.915639	0.93909	-6.44626
IER2	-0.0523731	0.534163	-0.105176	0.916303	0.93909	-6.44635
HNRNPA2B1	-0.0376411	0.0788326	-0.104755	0.916637	0.93909	-6.44639
TLK1	-0.0492808	-0.70835	-0.103437	0.917682	0.93909	-6.44653
ATXN2L	-0.0378298	0.0757505	-0.0950865	0.924307	0.944289	-6.44734
CRADD	0.0231954	-0.24008	0.0925863	0.926291	0.944289	-6.44757
NEDD8	0.0348247	0.311291	0.0916077	0.927068	0.944289	-6.44766
FTH1	-0.0127661	-0.241306	-0.0793275	0.936823	0.95275	-6.44868
CD6	-0.0315539	0.579629	-0.0700498	0.944199	0.95877	-6.44936
CBX5	0.0221996	-0.130211	0.0517868	0.958732	0.970576	-6.45045
RPL22	0.0151229	0.198628	0.0517311	0.958776	0.970576	-6.45045
RASAL3	0.0174915	0.504086	0.039867	0.968225	0.978636	-6.45099
BTG1	0.00944074	0.162833	0.0281261	0.977579	0.986496	-6.45138
VCL	-0.0088321	0.000887829	-0.0263443	0.978999	0.986496	-6.45142
PI16	0.000436138	-0.322618	0.0226128	0.981974	0.987979	-6.45151
SH2D2A	0.0054719	1.00341	0.0141145	0.988748	0.993276	-6.45167
LYAR	-0.00346538	1.28869	-0.00800917	0.993615	0.996644	-6.45173
CCL4	-0.00254447	2.03909	-0.0055211	0.995598	0.997114	-6.45175
IVNS1ABP	-0.000569708	0.357557	-0.00106587	0.99915	0.99915	-6.45176
Supplementary Table 2. Differentially expressed genes between normal and tumor tissue MAIT cells. The limma-trend F-statistic was first used to prioritize genes exhibiting signals of differential expression between MAIT cells from the blood, normal and tumor tissues of cancer patients (Benjamini-Hochberg-adjusted p<0.2). Gene expression in tumor versus normal tissue MAIT cells was then compared p…

## Sheet: Supplementary Table 3
Gene	CD4 Exp	CD8 Exp	Treg Exp	MAIT Exp	F	P.Value	adj.P.Val
NSCLC_Tumor
TARP	-4.85812	-1.12081	-5.83984	-0.150949	707.14	0	0
SLC4A10	-3.82968	-4.09138	-4.17199	0.0285675	253.993	6.93135e-152	2.14872e-150
CA2	-2.0198	-2.07441	-2.07991	0.0229036	224.641	1.70055e-135	3.51447e-134
KLRB1	-3.312	-5.08531	-5.78633	0.187533	190.258	6.23936e-116	9.67101e-115
SYTL2	-2.43404	-1.37567	-4.12502	0.186233	181.688	5.42837e-111	6.73118e-110
KLRG1	-2.64665	-1.16119	-3.45422	-0.668702	144.012	5.70747e-89	5.89772e-88
JAML	-3.19233	-1.47954	-4.07935	0.811965	117.433	3.9733e-73	3.5192e-72
A2M	-2.12594	-1.18811	-2.77411	-0.551958	104.452	2.69669e-65	2.08993e-64
ABCB1	-2.09324	-1.35403	-2.79157	0.216525	98.5353	1.05052e-61	7.23689e-61
TMIGD2	-2.99356	-3.17494	-3.80922	0.053149	90.8536	5.04014e-57	3.12489e-56
ME1	-1.00039	-1.00104	-1.03386	-0.00458417	86.5002	2.31737e-54	1.30615e-53
BLK	-1.36906	-1.3512	-1.40117	0.0193131	85.718	6.98474e-54	3.60878e-53
NCR3	-3.35452	-3.03052	-2.437	0.0682052	85.3655	1.14862e-53	5.47803e-53
LST1	-2.09435	-2.15145	-1.32965	0.0905209	85.2664	1.32101e-53	5.85019e-53
ERN1	-1.36968	-1.92489	-2.91486	0.0254362	85.1237	1.61571e-53	6.67829e-53
RORC	-1.73294	-2.31597	-2.22483	0.106625	73.3602	2.78115e-46	1.0777e-45
RORA	-1.28257	-2.88578	-1.36648	-0.148017	71.9867	1.96076e-45	7.15102e-45
CTSH	-0.928944	-1.96334	-2.22345	0.25838	70.3681	1.96258e-44	6.75999e-44
DPP4	-1.46348	-2.3984	-2.95161	0.00146194	67.2655	1.63373e-42	5.33114e-42
ZBTB16	-2.10806	-2.65615	-2.58443	-0.0250199	65.4643	2.13606e-41	6.62177e-41
IL4I1	-1.99181	-2.86178	-2.00439	0.268219	57.4911	1.93066e-36	5.70004e-36
COLQ	-1.67063	-1.86437	-1.70058	-0.0505959	55.2509	4.81119e-35	1.35588e-34
CCL20	-1.07673	-1.83255	-0.824763	0.408032	52.8015	1.62629e-33	4.38392e-33
IL23R	-1.77802	-2.04529	-1.59713	0.108241	50.0642	8.36146e-32	2.16004e-31
GPR65	-1.72779	-1.67176	-2.92265	-0.0890145	45.9844	3.00091e-29	7.44226e-29
NRIP1	-1.05032	-1.14392	-0.59703	0.0556172	40.9728	4.19773e-26	1.001e-25
TLE1	-1.126	-1.0687	-1.22403	0.02652	37.7816	4.26622e-24	9.7965e-24
STAT4	-1.88578	-1.32012	-2.6181	0.242011	35.2993	1.56044e-22	3.45526e-22
SATB1	-1.1386	-1.92604	-1.13878	-0.438917	31.6051	3.33083e-20	7.12109e-20
BBIP1	-1.11258	-1.17021	-2.15216	0.154183	31.4311	4.28919e-20	8.86432e-20
CEBPD	-1.16033	-1.0316	-1.32265	0.0555918	31.3944	4.5236e-20	9.0472e-20
FSD1	-0.965364	-0.821608	-1.13089	0.0831947	30.3325	2.11694e-19	4.10158e-19
TSPAN15	-0.786568	-0.918672	-0.851274	-0.044021	29.9882	3.4917e-19	6.56016e-19
PLD1	-0.728749	-0.746994	-0.777539	-0.00135668	29.0049	1.45849e-18	2.65959e-18
PLXND1	-1.02593	-1.10236	-1.28714	-0.0237197	24.0298	2.0302e-15	3.59636e-15
RARG	-0.642156	-0.962332	-0.732898	-0.0326527	20.3259	4.46014e-13	7.68135e-13
MAP2K6	-0.783154	-0.745557	-1.12874	-0.000641292	19.1362	2.52016e-12	4.22296e-12
IFNGR1	-1.66461	-1.97191	-2.43874	0.11112	18.3324	8.11972e-12	1.3248e-11
KIF5C	-0.703191	-0.81527	-1.0505	0.085538	18.1917	9.9639e-12	1.58401e-11
SPTBN5	-0.895605	-0.719656	-0.982225	-0.0259767	15.6864	3.81128e-10	5.90748e-10
THRA	-0.601065	-0.830883	-0.719253	-0.133197	14.8523	1.28076e-09	1.93676e-09
CD48	-1.9156	-1.38533	-2.03464	-0.0733353	13.1422	1.53384e-08	2.26425e-08
GALNT10	-1.34204	-1.59448	-1.30807	0.145331	12.7772	2.60395e-08	3.75453e-08
C10orf128	-0.922341	-0.969356	-0.619813	0.0144141	12.6605	3.084e-08	4.34564e-08
ABHD15	-0.840542	-0.650118	-0.941384	0.0723768	12.553	3.60448e-08	4.96617e-08
SNHG16	-1.12192	-1.39916	-1.44229	-0.171085	11.7419	1.16726e-07	1.57327e-07
EEF1AKMT3	-0.593142	-0.701464	-0.615334	0.00596192	11.6494	1.33463e-07	1.76057e-07
OSTF1	-1.92471	-1.59115	-2.12217	0.35878	11.3879	1.94853e-07	2.51685e-07
ODF2L	-1.20612	-1.67099	-1.16055	-0.0354167	11.3435	2.07775e-07	2.62899e-07
DUSP1	-1.57685	-2.13233	-1.70192	0.655045	11.0462	3.19448e-07	3.96116e-07
CRACR2A	-1.0501	-0.92675	-1.27162	0.108781	9.80689	1.91352e-06	2.32624e-06
HELZ	-1.46044	-1.41246	-1.94202	0.143382	9.67073	2.32872e-06	2.77656e-06
MIR3652	-1.32136	-0.955249	-1.10272	0.0811891	9.6164	2.51848e-06	2.94614e-06
PEAK1	-0.609074	-0.603077	-0.662042	0.0272667	7.33163	6.70696e-05	7.70059e-05
TBC1D31	-1.04462	-0.918859	-1.00878	0.110306	6.59843	0.000191002	0.000215311
DNAAF2	-0.964867	-0.909616	-0.696324	0.0653803	6.5491	0.000204904	0.000226858
SPRYD4	-0.648909	-0.673342	-0.619695	0.00928437	5.57973	0.000811121	0.000882272
MIGA2	-0.813589	-0.87937	-0.781525	-0.031411	4.83751	0.00230863	0.00246785
PLP2	-1.42264	-1.53193	-1.2668	0.573749	4.56315	0.00339132	0.00356376
ZSWIM7	-0.795791	-0.826852	-0.836751	-0.0307961	3.82302	0.00950229	0.00981903
FAM160B2	-0.829298	-0.829683	-0.792765	-0.00729373	3.73701	0.0107025	0.010878
APBB3	-0.786917	-0.796142	-0.82837	-0.0538298	3.44755	0.0159482	0.0159482
NSCLC_Normal
SLC4A10	-5.59066	-5.97682	-5.99074	0.0209295	106.874	8.22005e-62	6.98704e-60
SLC7A8	-1.32551	-1.35434	-1.34373	-0.0355833	46.9664	8.25701e-29	3.50923e-27
FLT4	-1.54513	-1.52106	-1.4484	-0.0131285	33.5739	6.76953e-21	1.91803e-19
B3GALT2	-2.33928	-2.48969	-2.39247	-0.0522537	29.888	1.10673e-18	2.3518e-17
COLQ	-3.78102	-3.83267	-4.0765	0.0753064	29.5398	1.79421e-18	3.05015e-17
KLRB1	-5.57778	-6.50645	-7.26435	0.14124	25.3466	6.18731e-16	8.76535e-15
BLK	-1.01435	-1.00423	-1.02502	-0.0219119	25.2077	7.51385e-16	9.12396e-15
ADAM12	-1.87534	-2.09983	-1.46509	-0.134182	24.0712	3.68944e-15	3.92003e-14
DKK3	-1.75515	-1.61527	-1.82325	-0.0522933	21.13	2.29842e-13	2.17073e-12
ME1	-1.1744	-1.22831	-1.23199	0.00671038	20.5793	4.99259e-13	4.24371e-12
RORC	-1.72145	-2.05167	-2.04345	-0.113693	20.3763	6.64622e-13	5.13572e-12
IL23R	-1.85989	-2.03542	-1.79256	-0.0420495	19.8534	1.38926e-12	9.84058e-12
TPBG	-1.08164	-1.15816	-1.17931	-0.00708543	19.1874	3.55631e-12	2.32528e-11
TMIGD2	-2.00407	-2.37535	-2.31787	-0.140786	18.1966	1.44193e-11	8.75454e-11
SYTL2	-3.82774	-3.5535	-6.02335	0.56195	17.3588	4.71647e-11	2.67266e-10
PLD1	-1.39421	-1.37152	-1.37712	-0.00234668	16.811	1.02441e-10	5.4422e-10
LST1	-2.56084	-2.63648	-2.40893	-0.0737934	15.1415	1.09182e-09	5.45912e-09
TLE1	-1.59712	-1.56399	-1.67008	0.00264842	14.1497	4.46048e-09	2.10634e-08
NCR3	-3.18358	-2.79433	-2.38524	0.030357	13.712	8.30427e-09	3.71507e-08
FAM86HP	-1.02634	-1.02029	-1.09957	-0.016927	13.2113	1.69092e-08	7.1864e-08
FBP1	-1.12576	-1.2154	-1.23406	-0.00528916	12.6408	3.80299e-08	1.53931e-07
ZBTB16	-1.90496	-2.45181	-2.46601	-0.120624	12.5348	4.42113e-08	1.70816e-07
C2orf15	-1.17612	-1.18544	-1.24439	0.00926748	11.9489	1.01642e-07	3.69707e-07
TNFSF13B	-1.38037	-1.52796	-1.30032	-0.373716	11.9301	1.04388e-07	3.69707e-07
FAM86C2P	-1.07824	-1.09752	-1.07029	0.0124226	11.4471	2.07364e-07	7.05038e-07
PATJ	-2.71844	-3.47525	-3.00719	-0.0630986	11.1871	3.00047e-07	9.80924e-07
FBXL22	-1.00691	-0.999002	-1.0577	-0.00094991	10.9636	4.12177e-07	1.29759e-06
ZNF208	-1.03784	-1.04298	-1.07208	-0.0876543	10.7263	5.77449e-07	1.75297e-06
CD55	-4.43907	-3.82227	-4.64936	0.248272	10.6658	6.29281e-07	1.84444e-06
FLT3LG	-2.18819	-2.74474	-2.65789	-0.43039	10.2306	1.1678e-06	3.30876e-06
IFT140	-1.01605	-1.04679	-0.891193	-0.0333408	9.44947	3.54047e-06	9.70774e-06
P2RY14	-1.00342	-1.06421	-0.937196	-0.0320223	9.28868	4.44805e-06	1.13002e-05
FKBP14	-1.29677	-1.4207	-1.13615	-0.0168822	9.28554	4.46789e-06	1.13002e-05
SPRED2	-1.02416	-1.19309	-1.01677	0.0267827	9.27736	4.52007e-06	1.13002e-05
FSBP	-1.00465	-1.14681	-1.19295	-0.00977218	9.18573	5.14773e-06	1.25016e-05
SCART1	-0.895234	-0.954022	-0.987739	-0.0132095	9.07626	6.01268e-06	1.41966e-05
KIF5C	-1.56615	-1.8057	-1.85054	0.0271834	8.93428	7.3543e-06	1.6895e-05
SNX21	-1.89099	-1.70412	-1.4218	-0.149982	8.75436	9.4922e-06	2.12325e-05
B3GLCT	-1.76459	-1.90944	-1.94386	0.0157011	8.33806	1.71259e-05	3.73258e-05
NOL6	-2.63064	-2.43556	-2.23894	0.0557286	8.11792	2.33933e-05	4.97107e-05
MEGF11	-0.95369	-1.01841	-1.08585	0.0361868	8.02231	2.67852e-05	5.55303e-05
MPND	-0.775057	-0.794229	-0.668843	0.0140237	7.97827	2.85089e-05	5.76965e-05
ZNF30	-1.16341	-1.12996	-1.04819	-0.0554966	7.87891	3.28146e-05	6.48662e-05
POLR2C	-3.06681	-3.02686	-2.59874	-0.0209055	7.84519	3.44188e-05	6.64908e-05
LY9	-3.79418	-3.64068	-4.64576	-0.0930487	7.63748	4.61788e-05	8.72267e-05
CLUHP3	-2.86807	-2.97623	-2.49351	-0.0319942	7.56266	5.13341e-05	9.48565e-05
RABL2A	-1.81272	-1.8467	-1.82878	-0.0105542	7.46514	5.89245e-05	0.000106566
CC2D2A	-1.30765	-1.24261	-1.40263	-0.0034558	7.30194	7.42133e-05	0.000131419
CXXC5	-0.957237	-0.901566	-1.00252	0.00842047	7.28341	7.61823e-05	0.000132153
NR1D1	-1.80137	-1.97634	-1.77093	-0.0203252	7.0788	0.000101714	0.000172914
ACP6	-1.47929	-1.71421	-1.39657	-0.0968818	7.05897	0.000104602	0.000174337
PELI2	-1.03464	-1.14959	-1.11879	0.00557966	7.0002	0.000113652	0.000185777
SLC35A3	-2.39393	-2.62432	-2.7057	0.0736162	6.84211	0.00014206	0.000227832
LMOD3	-1.04409	-1.06295	-0.90751	0.000948294	6.63765	0.000189541	0.000291603
MECR	-1.41552	-1.61109	-1.56711	-0.069339	6.62907	0.000191848	0.000291603
GMPR2	-3.77324	-3.74191	-3.36207	0.0857566	6.62808	0.000192115	0.000291603
ZNF599	-1.03729	-1.07184	-1.22222	-0.0953188	6.38755	0.000269608	0.000401703
NEO1	-0.993843	-1.02551	-1.1342	0.0248049	6.3758	0.000274103	0.000401703
IRF2BP1	-0.822769	-0.83903	-0.915805	-0.0153725	6.21332	0.000344531	0.000496358
KCTD18	-2.14916	-2.1724	-2.31387	0.0987666	6.04185	0.000438476	0.000621174
ZNF232	-1.60424	-1.47382	-1.31043	0.0310388	5.99188	0.000470376	0.000655442
ITPRIP	-2.37723	-2.23637	-2.25888	0.105337	5.84968	0.000574355	0.000787423
BET1	-2.04413	-2.29741	-2.13063	-0.0366787	5.72302	0.000686088	0.000925675
PRR7	-0.947324	-0.933339	-0.936174	-0.00300653	5.71035	0.00069839	0.00092755
ZNF367	-0.854851	-0.863273	-0.865599	-0.00915733	5.60829	0.000805851	0.0010538
ANKRD23	-1.38394	-1.2816	-1.34765	-0.113536	5.5292	0.000900302	0.00115948
CENPQ	-1.45208	-1.44426	-1.32306	0.071015	5.51765	0.000914992	0.00116081
METTL21A	-1.87087	-1.7983	-1.94527	0.0326968	5.17407	0.00147974	0.00184968
ASB16	-1.42941	-1.38289	-1.66072	-0.0217187	4.96708	0.00197552	0.00243361
EML5	-0.6488	-0.667202	-0.722214	-0.0334409	4.94709	0.00203136	0.00246665
ABHD16B	-0.678245	-0.659317	-0.624787	-0.0226578	4.78188	0.00255721	0.00306144
TPRKB	-2.23824	-2.24719	-2.28325	0.0427145	4.73638	0.0027244	0.00321631
SNORD54	-0.695342	-0.693374	-0.639135	-0.0134875	4.67701	0.00295897	0.00338077
CAMKK1	-0.770054	-0.82986	-0.762361	0.0265576	4.6729	0.00297593	0.00338077
MGC16275	-0.886139	-0.904931	-0.907059	0.0207185	4.67119	0.00298304	0.00338077
ASB16-AS1	-1.72273	-1.77266	-1.97947	-0.0644314	4.65084	0.00306864	0.00343203
GTF2F1	-2.06515	-2.12577	-2.31763	-0.0737875	4.59318	0.00332474	0.00367016
NOD1	-2.11431	-1.93681	-1.97206	0.0753566	4.54922	0.00353409	0.00385125
SPRY1	-0.920403	-0.892642	-0.956233	-0.0482945	4.50469	0.00375951	0.00404504
PRKAG2-AS1	-1.22394	-1.25708	-1.28888	-0.0468016	4.33192	0.00477741	0.005076
AKAP9	-3.38381	-3.54772	-3.33275	-0.183463	4.29374	0.00503685	0.00528558
NUDT17	-1.42151	-1.40318	-1.39118	0.06317	4.26384	0.00524967	0.00544173
WDR24	-1.27195	-1.21555	-1.1955	-0.0598795	3.9365	0.00825062	0.00844943
CCDC30	-1.09442	-1.10172	-1.0697	0.0134775	3.92184	0.00841893	0.00851916
GNL3L	-2.35123	-2.34064	-2.31096	-0.0376123	3.77432	0.0103138	0.0103138
NSCLC_Blood
SLC4A10	-5.86454	-6.00054	-6.03977	-0.0254467	384.238	1.86014e-204	1.45091e-202
KLRG1	-5.67169	-3.211	-7.74337	1.10044	158.042	1.25855e-93	4.90834e-92
A2M	-3.4255	-1.6949	-5.09562	0.773963	114.369	2.64196e-69	6.86911e-68
EOMES	-3.12308	-1.52413	-3.58968	0.0219888	98.1552	5.45762e-60	1.06424e-58
GZMK	-6.55743	-5.40329	-7.61794	-0.672267	92.3295	1.32824e-56	2.07206e-55
KLRB1	-5.9757	-6.80238	-7.195	-0.265668	90.0571	2.81764e-55	3.66293e-54
LAG3	-2.3344	-1.12784	-2.52314	-0.396452	87.4839	9.03462e-54	1.00671e-52
LTK	-1.6462	-1.7465	-1.72652	0.012986	82.2477	1.07975e-50	1.05276e-49
BLK	-1.40104	-1.39773	-1.40617	-0.0142001	77.5948	6.05887e-48	5.25102e-47
DUSP2	-3.2552	-1.60864	-3.44812	-0.816029	76.821	1.7415e-47	1.35837e-46
IL23R	-1.94303	-2.02929	-2.01899	-0.143584	76.3097	3.49989e-47	2.48174e-46
CXXC5	-1.73007	-1.68366	-1.59938	-0.00574734	76.1004	4.65809e-47	3.02776e-46
CCR6	-2.97465	-4.36109	-2.27184	-0.416383	71.0279	4.84803e-44	2.90882e-43
PZP	-2.96118	-1.82536	-4.25459	0.617932	69.6341	3.29229e-43	1.83428e-42
DPP4	-1.74244	-3.30458	-3.21585	-0.149073	68.1496	2.54049e-42	1.32105e-41
CXCR6	-5.30651	-4.96372	-4.78869	-2.24043	63.0834	2.78001e-39	1.35526e-38
NCR3	-4.01017	-3.38729	-3.52591	0.0565139	60.8244	6.37463e-38	2.92483e-37
TC2N	-1.79174	-2.4556	-4.6905	0.461861	58.206	2.42832e-36	1.05227e-35
LYAR	-3.67081	-2.22588	-4.07122	0.476557	57.3137	8.41475e-36	3.45448e-35
ZBTB16	-2.69422	-3.39688	-3.39109	0.000344482	56.1186	4.45332e-35	1.73679e-34
CCR1	-1.686	-1.5212	-1.70193	-0.337048	50.807	7.51567e-32	2.79153e-31
CEBPD	-1.73916	-1.82052	-1.71044	-0.0689551	48.9221	1.06036e-30	3.75947e-30
LINC00612	-2.47586	-1.66012	-3.37593	0.444387	45.6243	1.10127e-28	3.73472e-28
TYROBP	-1.43192	-1.1331	-1.44918	0.00653281	43.9929	1.10132e-27	3.57929e-27
JAML	-4.48364	-5.26246	-3.56089	-0.859218	43.2894	2.97623e-27	9.28583e-27
P2RY14	-1.11805	-1.18482	-1.07612	-0.0306077	38.3983	3.04446e-24	9.13339e-24
TMIGD2	-2.45754	-2.6745	-3.1815	0.000972332	36.8495	2.75151e-23	7.94882e-23
MYBL1	-2.154	-1.60545	-2.91124	0.295546	35.1615	3.04155e-22	8.47288e-22
IL18RAP	-2.52423	-2.70862	-3.00818	-0.276844	34.5462	7.3102e-22	1.96619e-21
PLD1	-1.0047	-0.986028	-0.986445	-0.0095457	31.0249	1.11465e-19	2.89809e-19
ABCB1	-2.30185	-2.05344	-2.66631	-0.187056	30.4855	2.41095e-19	6.06627e-19
LST1	-2.08719	-2.1967	-2.10638	-0.0212793	28.6131	3.51815e-18	8.57549e-18
COLQ	-1.65644	-1.78412	-1.76701	0.0187025	23.1746	8.64736e-15	2.04392e-14
JUN	-2.0603	-1.71303	-2.2686	-1.77214	22.0122	4.60423e-14	1.05627e-13
ERN1	-1.70729	-2.2694	-2.59917	-0.0549943	21.8904	5.4863e-14	1.22266e-13
NR4A2	-1.37422	-1.14888	-1.14565	-0.468937	20.6902	3.08768e-13	6.68997e-13
RORC	-0.974538	-1.32751	-0.977838	-0.0647658	20.5459	3.80106e-13	8.01304e-13
LOC643733	-2.83165	-2.63048	-2.39943	-0.354174	20.2207	6.07141e-13	1.22778e-12
ME1	-0.619471	-0.662846	-0.680568	0.00455757	20.2131	6.1389e-13	1.22778e-12
CCR5	-1.58746	-1.05201	-1.42284	-0.478404	19.98	8.5884e-13	1.67474e-12
DUSP1	-3.94317	-3.83099	-3.90078	-1.2411	19.8867	9.8233e-13	1.86882e-12
GPR171	-3.05445	-3.02624	-4.29722	-0.738024	19.8447	1.04355e-12	1.93801e-12
IFNGR1	-2.91365	-3.00591	-3.78538	-0.244672	19.4511	1.83986e-12	3.33741e-12
A2M-AS1	-1.43787	-1.06614	-1.89098	0.230203	19.4246	1.91161e-12	3.38877e-12
CTSH	-1.68692	-2.12451	-2.01404	-0.409892	19.1013	3.04546e-12	5.27879e-12
LPAR5	-1.64829	-1.36737	-1.53735	0.00216694	18.9823	3.61536e-12	6.1304e-12
IL18R1	-2.03382	-2.11215	-1.80548	-0.531259	18.0056	1.47726e-11	2.45163e-11
PLXND1	-1.41484	-1.39129	-1.68946	0.0100291	17.8299	1.90304e-11	3.09245e-11
TLE1	-0.798328	-0.762137	-0.822778	-0.0387246	17.1425	5.12611e-11	8.15994e-11
FOSB	-0.981739	-0.853904	-1.14372	-1.10177	16.6477	1.04612e-10	1.63194e-10
SPOCK2	-2.3474	-3.07155	-2.26245	-0.240357	16.2793	1.77934e-10	2.72134e-10
GTDC1	-1.47119	-1.05478	-1.6809	-0.220297	15.7594	3.76528e-10	5.64791e-10
SPON1	-0.933631	-0.927805	-1.10294	-0.023612	14.6913	1.75603e-09	2.58434e-09
CYTH3	-0.931809	-0.88109	-0.904111	-0.0441762	13.526	9.41569e-09	1.36004e-08
NR1D1	-1.61185	-1.78868	-1.53176	0.121837	13.0408	1.89422e-08	2.68635e-08
CCDC102A	-0.761686	-0.623306	-0.792185	0.0448883	11.8649	1.02982e-07	1.43439e-07
FOS	-1.24414	-1.22913	-1.79907	-1.69079	11.5221	1.68641e-07	2.30771e-07
GALC	-1.625	-1.29588	-1.85491	0.0455372	10.5672	6.65668e-07	8.95208e-07
HIST2H2BE	-0.887654	-0.868883	-1.01194	-0.209208	10.3272	9.39592e-07	1.24217e-06
CARD11	-1.51568	-1.71762	-2.06313	-0.00937861	9.00494	6.26204e-06	8.14066e-06
SLC7A5	-0.852465	-0.673879	-0.727358	-0.645919	8.81044	8.27331e-06	1.0579e-05
GALNT4	-0.944051	-1.07427	-0.981126	-0.0463208	7.81271	3.44452e-05	4.33343e-05
GALNT3	-1.0273	-0.877005	-1.06899	0.0137081	7.51983	5.23076e-05	6.44318e-05
ASPH	-0.807809	-0.969376	-0.968187	0.0922384	7.51237	5.28671e-05	6.44318e-05
SAMD4B	-0.991023	-0.958179	-1.12894	-0.0671828	7.4592	5.70293e-05	6.84352e-05
TMEM101	-1.11734	-1.35647	-1.10198	0.0392079	6.93045	0.000121065	0.000143077
THRA	-1.08422	-1.2003	-0.983127	0.199449	6.81516	0.000142623	0.000166039
POC1B-GALNT4	-1.30959	-1.3521	-1.31148	-0.155226	5.88446	0.000533439	0.000611886
PSTK	-0.674058	-0.64743	-0.645621	0.00772571	5.80401	0.000597646	0.000675599
ELL	-1.17776	-1.15756	-1.32996	-0.136598	5.68391	0.000708068	0.00078899
USP13	-0.738773	-0.742999	-0.78647	0.0333311	5.53763	0.000870311	0.000956116
GDPD1	-0.672184	-0.610252	-0.713252	0.0286742	5.41946	0.00102794	0.00111361
RBM27	-1.6947	-1.70897	-1.90169	-0.0392464	5.27399	0.00126147	0.00134787
DAB1	-0.954614	-1.06996	-1.03146	0.0223383	4.7884	0.00249324	0.00262801
RAPGEF2	-0.672947	-0.664501	-0.732902	-0.00165447	4.57672	0.0033518	0.00348588
HELZ	-1.77621	-1.95188	-1.89279	-0.0765439	4.56633	0.00340077	0.00349027
COQ2	-0.731562	-0.789918	-0.805789	-0.00419282	4.48213	0.00382476	0.00387443
CD2AP	-1.00604	-0.980531	-1.02006	-0.00454945	4.45007	0.00399958	0.00399958
CRC_Tumor
TARP	-5.03175	-1.73403	-6.66093	-0.210675	633.004	0	0
ABCB1	-3.86482	-2.03474	-4.6832	0.0156367	263.817	2.27057e-154	9.1958e-153
SYTL2	-3.39013	-3.01758	-6.09282	0.0748015	253.003	1.30843e-148	3.53275e-147
ME1	-3.17214	-3.16337	-3.20071	0.0161894	243.725	1.24256e-143	2.51618e-142
HOPX	-3.6534	-2.2254	-5.33728	-0.0728364	238.79	5.68391e-141	9.20794e-140
SLC4A10	-4.64993	-4.84797	-4.97341	-0.0381524	227.777	5.32388e-135	7.18724e-134
JAML	-3.52325	-2.306	-5.41404	0.0459527	164.57	8.42126e-100	9.7446e-99
KLRB1	-3.56596	-5.95799	-5.74556	-0.378354	146.271	2.65131e-89	2.68445e-88
PIK3AP1	-3.22714	-1.80433	-3.17555	0.184768	138.232	1.20527e-84	1.08474e-83
FKBP11	-2.52675	-2.63575	-4.3988	-0.426313	116.982	3.37415e-72	2.73306e-71
LST1	-2.2599	-2.3483	-1.2542	0.108494	112.716	1.12516e-69	8.28525e-69
BLK	-1.49957	-1.53727	-1.52125	-0.0328762	103.48	3.47464e-64	2.34538e-63
TLE1	-1.86394	-1.9254	-1.95464	-0.0170924	99.6757	6.51173e-62	4.05731e-61
NCR3	-5.46062	-5.16442	-4.62573	0.0795873	97.0277	2.50814e-60	1.45114e-59
ZBTB16	-3.10341	-3.42445	-3.22963	-0.133338	83.8799	2.08727e-52	1.12713e-51
IL23R	-2.71482	-3.19198	-2.06156	0.222909	75.5212	2.48748e-47	1.25929e-46
CTSH	-1.59842	-2.78039	-2.76967	0.137973	75.0255	4.98589e-47	2.37563e-46
TMIGD2	-3.24601	-3.42994	-4.02553	-0.366186	73.3968	4.9083e-46	2.20873e-45
A2M	-2.19593	-1.53743	-2.72417	-0.540873	70.5345	2.74956e-44	1.17218e-43
CAMK4	-2.0495	-2.23423	-3.69216	-0.582846	66.6994	6.13207e-42	2.48349e-41
COLQ	-2.59977	-2.72522	-2.63106	-0.0962161	63.5838	5.015e-40	1.93436e-39
TXK	-1.90102	-2.21619	-2.86594	-1.0413	55.7337	3.4568e-35	1.27273e-34
FSD1	-2.16561	-2.1028	-2.33112	0.0350448	51.2868	1.95689e-32	6.89165e-32
RORC	-1.57123	-1.93428	-1.87365	-0.0190667	48.0953	1.87329e-30	6.32235e-30
PZP	-1.54192	-1.17198	-1.84703	-0.38385	44.0138	6.49133e-28	2.10319e-27
LINC00612	-1.43763	-1.08083	-1.67892	-0.272234	42.1855	8.95882e-27	2.79102e-26
IL4I1	-1.99651	-2.84893	-1.95924	0.170375	40.4919	1.02174e-25	3.06521e-25
SATB1	-2.74171	-3.65539	-2.57425	-0.358037	36.5591	2.9405e-23	8.50645e-23
MYBL1	-1.69318	-1.78529	-2.08629	-0.287498	35.0284	2.6734e-22	7.46708e-22
DPP4	-2.25264	-3.13419	-2.88313	-0.255563	34.7779	3.83719e-22	1.03604e-21
GTDC1	-2.12995	-2.12072	-2.8924	0.225689	31.8081	2.79628e-20	7.30642e-20
TSPAN15	-0.920986	-0.966578	-0.96239	-0.0478651	31.1877	6.85552e-20	1.7353e-19
CD55	-2.303	-2.15577	-3.19735	-0.365803	31.0345	8.55475e-20	2.0998e-19
CA2	-1.11053	-1.18147	-1.21709	0.0277532	30.5347	1.7623e-19	4.19842e-19
P2RY14	-1.4939	-1.70137	-1.26789	0.135998	29.3985	9.11782e-19	2.11012e-18
IFNGR1	-4.22051	-4.62096	-4.8704	0.0855907	28.0096	6.80736e-18	1.53166e-17
CEBPD	-0.926999	-0.92333	-1.32563	0.102058	25.9928	1.2637e-16	2.76648e-16
THBS1	-1.50021	-1.46841	-1.73847	-0.063257	25.6444	2.09348e-16	4.46242e-16
PLXND1	-0.924007	-1.08189	-1.24816	-0.013688	24.5051	1.09162e-15	2.2672e-15
ABHD15	-2.24683	-2.15478	-2.39105	-0.0141986	24.4561	1.17199e-15	2.37327e-15
S1PR5	-1.31218	-1.15405	-1.4473	-0.388124	23.3055	6.21532e-15	1.2279e-14
PERP	-2.82216	-3.26671	-2.4781	0.489379	23.1565	7.71448e-15	1.48779e-14
IL18RAP	-3.96344	-4.06316	-4.22464	0.235701	22.394	2.33134e-14	4.39159e-14
NSG1	-0.874852	-1.10302	-1.2173	-0.224954	20.3425	4.57254e-13	8.41763e-13
FEZ1	-0.804185	-0.735851	-0.807364	-0.0243228	19.9657	7.89951e-13	1.42191e-12
SPON1	-1.01884	-1.16817	-1.29136	-0.0665431	19.6746	1.20514e-12	2.12209e-12
PLD1	-0.921393	-0.979117	-0.939497	0.0245216	18.4266	7.36926e-12	1.27002e-11
MATN2	-0.709932	-0.701816	-0.741555	-0.00803894	17.2363	4.14397e-11	6.87071e-11
TEC	-0.681994	-0.723336	-0.767114	-0.041645	17.2342	4.15635e-11	6.87071e-11
SGK3	-1.78558	-2.10891	-1.99396	-0.24227	16.2883	1.63896e-10	2.65511e-10
RAB6B	-0.675452	-0.695654	-0.676365	-0.00963973	15.2073	7.85843e-10	1.2481e-09
CCSAP	-0.835155	-1.01592	-1.13675	-0.065777	14.1594	3.58781e-09	5.58871e-09
KIF5C	-1.0374	-1.04821	-1.28665	0.0128146	13.6261	7.76774e-09	1.18714e-08
C8orf44-SGK3	-1.7066	-2.04595	-1.91435	-0.276984	13.0844	1.70179e-08	2.54467e-08
MIR600HG	-0.623235	-0.62298	-0.62393	-0.00148917	13.0739	1.72786e-08	2.54467e-08
LAIR1	-1.56518	-1.87855	-1.61868	-0.512237	12.9509	2.06455e-08	2.98622e-08
PLCB1	-0.586994	-0.657288	-0.766107	-0.0805	12.1952	6.15966e-08	8.7532e-08
RNF43	-0.834152	-0.811814	-0.788814	-0.127081	11.5835	1.49125e-07	2.08261e-07
ROBO3	-0.588793	-0.593908	-0.643994	-0.0615343	10.7306	5.10995e-07	7.01535e-07
SYCP2	-0.928416	-0.734411	-0.891048	-0.00957952	10.5718	6.42527e-07	8.67411e-07
CXXC5	-0.702334	-0.624113	-0.631311	-0.0173092	9.41272	3.41256e-06	4.53143e-06
PRR5	-2.0727	-1.98986	-1.96177	-0.0705533	9.19534	4.66512e-06	6.09476e-06
ULBP3	-0.952682	-0.779144	-0.914626	0.0750049	9.1588	4.91682e-06	6.32163e-06
SNORA72	-0.673078	-0.690429	-0.706625	-0.0198659	9.01759	6.02335e-06	7.62331e-06
FAM169A	-0.803675	-0.837478	-0.919534	-0.124112	8.97621	6.39241e-06	7.96593e-06
TBC1D31	-1.85818	-1.71215	-1.80566	0.0318666	8.78109	8.46062e-06	1.03835e-05
DNAH1	-1.47629	-1.45391	-1.32148	-0.0720302	8.01008	2.55677e-05	3.09102e-05
PRR5-ARHGAP8	-1.63224	-1.63217	-1.56332	-0.0416243	7.74872	3.7171e-05	4.42772e-05
CAPN12	-1.05085	-0.898654	-1.01778	0.0305265	7.66882	4.16722e-05	4.89196e-05
SNORD34	-0.885334	-0.889128	-0.974887	-0.0123528	7.24158	7.67396e-05	8.87987e-05
TMEM117	-0.866165	-0.72808	-0.821417	-0.00797944	7.062	9.91572e-05	0.000113123
FAHD2B	-1.02806	-1.0416	-1.19781	0.0450266	7.04867	0.00010106	0.000113693
LRRC1	-0.643279	-0.692304	-0.635302	-0.00439961	7.01721	0.000105698	0.000117281
CXCL16	-1.07296	-1.07929	-1.10135	-0.0349442	6.43285	0.000242906	0.000265883
FBXO4	-1.23815	-1.39473	-1.29207	-0.0841729	6.28525	0.000299579	0.000323545
ZNF76	-2.02936	-1.90662	-1.76165	-0.129036	5.93507	0.00049231	0.000524698
IQCG	-0.996896	-1.06221	-0.931427	-0.0011402	5.54693	0.000852519	0.000896805
MED11	-1.41397	-1.38056	-1.29199	-0.0932859	5.40437	0.00104255	0.00108265
MSANTD2	-0.750305	-0.691997	-0.68286	0.0183516	5.37499	0.00108666	0.00111417
HACL1	-1.75704	-1.63487	-1.51328	-0.0363346	5.10801	0.00158278	0.00160257
ZNF577	-0.855613	-0.837335	-0.788767	-0.0719179	4.5751	0.00334261	0.00334261
CRC_Normal
MVB12B	-3.72154	-2.4487	-4.19399	0.367422	54.1164	2.28185e-33	1.52884e-31
SLC4A10	-2.66532	-3.05175	-3.1524	0.0862057	28.0308	1.11371e-17	3.24295e-16
WWTR1	-2.08714	-1.70698	-2.09261	0.0205461	27.7719	1.60473e-17	3.24295e-16
P4HA2	-1.1883	-1.14987	-1.18376	-0.0140645	27.639	1.93609e-17	3.24295e-16
CA2	-1.46084	-1.57781	-1.59912	0.00237609	25.5206	3.86744e-16	5.18238e-15
RORC	-2.17385	-2.3844	-2.11	-0.0226249	23.9166	3.75383e-15	4.19178e-14
MANEA	-3.35049	-3.40604	-2.86103	-0.0843858	17.8029	2.25117e-11	2.15469e-10
PLXND1	-2.06278	-2.24422	-2.41645	0.044892	17.0446	6.64535e-11	5.56548e-10
A2M	-2.57901	-2.02162	-2.91042	-0.417753	16.3067	1.90604e-10	1.41894e-09
GPR35	-2.3702	-1.99134	-2.59633	0.250602	14.2326	3.69292e-09	2.47426e-08
RASD1	-1.65262	-1.47602	-1.71423	0.00557538	13.5574	9.69716e-09	5.90645e-08
SLC5A6	-3.1191	-2.47334	-3.05843	0.206613	12.8292	2.74649e-08	1.53346e-07
SH3D21	-1.15446	-1.14367	-1.10649	0.0024181	12.4832	4.50457e-08	2.25688e-07
NFKBID	-3.79979	-3.26234	-4.07045	0.576034	12.4511	4.71587e-08	2.25688e-07
FAM126A	-2.75619	-2.25218	-2.50736	-0.080915	12.1824	6.92437e-08	3.09288e-07
TMEM254-AS1	-1.21392	-1.54595	-1.67536	0.0319298	11.8538	1.10755e-07	4.63785e-07
MPZL2	-1.04482	-1.07246	-1.05125	0.0320452	10.8812	4.44651e-07	1.75245e-06
ADIPOR2	-2.55596	-2.44198	-2.40127	-0.000291857	10.3259	9.82728e-07	3.65793e-06
RGS16	-1.862	-1.62056	-1.95651	-0.284058	10.0411	1.4757e-06	5.00438e-06
IL15	-1.6111	-1.44208	-1.69594	0.021134	10.0325	1.49384e-06	5.00438e-06
ZNF300	-0.974987	-0.936721	-1.0364	0.0369159	9.12181	5.47599e-06	1.7471e-05
NCR3	-1.91168	-1.63879	-1.5832	-0.227939	8.78839	8.80617e-06	2.68188e-05
SPAG17	-1.13259	-1.1713	-1.15745	-0.0329242	8.74307	9.39339e-06	2.73634e-05
MTHFD1L	-1.2625	-1.21152	-1.21355	-0.0729759	8.27063	1.8403e-05	5.04882e-05
ACER3	-2.03262	-1.89261	-1.92548	-0.00387022	8.24596	1.90603e-05	5.04882e-05
PSMD2	-4.55853	-4.23829	-4.20398	-0.318675	8.21102	2.00315e-05	5.04882e-05
TSTD3	-1.40817	-1.4304	-1.36878	-0.0828547	8.20007	2.0346e-05	5.04882e-05
JAG2	-1.01862	-0.879134	-1.09585	0.0444447	7.94642	2.91819e-05	6.98282e-05
PAOX	-1.50921	-1.46568	-1.44874	0.027428	7.89821	3.12517e-05	7.22022e-05
PAQR4	-0.992233	-0.910392	-0.835572	-0.0807896	7.48742	5.60091e-05	0.000125087
SCART1	-0.791223	-0.848613	-0.752875	0.00794158	7.14501	9.103e-05	0.000196742
MORF4L2-AS1	-1.12756	-1.27072	-1.51656	0.027775	7.08046	9.9752e-05	0.000208856
HIST1H2BG	-0.806351	-0.886024	-0.982764	-0.0113366	6.76729	0.000155429	0.000312607
RGS3	-2.57347	-2.40726	-2.1056	0.0884359	6.75286	0.000158636	0.000312607
ARPC5L	-3.28486	-3.16561	-2.85581	-0.342507	6.57628	0.000203649	0.000389842
CDCA4	-2.37492	-2.49069	-2.56067	-0.130255	6.55401	0.000210164	0.000391138
AMIGO2	-1.6689	-1.49437	-1.61878	-0.240983	6.51921	0.000220761	0.000399757
GTF3C4	-1.28767	-1.25666	-1.31304	0.011147	6.33872	0.000284887	0.000502301
GSTCD	-1.28417	-1.2501	-1.13604	0.0343165	6.18365	0.000354596	0.000606299
SHMT1	-2.113	-1.94406	-2.07682	0.0162031	6.16907	0.00036197	0.000606299
PLEKHH2	-0.628928	-0.709815	-0.743863	0.0135492	6.0847	0.000407714	0.000666264
CSNK1G2	-1.88714	-1.7339	-2.1894	0.084522	6.04948	0.000428473	0.000683516
CENPK	-2.26907	-2.2933	-2.52416	-0.398749	6.02785	0.000441738	0.00068829
LINC01137	-0.970486	-1.0316	-1.12197	-0.0471424	5.98067	0.000472111	0.000718896
LYSMD4	-1.53589	-1.71488	-1.60945	0.0237071	5.80321	0.000606168	0.000902516
NDUFS8	-3.31437	-3.13946	-3.3284	-0.142558	5.6784	0.000722538	0.0010276
IPMK	-1.53771	-1.45884	-1.33159	-0.0412376	5.6696	0.000731536	0.0010276
SLC44A1	-1.96844	-1.95512	-2.35049	0.122901	5.66509	0.000736189	0.0010276
CXXC1	-3.03844	-3.26337	-3.15862	0.0256223	5.57756	0.000832589	0.00113844
VARS	-1.73814	-1.59944	-1.63763	-0.0378333	5.54742	0.000868618	0.00116395
UNC93B1	-1.28075	-1.2631	-1.45718	0.0846784	5.52876	0.000891684	0.00117143
FAR1	-2.63649	-2.387	-2.72997	0.0525096	5.47683	0.000959162	0.00123584
ZNF738	-1.51296	-1.40477	-1.33374	0.0200642	5.33708	0.00116702	0.00147529
MLEC	-2.50583	-2.42469	-2.34172	-0.0209445	5.01664	0.00182823	0.00226836
MYO1D	-1.10913	-1.18217	-1.10414	0.0610923	4.88629	0.00219368	0.0026723
ARHGAP27P1	-1.41916	-1.43045	-1.45001	-0.0743805	4.61205	0.00321617	0.00384791
MOCS3	-1.03685	-1.12349	-1.16249	0.00294407	4.56149	0.00345077	0.00405617
JRKL	-1.08652	-1.13857	-1.23347	-0.0299701	4.51014	0.00370645	0.00428159
LRWD1	-1.6314	-1.55595	-1.74036	-0.00339293	4.48017	0.00386423	0.00438819
RANGAP1	-2.06242	-2.25346	-2.31786	-0.0916756	4.43667	0.00410522	0.00458417
NBPF3	-1.276	-1.25397	-1.39894	0.0367733	4.36501	0.00453508	0.0049059
RPL13P5	-0.739488	-0.765175	-0.849882	0.020715	4.36426	0.00453979	0.0049059
CRK	-1.99791	-1.89796	-1.89212	0.0592985	4.34189	0.00468305	0.00498039
ULK1	-1.27094	-1.29068	-1.40471	-0.0240976	4.28218	0.00508771	0.00532619
VWDE	-0.911639	-0.874439	-0.873933	0.0167108	4.2139	0.00559305	0.00576514
KCNAB3	-0.593565	-0.610071	-0.592704	-0.00475078	3.86195	0.00909917	0.00923704
ZSWIM1	-0.670783	-0.705055	-0.70661	-0.0207985	3.77534	0.0102525	0.0102525
CRC_Blood
SLC4A10	-6.39735	-6.51231	-6.51278	-0.00141043	533.67	4.2295e-273	4.2718e-271
KLRG1	-5.67742	-2.20399	-7.19916	1.22218	306.127	2.16191e-171	1.09176e-169
A2M	-4.6348	-1.85793	-5.80398	1.02259	265.036	5.07037e-151	1.70702e-149
GZMK	-6.80013	-3.8242	-7.45027	-0.254626	237.229	7.84204e-137	1.98011e-135
ME1	-1.95561	-1.96187	-1.96489	0.00287984	183.165	3.05285e-108	6.16677e-107
PZP	-4.17146	-2.23168	-4.96043	0.707875	169.685	6.77548e-101	1.14054e-99
LINC00612	-2.98879	-1.41871	-3.53479	0.522112	124.498	1.34955e-75	1.94721e-74
LTK	-2.06984	-2.1727	-2.10704	0.00185826	114.542	7.07402e-70	8.93095e-69
ABCB1	-3.71385	-2.6429	-4.18146	-0.428953	97.7196	4.33611e-60	4.86608e-59
ZBTB16	-3.48579	-3.84038	-3.42226	-0.0976908	80.3821	7.76129e-50	7.8389e-49
COLQ	-3.28994	-3.51456	-3.46848	0.0528829	80.273	9.01579e-50	8.27813e-49
TSPAN15	-1.73526	-1.86876	-1.83925	0.0262902	73.7201	7.49982e-46	6.31235e-45
SYTL2	-3.19884	-2.23118	-4.5126	-0.378484	73.1085	1.74648e-45	1.35688e-44
ADAM12	-1.41062	-1.57613	-0.603714	-0.106824	69.9733	1.34114e-43	9.67537e-43
DPP4	-1.97574	-3.36664	-3.51268	0.227897	65.4935	6.77768e-41	4.56364e-40
NCR3	-3.79528	-3.10546	-3.50664	0.142592	57.8632	2.89999e-36	1.83062e-35
KLRB1	-5.42393	-6.29746	-6.34415	-0.310965	57.1258	8.16147e-36	4.84887e-35
MYBL1	-2.51349	-1.88005	-3.11572	0.22118	56.3606	2.3896e-35	1.34083e-34
CPNE2	-2.18486	-1.57687	-1.11898	0.0988668	53.4218	1.49081e-33	7.92481e-33
PLEKHG5	-0.769785	-1.45121	-0.804934	-0.0241069	49.2806	5.14272e-31	2.59707e-30
TLE1	-1.43225	-1.36236	-1.47417	-0.00260744	48.6605	1.23608e-30	5.94497e-30
RORC	-1.58144	-2.10796	-1.58813	0.022342	46.8752	1.54761e-29	7.10494e-29
LINC00987	-1.40077	-0.785239	-1.51979	0.122246	46.4119	2.98365e-29	1.31021e-28
TMIGD2	-1.12515	-1.95902	-2.2732	-0.214072	45.9115	6.06581e-29	2.5527e-28
CXXC5	-1.65779	-1.53972	-1.54066	0.000752627	45.8363	6.74774e-29	2.72609e-28
SCRN1	-1.0613	-1.05102	-1.09097	0.0157833	44.0155	8.94187e-28	3.47357e-27
RRAS2	-2.08308	-1.71797	-2.33732	-0.0283815	42.393	8.97458e-27	3.35716e-26
A2M-AS1	-1.88895	-1.2364	-2.27544	0.290453	41.7793	2.14884e-26	7.75116e-26
CEBPD	-1.44992	-1.37276	-1.46632	-0.156854	41.2857	4.33867e-26	1.51106e-25
FEZ1	-1.32718	-1.12977	-1.34271	0.0488922	38.6132	1.95721e-24	6.58928e-24
TMEM71	-1.56812	-1.963	-3.25197	0.232434	37.9418	5.10366e-24	1.6628e-23
FKBP11	-2.15007	-1.90002	-3.6036	0.272664	37.0898	1.72315e-23	5.4387e-23
PHACTR2	-2.27534	-3.10531	-1.7328	-0.480061	36.7533	2.78708e-23	8.53016e-23
GPR65	-3.20881	-2.15059	-3.43693	-0.42368	36.274	5.53016e-23	1.64278e-22
CCR1	-1.4289	-0.870317	-1.3169	-0.396019	35.1165	2.89542e-22	8.35536e-22
CXCR6	-3.46654	-2.42779	-3.09621	-1.95643	33.3447	3.66113e-21	1.02715e-20
ERN1	-1.75988	-2.32491	-2.84449	-0.122553	32.2923	1.65511e-20	4.51801e-20
IL23R	-0.999933	-1.48437	-0.955348	-0.29793	31.8757	3.0084e-20	7.996e-20
P2RY14	-1.38969	-1.50993	-1.38562	-0.0511693	31.2818	7.05394e-20	1.82679e-19
JAML	-3.15653	-4.06222	-3.02823	-0.48397	26.683	5.24195e-17	1.32359e-16
ATF7IP2	-1.41625	-2.1532	-1.71545	0.339877	23.9894	2.54071e-15	6.25882e-15
PRR5	-2.31804	-1.60713	-1.99537	0.238866	22.3578	2.67322e-14	6.42846e-14
LST1	-1.98161	-2.07147	-2.05516	0.0437855	22.3366	2.75637e-14	6.47427e-14
PRR5-ARHGAP8	-1.9527	-1.34811	-1.61626	0.196435	21.0966	1.6505e-13	3.78865e-13
IL18RAP	-2.25778	-2.1588	-2.64883	-0.557516	20.9502	2.03894e-13	4.57629e-13
RARG	-1.20813	-1.63599	-1.42083	0.178522	19.8129	1.05342e-12	2.31294e-12
SESN1	-2.98048	-3.48934	-3.09081	0.0363754	18.5021	6.99739e-12	1.50369e-11
CAPN12	-1.32994	-0.951657	-1.32639	-0.00425285	18.333	8.93315e-12	1.87968e-11
SCART1	-0.707431	-0.78034	-0.79989	0.0141347	17.9603	1.53055e-11	3.1548e-11
ELOVL4	-0.834348	-0.829953	-0.898531	0.00137665	17.6294	2.46882e-11	4.98701e-11
DUSP1	-4.33412	-4.29836	-4.27854	-1.9219	16.5569	1.16262e-10	2.30244e-10
IFNGR1	-3.28943	-3.13941	-3.38128	-0.244106	16.5235	1.22018e-10	2.36996e-10
B3GALT2	-0.694316	-0.947117	-0.669398	-0.0241091	16.2834	1.72607e-10	3.28931e-10
NSG1	-1.3775	-1.37729	-1.97584	0.346617	15.7804	3.56969e-10	6.67664e-10
PLXND1	-1.13689	-1.18419	-1.27703	-0.02912	15.3375	6.76918e-10	1.24307e-09
SLC17A3	-0.604567	-0.633849	-0.649534	0.0186973	14.8643	1.34081e-09	2.41825e-09
FOSL2	-1.43114	-1.00663	-1.12196	-1.05986	14.6205	1.9065e-09	3.37818e-09
GALNT3	-1.22665	-0.853275	-1.20143	0.045993	14.4808	2.33281e-09	4.06231e-09
CXCR4	-2.38634	-2.02671	-3.04098	-1.78886	14.2887	3.07868e-09	5.27028e-09
C10orf128	-1.95235	-2.06472	-2.17435	-0.0284701	14.2502	3.25457e-09	5.47853e-09
CCR2	-1.5342	-1.68778	-1.55547	0.0384585	14.1113	3.97716e-09	6.58514e-09
FLT4	-0.775471	-0.733889	-0.784958	0.0339594	13.5645	8.75773e-09	1.42666e-08
ODF2L	-1.87147	-2.41471	-1.67063	-0.221341	13.5125	9.44125e-09	1.5136e-08
METTL1	-1.19917	-1.20526	-1.21938	0.0393197	13.2417	1.3955e-08	2.20228e-08
KIF5C	-1.05724	-1.21596	-1.16708	-0.0401732	11.992	8.46469e-08	1.31528e-07
RGS2	-1.97239	-1.56204	-2.07694	-2.08901	11.981	8.59984e-08	1.31604e-07
RORA	-2.66669	-2.91837	-2.30663	-0.170794	11.8687	1.01108e-07	1.52416e-07
CD69	-1.87298	-2.02122	-2.80123	-1.77006	11.1277	2.94055e-07	4.36758e-07
B4GALT1	-2.38191	-1.97121	-2.38997	-0.423036	11.0547	3.26639e-07	4.78123e-07
ALOX5AP	-2.3588	-2.43878	-3.10867	-0.414154	10.8945	4.11378e-07	5.9356e-07
UAP1	-1.66403	-1.49938	-1.90706	-0.27153	10.8652	4.29097e-07	6.10406e-07
MPZL3	-1.11489	-1.45917	-1.19311	-0.471618	10.2074	1.10554e-06	1.55083e-06
FSD1	-0.64722	-0.709811	-0.777913	-0.0858262	10.1575	1.18771e-06	1.64328e-06
PROCR	-0.753843	-0.711193	-0.776289	0.049508	9.98925	1.51271e-06	2.06464e-06
ELOVL6	-0.758844	-0.721042	-0.978314	-0.0253562	9.93401	1.63771e-06	2.20544e-06
MID2	-0.592721	-0.740631	-0.854838	0.0961126	9.89419	1.73417e-06	2.30462e-06
CYB5A	-1.62838	-1.47786	-1.73387	0.0404012	9.69012	2.32498e-06	3.04965e-06
NEO1	-0.619891	-0.596941	-0.723119	0.0184564	8.78703	8.4957e-06	1.10008e-05
ARL4C	-2.27203	-1.77659	-2.14037	0.442527	8.6986	9.64352e-06	1.23291e-05
C1QTNF6	-0.748896	-0.669078	-0.627247	-0.0296853	8.25254	1.82654e-05	2.306e-05
APOL3	-1.91715	-1.65006	-2.23832	0.215461	7.91916	2.94227e-05	3.66875e-05
SPON1	-0.657446	-0.79902	-0.776683	-0.0990307	7.36282	6.51091e-05	8.01954e-05
PLCB1	-0.597784	-0.592203	-0.770932	0.0311666	7.25373	7.60662e-05	9.25625e-05
CYTH3	-0.72971	-0.777617	-0.770743	-0.110594	7.14457	8.88679e-05	0.000106853
RIC8B	-1.16377	-1.28948	-1.1492	0.0877715	6.98456	0.000111612	0.000132287
STK3	-0.799015	-0.796048	-0.779876	-0.0674438	6.97812	0.00011264	0.000132287
LOC100506990	-0.958849	-1.17565	-1.15441	-0.122286	6.78409	0.000148454	0.000172343
FICD	-0.785458	-0.720211	-0.782706	0.0210572	6.67469	0.000173436	0.000199057
JUND	-1.23623	-1.19204	-1.04871	-1.02765	6.61504	0.000188777	0.00021423
NRIP1	-0.84244	-0.887422	-0.906355	-0.188107	6.56988	0.000201286	0.000225888
LIN7B	-0.67896	-0.842681	-0.83221	0.0924652	6.4779	0.000229374	0.00025458
C15orf39	-0.704549	-0.663022	-0.81845	0.00507782	5.89631	0.000522978	0.000574139
TP53BP2	-0.864132	-0.888181	-1.11603	-0.110945	5.81901	0.000583388	0.000633572
CD2AP	-1.20046	-1.17924	-1.34348	-0.0418145	5.78404	0.000612946	0.000658591
CACNA2D4	-0.695535	-0.833491	-0.787199	-0.0330627	5.4913	0.000926594	0.000985116
RELB	-0.934825	-0.958603	-0.882165	-0.671489	4.61648	0.00316504	0.00332989
EAF1	-1.34573	-1.31722	-1.53061	-0.0212175	4.21498	0.00553951	0.00576794
NT5DC3	-0.615716	-0.659568	-0.696328	0.0328174	4.0355	0.00710734	0.00732491
ARNTL	-1.42966	-1.51153	-1.44733	-0.264987	3.50145	0.0148549	0.0151439
KCTD6	-0.72696	-0.777006	-0.788812	0.115936	3.49467	0.014994	0.0151439
HIPK3	-1.30862	-1.34538	-1.32544	-0.0700681	3.45709	0.0157877	0.0157877
HCC_Tumor
SLC4A10	-4.9705	-5.34182	-5.79749	-0.382276	268.896	1.37682e-140	1.36305e-138
ZBTB16	-3.60058	-3.55024	-3.73598	-0.238613	200.854	4.22206e-110	2.08992e-108
ABCB1	-4.07546	-2.01598	-5.25222	0.203201	154.75	9.08026e-88	2.99649e-86
CD69	-2.50939	-1.79513	-6.25141	1.13423	150.988	7.02757e-86	1.73932e-84
KLRB1	-3.36043	-5.73639	-7.01092	0.0560012	144.288	1.72417e-82	3.41386e-81
GPR171	-2.01888	-1.25035	-5.60545	0.147046	133.786	4.16146e-77	6.86641e-76
KLRG1	-3.44117	-3.04769	-6.44514	-0.522365	128.049	3.94095e-74	5.57363e-73
ME1	-2.08857	-2.09206	-2.2185	-0.0833311	124.017	5.04845e-72	6.24746e-71
COLQ	-3.67072	-3.8478	-3.95554	-0.207118	121.667	8.66379e-71	9.53017e-70
CD160	-3.35654	-2.45605	-3.2689	-0.184262	102.039	2.66266e-60	2.63603e-59
TLE1	-1.78832	-1.83218	-1.99539	-0.0856073	99.8138	4.31598e-59	3.88438e-58
SYTL2	-2.2043	-2.08191	-5.15331	0.0708941	93.3215	1.54312e-55	1.27308e-54
A2M	-2.21349	-2.36155	-4.47959	-0.404477	84.3301	1.48186e-50	1.12849e-49
PLAC8	-1.59323	-2.84547	-3.80792	-1.31476	74.829	3.27109e-45	2.31313e-44
DPP4	-1.65421	-3.53938	-3.44348	-0.364014	70.5629	8.73188e-43	5.76304e-42
NCR3	-3.9483	-3.38597	-3.07275	0.05492	69.7273	2.62041e-42	1.62138e-41
LTK	-1.40014	-1.65353	-1.77289	-0.0974203	64.2054	3.87739e-39	2.25801e-38
JAML	-3.43421	-1.54485	-4.43069	0.196162	60.5177	5.26887e-37	2.89788e-36
TMIGD2	-1.93466	-2.00457	-2.49125	-0.241093	59.1968	3.0824e-36	1.60609e-35
TMEM71	-1.72619	-1.96087	-3.57268	-0.30263	57.6709	2.38366e-35	1.17991e-34
FEZ1	-1.34972	-1.30424	-1.45116	-0.0376852	54.126	2.81581e-33	1.32746e-32
RORC	-1.78676	-2.42633	-2.17865	-0.136218	53.3927	7.58219e-33	3.41199e-32
PIP4K2A	-2.50632	-1.3977	-3.74569	-0.263505	53.2995	8.60036e-33	3.7019e-32
SCRN1	-0.962907	-0.975004	-1.02549	-0.0337506	51.8194	6.37621e-32	2.63019e-31
GPR65	-2.0924	-1.71887	-3.94946	-0.0806831	50.1649	6.01903e-31	2.38353e-30
LINC00612	-1.97145	-1.94327	-3.24804	-0.195087	47.9027	1.30891e-29	4.98391e-29
PZP	-1.78479	-1.94096	-3.20192	-0.257931	47.4308	2.49203e-29	9.13743e-29
ERN1	-1.56007	-2.1875	-3.30944	-0.284516	47.3371	2.83171e-29	1.00121e-28
ADRB2	-1.12138	-1.82653	-3.08537	-0.261078	45.0728	6.26444e-28	2.13855e-27
PTGER2	-2.01946	-1.89832	-3.74369	-0.582655	44.3615	1.66073e-27	5.48041e-27
DKK3	-1.36947	-1.20641	-1.51905	-0.0464703	43.4856	5.52654e-27	1.76493e-26
KIF5C	-1.66462	-1.66714	-1.87478	0.00199073	42.39	2.49215e-26	7.71009e-26
PRSS35	-0.770975	-0.717309	-0.763264	-0.0432612	41.0565	1.56414e-25	4.69242e-25
SATB1	-1.20709	-2.21057	-2.77675	-0.919338	40.03	6.44834e-25	1.87761e-24
S1PR5	-1.87951	-1.70142	-2.77552	-0.419609	39.9716	6.99034e-25	1.97727e-24
IL23R	-1.75577	-2.15916	-1.22892	0.0389277	38.3003	7.05378e-24	1.93979e-23
ADAM12	-1.38493	-1.60895	-0.71661	-0.040206	38.1103	9.17632e-24	2.45528e-23
CHD7	-0.990735	-1.64741	-2.07328	-0.211751	37.931	1.17654e-23	3.06519e-23
LST1	-1.6454	-1.81152	-1.04307	-0.0500441	37.4991	2.14094e-23	5.4347e-23
TNFSF14	-2.03156	-2.00387	-3.46769	0.163728	36.9033	4.89282e-23	1.21097e-22
IFNGR1	-1.66824	-2.97969	-3.30443	-0.226176	35.0613	6.33103e-22	1.52871e-21
IL18RAP	-2.04526	-2.7076	-3.36781	0.0256953	34.2299	2.01562e-21	4.7511e-21
PLCB1	-1.12728	-1.35978	-1.62676	-0.107489	33.6874	4.29412e-21	9.88645e-21
TSPAN15	-0.945977	-1.09831	-1.19468	-0.098787	33.4302	6.14813e-21	1.38333e-20
RUNX2	-1.38394	-1.6369	-2.57137	-0.134958	30.5087	3.65678e-19	8.04493e-19
PDCD4	-1.33352	-1.21318	-2.78932	-0.158685	29.0854	2.6938e-18	5.79753e-18
NRIP1	-1.3448	-1.65842	-0.967131	-0.0199299	29.0694	2.75496e-18	5.803e-18
PILRB	-1.87915	-1.15374	-2.76692	-0.230754	27.7021	1.88325e-17	3.8842e-17
PLD1	-0.851366	-0.915807	-1.00222	-0.0399916	27.2085	3.77325e-17	7.62351e-17
CAPN12	-1.83424	-1.17904	-1.77106	0.127205	26.6511	8.27348e-17	1.63815e-16
CERK	-1.40977	-2.52164	-2.41044	-0.187766	26.0277	1.99268e-16	3.86815e-16
SESN1	-1.7214	-2.59532	-2.74689	-0.458647	25.2632	5.86134e-16	1.11591e-15
FLT4	-0.812613	-0.775259	-0.812426	-0.0607961	24.9231	9.47491e-16	1.76984e-15
LINC00987	-1.15094	-0.794917	-1.40815	-0.0834693	23.4172	7.9674e-15	1.46069e-14
LYSMD2	-1.51793	-1.02518	-2.35716	-0.030028	23.2959	9.46057e-15	1.7029e-14
THRA	-1.27399	-1.53724	-1.46104	-0.239844	23.1646	1.13937e-14	2.01423e-14
NR1D1	-1.25311	-1.77009	-1.42406	-0.256349	22.6419	2.3886e-14	4.14863e-14
SIPA1	-1.53536	-1.0198	-2.32273	-0.0417697	22.1623	4.71342e-14	8.04532e-14
PLXND1	-0.919175	-1.1946	-1.634	-0.0475524	21.9827	6.08018e-14	1.02023e-13
CEBPD	-0.894153	-0.938814	-1.24389	-0.0833297	21.542	1.13587e-13	1.87419e-13
P2RY14	-0.804486	-0.780443	-0.809876	-0.0430154	21.1773	1.90563e-13	3.09275e-13
A2MP1	-1.20601	-0.948367	-1.43977	-0.115652	20.2347	7.26647e-13	1.16029e-12
PDK3	-1.21306	-1.70294	-2.39573	-0.255296	18.925	4.67704e-12	7.34964e-12
FSD1	-0.807954	-0.747015	-0.85263	0.0269828	18.4482	9.21723e-12	1.42579e-11
A2M-AS1	-1.00969	-0.94031	-1.47352	-0.0867294	16.9398	7.89872e-11	1.20304e-10
TBC1D31	-1.61076	-1.38407	-2.01831	0.00892694	16.6726	1.15592e-10	1.73389e-10
DSE	-0.755771	-1.14382	-1.47342	-0.129009	16.5908	1.29887e-10	1.91923e-10
DUSP1	-2.40079	-2.11429	-2.93204	0.8469	16.1091	2.58149e-10	3.75835e-10
CLIP4	-1.45425	-1.07574	-2.12856	0.0178147	15.8388	3.79548e-10	5.44568e-10
MAFF	-0.969674	-0.619484	-0.959751	0.0405017	15.5625	5.6282e-10	7.95988e-10
B3GNT8	-0.685006	-0.760285	-0.766772	-0.0161362	15.389	7.20926e-10	1.00524e-09
PTCH1	-1.02978	-1.09424	-1.2856	-0.187542	14.5117	2.52084e-09	3.46616e-09
RAB18	-2.16974	-2.02973	-2.49416	0.0229454	13.3406	1.34118e-08	1.81886e-08
LOC100507346	-0.673109	-0.661755	-0.798974	-0.100753	13.0787	1.94927e-08	2.6078e-08
HACL1	-2.01449	-1.91451	-2.02432	-0.0567867	12.8246	2.80185e-08	3.69844e-08
PIM1	-1.86931	-1.72901	-2.45246	-0.0833743	10.753	5.38993e-07	7.0211e-07
GALC	-1.65667	-1.64528	-1.71198	-0.0257718	10.5409	7.29352e-07	9.37739e-07
RETREG1	-0.652456	-0.737653	-1.01204	-0.0805084	9.65642	2.57409e-06	3.26711e-06
EAF1	-1.20014	-1.42644	-1.81925	0.108015	9.30649	4.2377e-06	5.31053e-06
PRR5	-1.22046	-1.1172	-1.42703	-0.209234	9.05915	6.02686e-06	7.45824e-06
B3GALT2	-0.622476	-0.80744	-0.773747	-0.0979686	8.47618	1.38145e-05	1.67672e-05
OSTF1	-1.37844	-1.2619	-1.97675	0.199535	8.47245	1.3888e-05	1.67672e-05
TP53I11	-1.35742	-1.14329	-1.05137	0.210366	8.02191	2.63465e-05	3.14254e-05
PRR5-ARHGAP8	-0.971843	-0.963591	-1.12228	-0.22117	7.80947	3.56235e-05	4.19849e-05
TSPOAP1	-1.01667	-0.906589	-1.10813	0.0704455	6.7805	0.000153101	0.000178318
APOL3	-1.5128	-1.73292	-1.55638	-0.122292	6.64271	0.000186029	0.00021415
INTS5	-0.96689	-0.785959	-0.85265	-0.0581194	6.606	0.000195936	0.000222961
MMD	-0.931758	-1.07621	-1.07191	0.148092	6.44596	0.000245635	0.00027634
JUNB	-1.35045	-1.32415	-1.76981	0.585801	6.11913	0.000389522	0.000433289
ARL14EP	-0.948817	-0.965381	-1.28686	-0.208054	6.07294	0.000415721	0.000457293
ABHD15	-0.775026	-0.68679	-0.861667	0.0114171	5.76704	0.000639469	0.000695686
NEK7	-1.40177	-1.38679	-1.09367	0.0238483	5.72106	0.000682181	0.000734086
TGFBRAP1	-0.683475	-0.676982	-0.797857	-0.00629317	5.62992	0.000775411	0.000825437
TMEM128	-1.3815	-1.26117	-1.10631	0.174564	5.61165	0.000795571	0.000837888
YWHAH	-1.31668	-1.23795	-0.994169	0.0507631	5.53319	0.000888241	0.000925641
SLC15A4	-0.823261	-0.665277	-0.797524	-0.0320823	5.39384	0.0010801	0.00111385
LOC643733	-1.1386	-1.01132	-1.17101	-0.0038005	4.67671	0.00294387	0.00300456
BTG1	-1.03788	-1.06886	-1.07018	-0.140227	4.23477	0.00544081	0.00549633
FAM160A2	-0.841104	-0.799643	-0.89246	-0.0517079	4.11766	0.00639877	0.00639877
HCC_Normal
SLC4A10	-7.29189	-7.57854	-8.27379	1.49587	303.622	2.27927e-132	2.27927e-130
TARP	-5.39091	-1.96677	-8.38968	1.03004	153.022	1.09161e-78	5.45805e-77
ZBTB16	-4.11831	-4.16042	-4.02438	0.46048	140.023	3.39521e-73	1.13174e-71
IL7R	-1.16141	-6.05125	-3.66419	1.1765	107.583	1.06198e-58	2.65494e-57
CD160	-4.47146	-2.48719	-4.60222	0.738657	107.337	1.38129e-58	2.76258e-57
COLQ	-4.10862	-4.68475	-4.64986	0.897443	95.4499	5.8169e-53	9.69483e-52
KLRG1	-4.89083	-4.64123	-8.00084	1.16653	94.065	2.70139e-52	3.85913e-51
KLRB1	-3.67203	-5.81621	-8.10168	1.91699	88.5075	1.35833e-49	1.69791e-48
NCR3	-4.01649	-3.34945	-3.57947	0.433939	84.8885	8.20946e-48	9.12163e-47
ME1	-2.66081	-2.54182	-2.71824	0.366493	82.0316	2.15324e-46	2.15324e-45
TMIGD2	-3.49314	-3.27197	-3.96841	0.586833	81.0002	7.04717e-46	6.40651e-45
PRF1	-4.24366	-1.34889	-4.61808	0.458951	66.5276	1.71301e-38	1.42751e-37
TLE1	-2.13598	-2.30641	-2.4177	0.342429	58.7849	2.05383e-34	1.57987e-33
A2M	-3.15213	-3.21196	-5.67216	0.766407	57.7132	7.66282e-34	5.47344e-33
GPR171	-3.07783	-2.2022	-6.66751	1.49638	51.4034	1.94104e-30	1.29403e-29
ABCB1	-3.46495	-2.43699	-4.81574	0.738117	49.9465	1.21052e-29	7.56576e-29
DKK3	-2.13849	-1.71681	-2.2536	0.289511	49.4414	2.28766e-29	1.34568e-28
IL18RAP	-3.13349	-4.48939	-5.12435	1.45327	49.2657	2.85492e-29	1.58607e-28
RUNX2	-2.6317	-3.2946	-3.86407	0.500193	46.0878	1.60396e-27	8.44192e-27
LST1	-2.25663	-2.11963	-2.16118	0.397261	44.3385	1.49738e-26	7.48692e-26
CEBPD	-1.8157	-2.27628	-2.26496	0.423036	42.5074	1.57162e-25	7.48389e-25
FLT4	-1.51732	-1.43695	-1.52212	0.198352	41.8639	3.60156e-25	1.63707e-24
CD69	-2.2104	-1.92908	-6.4136	1.86694	41.4408	6.21819e-25	2.70356e-24
DPP4	-2.42514	-4.54196	-3.59097	1.15704	41.1053	9.592e-25	3.87485e-24
PZP	-2.54271	-2.2293	-4.54072	0.580916	41.0977	9.68712e-25	3.87485e-24
PIK3AP1	-2.42528	-0.931034	-2.69819	0.263921	40.9575	1.16123e-24	4.46629e-24
SATB1	-3.06274	-4.06997	-4.26754	0.842816	40.8178	1.39117e-24	5.1525e-24
LTK	-1.82729	-2.30491	-2.21631	0.475012	40.7515	1.51581e-24	5.41361e-24
RORC	-2.43674	-2.73077	-2.78941	0.523101	40.2351	2.9591e-24	1.02038e-23
JAML	-3.9737	-2.87387	-4.59212	1.03455	39.3581	9.2366e-24	3.07887e-23
TBC1D31	-2.80014	-2.47217	-3.35705	0.56361	37.6288	8.79224e-23	2.83621e-22
P2RY14	-1.25576	-1.31739	-1.06499	0.12263	35.6807	1.12869e-21	3.52717e-21
IL23R	-2.01549	-2.89213	-3.1181	0.729707	34.8176	3.51386e-21	1.06481e-20
SPON1	-1.53036	-1.48581	-1.24707	0.230079	34.26	7.32906e-21	2.15561e-20
IFNGR1	-2.47355	-3.6088	-5.34838	1.52609	33.8977	1.18255e-20	3.37871e-20
S1PR5	-2.36198	-1.98505	-3.79262	0.433561	28.99	8.11171e-18	2.25325e-17
SESN1	-2.77736	-3.63614	-3.46497	0.984681	28.6041	1.36119e-17	3.6789e-17
LINC00612	-2.04791	-2.10367	-3.7366	0.519658	28.5381	1.48716e-17	3.91359e-17
SCRN1	-0.963438	-0.964045	-0.927923	0.110711	28.1029	2.66839e-17	6.84203e-17
TSPAN15	-1.27151	-1.81195	-1.78871	0.36488	26.9716	1.22358e-16	3.05894e-16
NRIP1	-1.59007	-1.69556	-1.51795	0.187116	26.9244	1.30391e-16	3.18028e-16
PLD1	-1.2382	-1.37631	-1.23681	0.225015	26.8251	1.49073e-16	3.54937e-16
MYBL1	-1.28746	-2.15132	-3.41178	0.731274	26.7145	1.73078e-16	4.02506e-16
LOC643733	-2.61974	-2.40362	-2.88073	0.635514	26.593	2.03917e-16	4.63449e-16
PLAC8	-1.10038	-2.69212	-3.49578	0.186125	26.5537	2.15004e-16	4.77787e-16
CCR6	-2.00721	-3.75553	-2.24358	1.03396	26.4757	2.38884e-16	5.19312e-16
PARP8	-1.60357	-1.44706	-4.1047	1.38653	25.5615	8.22278e-16	1.74953e-15
SYTL2	-1.46059	-1.4859	-5.1814	1.428	25.5383	8.48507e-16	1.76772e-15
BLK	-0.842432	-0.881402	-0.858865	0.0952426	24.1039	5.94065e-15	1.21238e-14
NCAM1	-1.34904	-1.06786	-1.55325	0.24086	23.7599	9.48413e-15	1.89683e-14
CCR1	-1.84771	-1.1065	-1.05962	0.0177821	23.5687	1.23034e-14	2.41243e-14
DBN1	-1.07013	-0.827884	-1.05795	-0.0068909	23.4956	1.35916e-14	2.61378e-14
ERN1	-1.03712	-2.51073	-3.13379	1.30568	23.3443	1.67024e-14	3.15139e-14
FEZ1	-1.12468	-1.00718	-1.16644	0.109687	22.9673	2.79237e-14	5.17106e-14
A2MP1	-1.57436	-1.30424	-2.13203	0.245044	22.5735	4.77903e-14	8.68915e-14
RORA	-1.22528	-2.82384	-2.42933	0.912018	22.4642	5.54817e-14	9.90744e-14
NR1D1	-1.71874	-2.15795	-1.33086	0.254744	22.3989	6.06602e-14	1.06421e-13
CA2	-0.999736	-1.01684	-1.08662	0.172709	21.5602	1.90985e-13	3.29285e-13
ADRB2	-1.87203	-1.30178	-4.10361	0.83005	19.5361	3.07459e-12	5.21118e-12
MGAT4A	-1.50488	-1.7891	-4.2908	0.788579	19.4838	3.30431e-12	5.50719e-12
PIP4K2A	-1.82189	-1.0554	-2.6934	1.0229	18.8345	8.08346e-12	1.32516e-11
HACL1	-2.05003	-2.51271	-2.07913	0.47674	18.6165	1.09189e-11	1.76112e-11
TMEM71	-1.44104	-2.10913	-3.49351	0.734312	18.4649	1.34596e-11	2.13645e-11
CD9	-1.191	-1.0371	-1.39264	0.205671	17.4042	5.83038e-11	9.10997e-11
TSPOAP1	-1.56445	-1.33821	-1.45041	0.192884	17.1843	7.90493e-11	1.21614e-10
B3GALT2	-1.34151	-1.7493	-1.3593	0.445856	17.1011	8.87058e-11	1.34403e-10
GPR65	-1.93217	-1.84886	-3.5906	0.647271	16.4433	2.20755e-10	3.29485e-10
CHD7	-0.938364	-1.61176	-2.02445	0.0903346	16.1893	3.14038e-10	4.6182e-10
IRF8	-1.07268	-0.987933	-1.21012	0.0533276	16.0639	3.73698e-10	5.41591e-10
TNFSF14	-1.66913	-1.71643	-3.79715	1.13779	16.0435	3.84469e-10	5.49241e-10
FSD1	-0.768275	-0.777402	-0.895329	0.101242	15.276	1.1169e-09	1.5731e-09
CTSH	-1.19195	-1.87382	-2.38761	0.43604	15.204	1.23443e-09	1.71448e-09
GTF3C1	-1.74207	-1.61148	-2.13321	-0.194851	15.1123	1.40248e-09	1.9212e-09
ODF2L	-1.51682	-2.47747	-1.698	0.361892	14.9853	1.67334e-09	2.26127e-09
S100A6	-1.21625	-0.974786	-1.56132	0.0431372	14.8705	1.96346e-09	2.61795e-09
PDE4D	-1.47514	-2.20823	-2.0056	0.268837	14.7924	2.18878e-09	2.87997e-09
IFT140	-0.871388	-0.887175	-0.953917	0.124338	14.1446	5.39609e-09	7.00791e-09
MIR4680	-1.44874	-0.981497	-2.16491	0.651598	13.6151	1.12928e-08	1.44779e-08
CD96	-1.46526	-1.18416	-2.75116	0.615053	13.2734	1.81932e-08	2.30293e-08
PRSS35	-0.792075	-0.736102	-0.88509	0.151096	13.049	2.48887e-08	3.11108e-08
BBIP1	-1.59644	-1.2823	-2.34982	0.589895	12.6526	4.33015e-08	5.34586e-08
THRA	-0.982187	-1.36913	-1.07795	0.140133	12.3184	6.90859e-08	8.42511e-08
ZNF22	-1.32318	-1.41324	-2.72652	-0.115462	12.2771	7.31923e-08	8.81835e-08
PLCB1	-0.880026	-1.28728	-1.70652	0.441702	12.0394	1.02057e-07	1.21496e-07
METTL24	-0.595218	-0.632017	-0.735118	0.127031	11.8716	1.29058e-07	1.51832e-07
PTPN4	-1.61404	-1.4621	-3.15646	0.719577	11.4938	2.18994e-07	2.54644e-07
CYTH3	-0.959466	-0.835115	-1.21296	0.244229	10.4627	9.28105e-07	1.06679e-06
C10orf25	-0.594829	-0.593733	-1.14665	-0.0649006	10.1292	1.48103e-06	1.68299e-06
LINC00987	-0.831018	-0.983781	-1.46065	0.231651	9.87051	2.12845e-06	2.39151e-06
FKBP2	-0.833004	-1.02841	-1.8324	0.174693	9.85425	2.17752e-06	2.41947e-06
RASGRF2	-0.876811	-1.41367	-1.46541	0.179232	9.82116	2.2809e-06	2.50648e-06
CPNE7	-0.804499	-0.799889	-1.46763	0.0993207	9.54579	3.3555e-06	3.64728e-06
OSTF1	-1.77658	-1.80847	-1.56943	0.397279	9.46883	3.73775e-06	4.01909e-06
KIF5C	-0.742514	-0.978567	-1.03555	0.175996	9.31774	4.61959e-06	4.91446e-06
ATF7IP2	-0.947463	-1.51481	-1.30323	0.186671	9.1689	5.69146e-06	5.99101e-06
LCP1	-0.743094	-0.647174	-0.925771	0.302163	8.31863	1.87441e-05	1.95251e-05
SPATA2L	-0.769383	-0.865127	-0.92945	0.0816258	7.52889	5.66705e-05	5.84232e-05
APOL3	-1.28634	-1.78861	-1.85588	0.520873	7.02961	0.000113981	0.000116307
SVIP	-0.848726	-1.09465	-1.26611	0.22196	6.881	0.000140312	0.000141729
IL17RE	-0.636301	-0.62473	-0.990818	0.268665	6.73953	0.000170998	0.000170998
HCC_Blood
SLC4A10	-6.40484	-6.309	-6.73552	-0.419871	337.499	8.00479e-154	6.56393e-152
TARP	-6.26845	-2.02334	-7.83473	-0.451294	224.974	6.14884e-113	2.52102e-111
GZMA	-6.13616	-1.9093	-7.78991	-1.58985	191.161	4.34228e-99	1.18689e-97
PRF1	-6.68131	-1.81893	-6.44348	-0.836615	167.007	1.16061e-88	2.37926e-87
KLRG1	-5.82557	-2.15183	-7.55824	0.142818	147.924	4.45329e-80	7.3034e-79
ME1	-2.15762	-2.12591	-2.23785	-0.115117	118.775	2.54915e-66	3.48384e-65
NCR3	-4.66835	-4.31588	-4.50954	-0.470375	113.336	1.16611e-63	1.36602e-62
A2M	-4.73627	-2.19481	-6.16141	0.170018	109.51	9.03676e-62	9.26268e-61
GZMK	-6.30764	-3.59662	-7.60733	-0.63541	106.551	2.67901e-60	2.44088e-59
ZBTB16	-3.91105	-4.16888	-4.52867	0.0109799	105.212	1.25139e-59	1.02614e-58
IL18RAP	-4.81922	-4.40079	-5.24584	-0.857842	92.3685	4.12425e-53	3.07444e-52
KLRB1	-6.09324	-6.66342	-7.22856	-1.19837	88.4409	4.42079e-51	3.02087e-50
RORC	-3.11096	-3.38218	-3.01913	-0.171137	77.1082	4.01791e-45	2.53437e-44
PZP	-4.09966	-2.35655	-4.91809	0.00931193	75.9018	1.76739e-44	1.03519e-43
CCR1	-2.36995	-2.16362	-2.44918	-0.516161	74.5091	9.82173e-44	5.36921e-43
LTK	-1.8583	-1.89894	-1.96408	-0.153901	74.0084	1.82189e-43	9.33717e-43
ABCB1	-3.49603	-2.65305	-3.93039	-0.714281	66.4976	2.10491e-39	1.01531e-38
CXCR6	-4.9771	-3.86779	-4.46777	-3.08607	65.1191	1.19281e-38	5.43392e-38
LINC00612	-3.29317	-1.48451	-3.861	-0.0635718	64.8138	1.7528e-38	7.56472e-38
SYTL2	-4.28291	-3.00968	-5.43891	-0.825188	64.1935	3.83472e-38	1.57223e-37
COLQ	-3.08016	-3.07098	-3.42162	-0.297959	63.2967	1.19157e-37	4.65279e-37
DPP4	-1.88324	-3.42301	-3.72701	-0.217256	39.2486	4.70405e-24	1.75333e-23
GPR65	-4.18629	-2.80891	-4.62696	-0.0264787	38.272	1.74176e-23	6.20976e-23
TSPAN15	-1.29195	-1.28931	-1.34045	-0.100661	37.2728	6.66784e-23	2.27818e-22
MYBL1	-2.47357	-1.57895	-3.143	-0.112251	36.1385	3.07216e-22	1.00767e-21
KLRC1	-1.55941	-0.757011	-1.5685	-0.138234	33.2283	1.57644e-20	4.97184e-20
BLK	-0.913309	-0.853615	-0.933276	-0.0085231	32.8477	2.64337e-20	8.028e-20
CEBPD	-1.43231	-1.35443	-1.42596	-0.173134	31.4139	1.8609e-19	5.44978e-19
CXXC5	-1.31112	-1.19504	-1.25451	-0.0120294	28.3673	1.20157e-17	3.39753e-17
ERN1	-2.67185	-2.79467	-3.69297	-0.349307	28.0305	1.90815e-17	5.21562e-17
GYG1	-2.89342	-1.77688	-3.3078	-0.800883	26.3486	1.93142e-16	5.10891e-16
FEZ1	-1.08583	-0.937088	-1.15031	-0.0446202	25.2132	9.25969e-16	2.37279e-15
LST1	-1.53775	-1.83704	-1.89305	-0.246616	24.856	1.51717e-15	3.76994e-15
A2M-AS1	-2.03898	-1.51779	-2.42349	0.0424601	24.8136	1.60891e-15	3.88032e-15
PLXND1	-1.55571	-1.18028	-1.75331	-0.270152	24.3896	2.89338e-15	6.77877e-15
JAML	-3.23017	-3.60139	-1.67678	-0.652037	23.5577	9.16254e-15	2.08702e-14
FLT4	-0.757069	-0.719919	-0.844336	-0.0895698	23.4726	1.03107e-14	2.28507e-14
SPRY1	-0.72643	-0.639905	-0.694494	-0.235175	22.6453	3.2518e-14	7.01705e-14
B3GNT8	-0.926491	-0.920136	-0.972411	-0.0556931	21.6686	1.26525e-13	2.66027e-13
FKBP11	-2.65398	-2.06531	-3.4473	-0.367795	21.5302	1.53408e-13	3.14486e-13
TMIGD2	-1.05885	-1.58978	-2.07127	-0.000864172	21.4389	1.74223e-13	3.48446e-13
CACNA2D4	-1.28294	-1.2905	-1.37084	-0.123416	21.4173	1.79538e-13	3.50527e-13
PLD1	-0.857598	-0.845551	-0.716243	-0.10352	21.0378	3.04655e-13	5.8097e-13
SIPA1L2	-0.605211	-0.639759	-0.659723	-0.0170587	20.68	5.01812e-13	9.35195e-13
IL23R	-0.763728	-0.744389	-0.883828	-0.515079	20.6149	5.495e-13	1.00131e-12
CD69	-1.82821	-1.91197	-3.56378	-2.42129	19.3465	3.23182e-12	5.76107e-12
CCR5	-2.04975	-1.22463	-1.50059	-0.923823	18.9267	5.81448e-12	1.01444e-11
WDR86-AS1	-1.21098	-1.39126	-1.76273	0.0559989	18.5883	9.3379e-12	1.59522e-11
GTDC1	-1.92593	-1.1186	-1.94094	-0.404986	18.4314	1.16332e-11	1.94678e-11
CAPN12	-1.48926	-1.10855	-1.43071	-0.334104	18.3837	1.24371e-11	2.03968e-11
SPON1	-1.00665	-1.03925	-1.20894	-0.0131001	17.156	6.95792e-11	1.11872e-10
TLE1	-0.711731	-0.590479	-0.82957	-0.170852	16.6784	1.36079e-10	2.14586e-10
CFH	-1.32942	-1.16659	-1.7193	-0.00711346	16.2048	2.6477e-10	4.09645e-10
ELOVL4	-0.898872	-1.01659	-1.13884	0.0631501	15.9349	3.86995e-10	5.87659e-10
GPR171	-2.35996	-2.07669	-3.53334	-0.800752	15.5546	6.60781e-10	9.85165e-10
PRR5-ARHGAP8	-1.91594	-1.19766	-1.4107	0.110323	15.1619	1.14844e-09	1.67798e-09
TBC1D31	-1.84508	-1.47851	-1.98302	-0.358383	15.1509	1.1664e-09	1.67798e-09
SCRN1	-0.70736	-0.619726	-0.755385	-0.00771154	14.3809	3.45122e-09	4.87931e-09
RAB6B	-0.596064	-0.656722	-0.696612	-0.0269683	14.0994	5.13211e-09	7.13276e-09
CCR2	-1.36785	-1.57361	-1.7006	-0.433205	13.8194	7.61687e-09	1.04097e-08
GALC	-2.34398	-1.85825	-2.14119	-0.123256	13.7168	8.803e-09	1.18335e-08
IFNGR1	-2.37147	-1.56787	-2.6521	-0.811166	13.3951	1.38594e-08	1.83302e-08
IL18R1	-1.92	-1.4798	-1.36757	-0.931067	12.7625	3.38444e-08	4.40514e-08
WDR86	-0.692882	-0.84633	-1.05834	-0.0101674	12.313	6.38471e-08	8.1804e-08
ALOX5AP	-2.71252	-2.69578	-2.27049	-0.89846	11.9269	1.10149e-07	1.38958e-07
LIMK1	-1.03782	-0.828296	-0.989046	-0.313357	11.8166	1.28729e-07	1.59936e-07
DDIT4	-1.8573	-2.04534	-2.60018	-1.83155	11.2123	3.0233e-07	3.70016e-07
LOC643733	-1.87336	-1.66375	-1.90816	-0.535576	10.7816	5.55685e-07	6.70091e-07
THEM5	-0.658488	-0.843201	-0.679419	-0.0122084	10.1391	1.37776e-06	1.63734e-06
KIF5C	-0.742625	-0.784018	-1.08022	-0.115778	9.90055	1.9301e-06	2.26098e-06
RGS2	-1.38445	-1.24964	-1.40244	-0.964582	9.7665	2.33265e-06	2.69405e-06
APOL3	-1.96628	-1.88626	-2.81166	-0.0242213	9.74952	2.38927e-06	2.72111e-06
ODF2L	-1.49195	-2.21548	-1.55952	-0.0491414	9.07529	6.19354e-06	6.95713e-06
HACL1	-1.71011	-1.72212	-2.25084	-0.24254	9.04813	6.43578e-06	7.13154e-06
LONRF3	-0.606749	-0.731309	-0.691643	-0.051567	8.82057	8.87501e-06	9.70334e-06
ABCD1	-0.603163	-0.658898	-0.595972	-0.173577	8.46063	1.4752e-05	1.59166e-05
ATP10D	-0.809832	-0.601788	-0.656466	-0.492812	7.71093	4.24721e-05	4.523e-05
UGDH	-1.081	-1.11191	-1.08395	-0.0974245	7.25707	8.04966e-05	8.46246e-05
ABHD15	-1.02995	-0.876779	-0.98114	-0.0898688	7.1427	9.45572e-05	9.8148e-05
PHLPP2	-0.610489	-0.676609	-0.815467	-0.0125393	5.96142	0.000496802	0.000509222
C10orf128	-1.06021	-0.992219	-1.07897	-0.426943	5.64722	0.000771179	0.0007807
DYNLT3	-1.53977	-1.4832	-1.77496	-0.214402	5.24425	0.00135372	0.00135372
Supplementary Table 3. Genes upregulated in MAIT cells relative to other T cell subsets. Differential gene expression analysis with limma-trend was used to identify MAIT cell markers in the blood, tumor and adjacent normal tissues of cancer patients. Columns named by T cell subsets list the mean normalized expression of each gene in the corresponding subset. Nominal and Benjamini-Hochberg-adjuste…
